# Supplementary material for: Bioinspired cyclization of in situ generated γ-indolyl β,γ-unsaturated α-keto esters via an oxidative enamine process: facile approaches to pyrano[2,3-b]indoles
Source: Royal Society of Chemistry journal article supplement (doi:10.1039/d1qo00996f), 2021-01-01
Supplement: d1qo00996f1.pdf [file d1qo00996f1.pdf]

## Supporting Information

### **Bioinspired Cyclization of in Situ Generated $\gamma$ -Indolyl $\beta,\gamma$ -Unsaturated $\alpha$ -Keto Esters via Oxidative Enamine Process: Facile Approaches to Pyrano[2,3-b]indoles**

Man Wang, Qirui Xiang, Wen Si, Ran Song, Daoshan Yang, Ming Li,\* and Jian Lv\*

Key Laboratory of Optic-electric Sensing and Analytical Chemistry for Life Science, MOE, College of Chemistry and Molecular Engineering, Qingdao University of Science & Technology, Qingdao, 266042, China

\*Email: lvjian@iccas.ac.cn; liming928@qust.edu.cn

| <b>TABLE OF CONTENTS</b>                                   | <b>PAGE</b> |
|------------------------------------------------------------|-------------|
| I. General Experimental Information and Materials.....     | S2          |
| II. Initial Exploration.....                               | S3          |
| III. Optimization.....                                     | S7          |
| IV. Experimental Procedures and Characterization Data..... | S9          |
| V. Cyclic Voltammetry (CV) Experiments.....                | S26         |
| VI. Radical Trapping Experiments.....                      | S29         |
| VI. Control Experiments.....                               | S31         |
| VII. X-ray Structure.....                                  | S35         |
| VIII. NMR Spectrum.....                                    | S37         |
| IX. Reference.....                                         | S79         |

## I. General Experiment Information and Materials

All commercial reagents were used without further purification unless otherwise noted. Solvents were freshly dried according to *the purification handbook Purification of Laboratory Chemicals* before using. All of 4-alkoxy-substituted 3-(1H-indol-3-yl)-1,3-diphenylpropan-1-one **11**<sup>1</sup> and 4-(1H-indol-3-yl)-1,4-diphenyl butan-1,2-dione **14**<sup>2</sup> were prepared according to literature procedure. Proton and carbon magnetic resonance spectra (<sup>1</sup>H NMR and <sup>13</sup>C NMR) were recorded on a Bruker Avance 400 and 500MHz spectrometer. Tetramethylsilane (TMS) served as the internal standard for <sup>1</sup>H NMR, and CDCl<sub>3</sub> served as the internal standard for <sup>13</sup>C NMR. <sup>1</sup>H NMR data were reported as follows: chemical shift, multiplicity (s = singlet, d = doublet, t = triplet, m = multiplet, td = triplet of doublet, dt = doublet of triplet, dd = doublet of doublet), coupling constants (Hz), and integration. Infrared Spectroscopy was conducted on Thermo Fisher Nicolet is10. The X-ray single-crystal diffraction was performed on Saturn 724+ instrument. High resolution mass spectra were obtained on an Ultima Global spectrometer with an ESI source.

## II. Initial Exploration

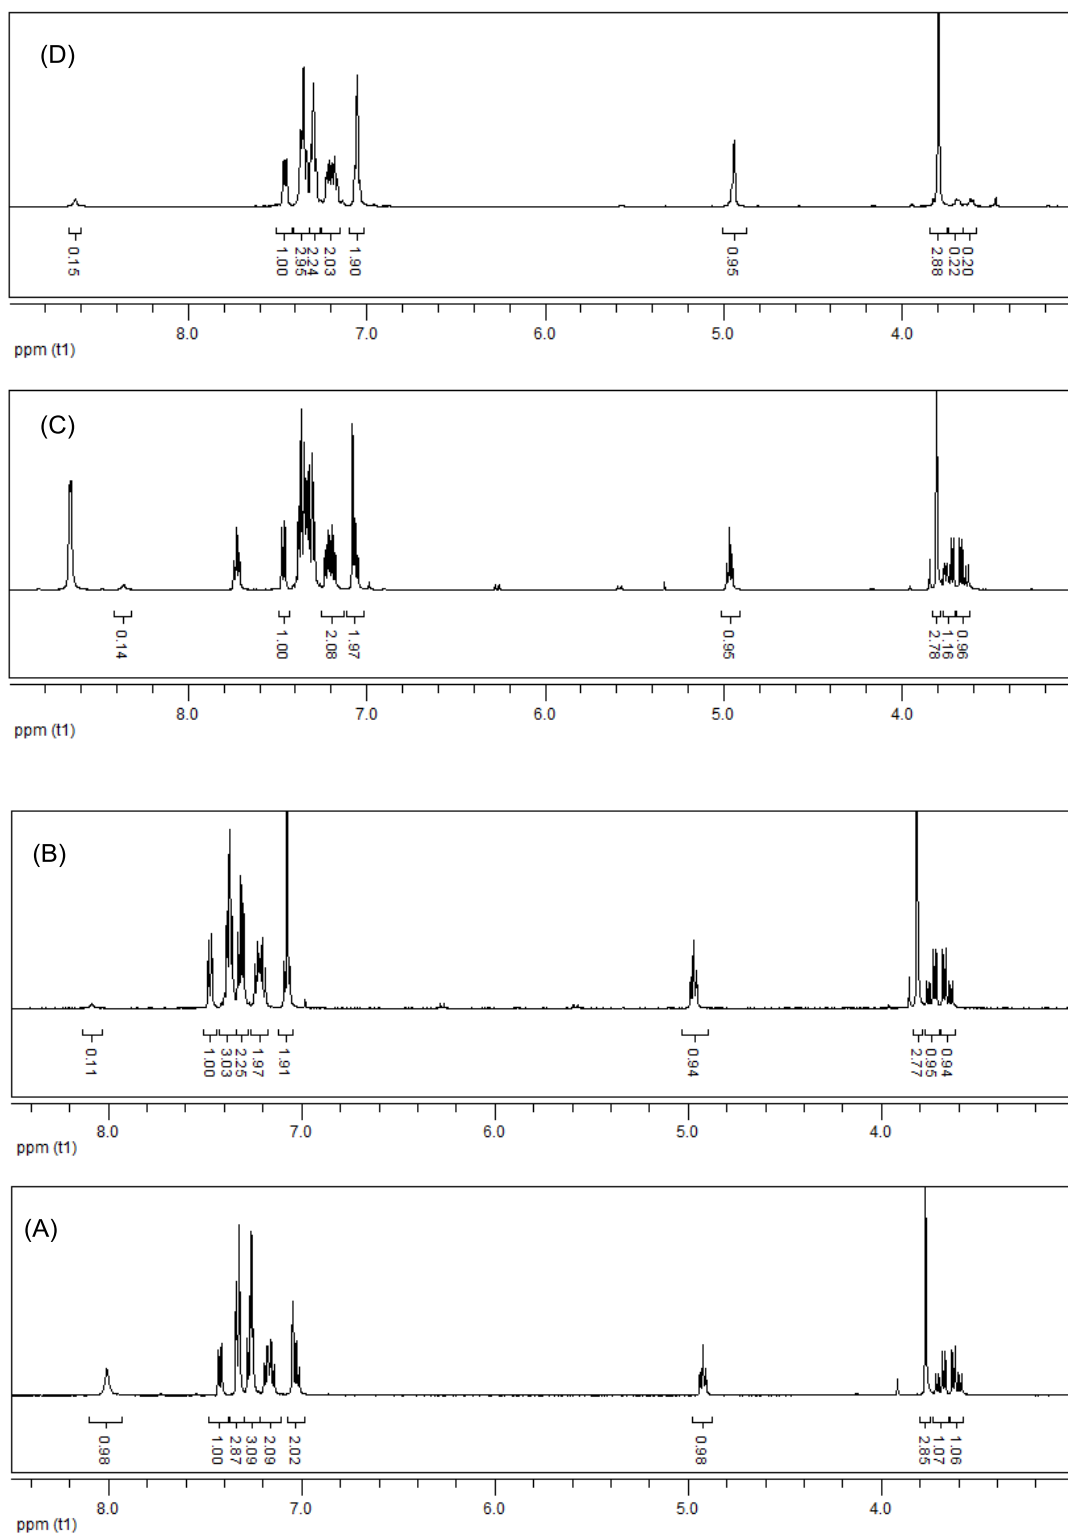

**Figure S1.** Deuterium-labelling Experiments in  $\text{CDCl}_3$  (1.0 mL). (A) **1a** (0.1 mmol); (B) **1a** (0.1 mmol) and  $\text{D}_2\text{O}$  (10 equiv); (C) pyridine (0.1 mmol), **1a** (0.1 mmol) and  $\text{D}_2\text{O}$  (10 equiv); (D) DABCO (0.1 mmol), **1a** (0.1 mmol) and  $\text{D}_2\text{O}$  (10 equiv).

### Regioselective oxidative test of $\gamma$ -indolyl $\alpha$ -keto ester **1aa** with TEMPO<sup>+</sup>BF<sub>4</sub><sup>-</sup>

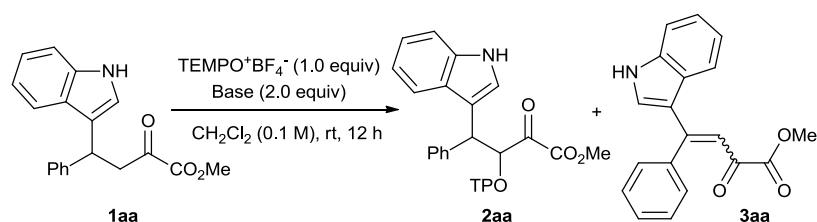

**A) Pyridine as a base:** To a solution of corresponding  $\alpha$ -keto ester **1aa** (0.1 mmol) and pyridine (0.1 mmol) in DCM (1.0 mL), was added TEMPO<sup>+</sup>BF<sub>4</sub><sup>-</sup> (0.1 mmol). After the mixture were stirred for 12 h, the mixture was diluted with DCM and washed with saturated sodium carbonate aqueous solution and saturated sodium chloride aqueous solution. The organic layer was dried over MgSO<sub>4</sub>, filtered and concentrated under vacuum. The solution was stirred at room temperature. Purification of mixture by column chromatography on silica gel (DCM/EA = 30:1, v/v) gave the desired product **3aa** (28.1 mg, 92% yield).

**B) DABCO as a base:** To a solution of corresponding  $\alpha$ -keto ester **1aa** (0.1 mmol) and DABCO (0.1 mmol) in DCM (1.0 mL), was added TEMPO<sup>+</sup>BF<sub>4</sub><sup>-</sup> (0.1 mmol). After the mixture were stirred for 12 h, the mixture was diluted with DCM and washed with saturated sodium carbonate aqueous solution and saturated sodium chloride aqueous solution. The organic layer was dried over MgSO<sub>4</sub>, filtered and concentrated under vacuum. The solution was stirred at room temperature. Purification of mixture by column chromatography on silica gel (DCM/EA = 30:1, v/v) gave the product **2aa** (10.2 mg, 22% yield) and **3aa** (6.1 mg, 20% yield), respectively.

## Photocatalytic oxidative coupling reaction of $\gamma$ -indolyl $\alpha$ -keto ester **1a** with TEMPO

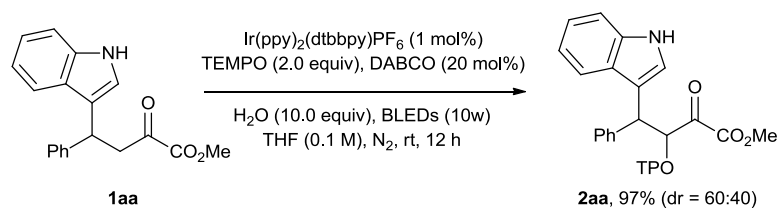

To a 10 mL Schlenk tube equipped with a magnetic stir bar was added **1aa** (0.1 mmol), TEMPO (0.2 mmol), DABCO (20 mol%) and Ir(ppy)<sub>2</sub>(dtbbpy)PF<sub>6</sub> (1 mol%). The resulting mixture was sealed and degassed via vacuum evacuation and subsequent backfill with nitrogen for three times. Then anhydrous THF (1.0 mL) and H<sub>2</sub>O (18  $\mu$ L, 10.0 equiv) was added. After that, the reaction mixture was irradiated by blue LEDs (456nm, 10w) for 12h at room temperature. After reaction, the mixture was concentrated under vacuum. Purification of mixture by column chromatography on silica gel (PE/EA = 8:1, v/v) gave the desired product *cis*-**2aa** (26.9 mg, 58%) and *trans*-**2aa** (18.0 mg, 39% yield). *cis*-**2aa**: yellow oil; <sup>1</sup>H NMR (500 MHz, CDCl<sub>3</sub>):  $\delta$  8.00 (br, 1H), 7.77 (d, *J* = 7.5 Hz, 1H), 7.42 (d, *J* = 7.5 Hz, 2H), 7.31 (d, *J* = 8.0 Hz, 1H), 7.28 – 7.25 (m, 2H), 7.19 – 7.11 (m, 3H), 6.91 (s, 1H), 6.07 (d, *J* = 10.0 Hz, 1H), 4.96 (d, *J* = 9.5 Hz, 1H), 3.57 (s, 3H), 1.43 – 1.19 (m, 6H), 1.12 (s, 3H), 1.01 (s, 3H), 0.95 (s, 3H), 0.45 (s, 3H) ppm; <sup>13</sup>C NMR (125 MHz, CDCl<sub>3</sub>):  $\delta$  196.3, 161.4, 140.0, 136.0, 129.0, 128.5, 127.9, 126.7, 123.4, 122.0, 119.9, 119.5, 116.6, 110.9, 84.3, 61.1, 59.9, 52.6, 43.6, 40.5, 40.2, 34.2, 33.7, 20.5, 20.0, 17.0 ppm; IR (KBr, cm<sup>-1</sup>): 3409, 2941, 1741, 1618, 1543, 1282, 1256, 1133, 1069, 784, 745, 705, 632; HRMS (ESI) calcd for C<sub>28</sub>H<sub>34</sub>N<sub>2</sub>NaO<sub>4</sub><sup>+</sup> (M+Na)<sup>+</sup> 485.2411, found 485.2423. *trans*-**2aa**: yellow oil; <sup>1</sup>H NMR (500 MHz, CDCl<sub>3</sub>):  $\delta$  8.03 (br, 1H), 7.38 (d, *J* = 8.0 Hz, 4H), 7.28 (d, *J* = 8.0 Hz, 1H), 7.24 – 7.22 (m, 2H), 7.15 (t, *J* = 7.5 Hz, 1H), 7.11 (t, *J* = 7.0 Hz, 1H), 6.98 (t, *J* = 7.5 Hz, 1H), 5.87 (d, *J* = 10.5 Hz, 1H), 4.96 (d, *J* = 9.5 Hz, 1H), 3.60 (s, 3H), 1.47 – 1.20 (m, 6H), 1.07 (s, 6H), 0.94 (s, 3H), 0.63 (s, 3H) ppm; <sup>13</sup>C NMR (125 MHz, CDCl<sub>3</sub>):  $\delta$  195.3, 161.6, 140.7, 136.1, 129.5, 128.0, 127.0, 126.7, 122.8, 122.3, 119.5, 113.9, 111.0, 83.4, 61.2, 60.6, 52.6, 44.1, 40.6, 40.2, 34.0, 33.7, 20.7, 20.4, 20.0, 17.0

ppm; IR( KBr,  $\text{cm}^{-1}$ ): 3415, 2931, 1730, 1619, 1454, 1378, 1281, 1223, 1033, 909, 735, 699; HRMS (ESI) calcd for  $\text{C}_{28}\text{H}_{35}\text{N}_2\text{O}_4^+$  (M+H)<sup>+</sup> 463.2591, found 463.2587.

### III. Optimization

**Table S1.** Screening of Different Solvents in Oxidative Dehydrogenation of  $\alpha$ -keto ester **1a**<sup>a</sup>

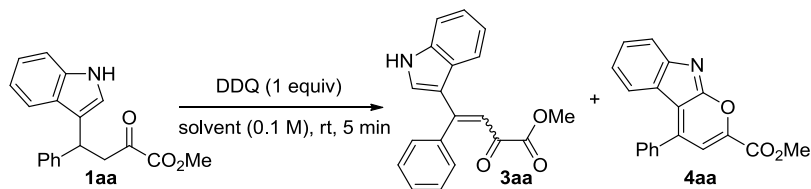

| entry    | solvent                                                 | yield ( <b>3aa</b> , %) <sup>b</sup> | <i>E/Z</i> <sup>c</sup> | yield ( <b>4aa</b> , %) |
|----------|---------------------------------------------------------|--------------------------------------|-------------------------|-------------------------|
| <b>1</b> | <b>CH<sub>2</sub>Cl<sub>2</sub> (DCM)</b>               | <b>94</b>                            | <b>75:25</b>            | —                       |
| 2        | 1,2-C <sub>2</sub> H <sub>4</sub> Cl <sub>2</sub> (DCE) | 93                                   | 75:25                   | —                       |
| 3        | Toluene                                                 | 86                                   | 75:25                   | —                       |
| 4        | MeCN                                                    | 74                                   | 75:25                   | —                       |
| 5        | THF                                                     | 63                                   | 75:25                   | —                       |
| 6        | EtOH                                                    | 76                                   | 4:1                     | —                       |

<sup>a</sup> Reaction Conditions: **1aa** (0.1 mmol), DDQ (0.1 mmol), were added to solvent (1.0 mL) at room temperature for 5 h. <sup>b</sup> Isolated yield. <sup>c</sup> Determined by <sup>1</sup>H NMR.

**Table S2.** Screening of Different Solvents in Oxidative Intramolecular Cyclization of  $\alpha$ -keto ester **1aa**<sup>a</sup>

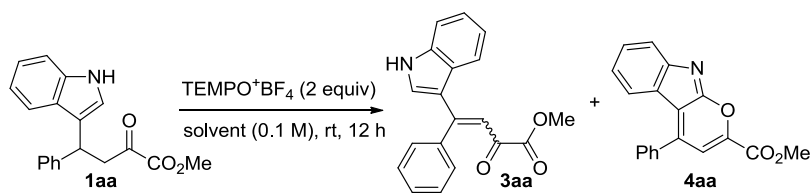

| entry                | solvent                                                 | yield ( <b>3aa</b> , %) <sup>b</sup> | <i>E/Z</i> <sup>c</sup> | yield ( <b>4aa</b> , %) <sup>b</sup> |
|----------------------|---------------------------------------------------------|--------------------------------------|-------------------------|--------------------------------------|
| 1                    | CH <sub>2</sub> Cl <sub>2</sub> (DCM)                   | 7                                    | 68:32                   | 75                                   |
| 2                    | 1,2-C <sub>2</sub> H <sub>4</sub> Cl <sub>2</sub> (DCE) | 14                                   | 68:32                   | 57                                   |
| 3                    | toluene                                                 | 27                                   | 68:32                   | 23                                   |
| 4                    | MeCN                                                    | 12                                   | 75:25                   | 42                                   |
| 5                    | THF                                                     | 34                                   | 68:32                   | trace                                |
| 6                    | acetone                                                 | 41                                   | 68:32                   | trace                                |
| <b>7<sup>d</sup></b> | <b>DCM</b>                                              | —                                    | —                       | <b>78</b>                            |

<sup>a</sup> Reaction Conditions: **1aa** (0.1 mmol), TEMPO<sup>+</sup>BF<sub>4</sub><sup>-</sup> (0.2 mmol), were added to solvent (1.0 mL) at room temperature for 12 h. <sup>b</sup> Isolated yield. <sup>c</sup> Determined by <sup>1</sup>H NMR. <sup>d</sup> DDQ (0.1 mmol) and TEMPO<sup>+</sup>BF<sub>4</sub><sup>-</sup> (0.15 mmol) at room temperature for 40 min.



## IV. Experimental Procedures and Characterization Data

### A) Synthesis of $\gamma$ -indolyl $\alpha$ -keto ester 1:

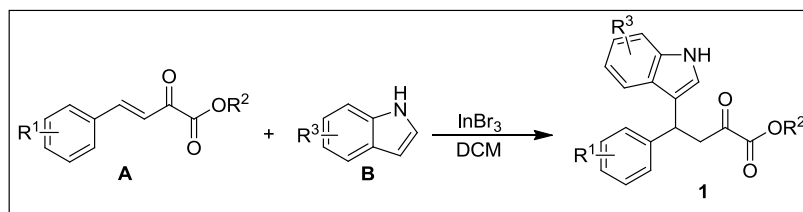

**General procedure I:**  $\beta,\gamma$ -unsaturated  $\alpha$ -ketoester derivatives **A** (4 mmol) and indole derivatives **B** (4.8 mmol) were dissolved in 40 mL DCM, then  $\text{InBr}_3$  (5mol%, 0.2 mmol) was added. The solution was stirred at room temperature for 2 hours. Purification of mixture by column chromatography on silica gel (PE/EA = 5:1 to 3:1, v/v) gave the desired products **1**.

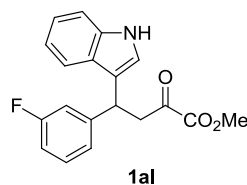

**1al:** Prepared according to the general procedure I above and obtained as light yellow solid (1.04g, 80%), eluent: petroleum ether/ethyl acetate (5:1 to 3:1);  $^1\text{H}$  NMR (500 MHz,  $\text{CDCl}_3$ ):  $\delta$  8.05 (s, 1H), 7.40 (d,  $J = 8.0$  Hz, 1H), 7.32 (d,  $J = 8.0$  Hz, 1H), 7.22 – 7.20 (m, 1H), 7.18 – 7.12 (m, 2H), 7.05 – 6.99 (m, 3H), 6.88 – 6.85 (m, 1H), 4.91 (t,  $J = 7.5$  Hz, 1H), 3.78 (s, 3H), 3.67 (dd,  $J = 7.0, 17.5$  Hz, 1H), 3.58 (dd,  $J = 8.0, 17.5$  Hz, 1H) ppm;  $^{13}\text{C}$  NMR (125 MHz,  $\text{CDCl}_3$ ):  $\delta$  192.2, 163.0 (d,  $J = 244.3$  Hz), 161.2, 146.0 (d,  $J = 3.4$  Hz), 136.6, 130.0 (d,  $J = 7.8$  Hz), 126.3, 123.5, 122.5, 121.5, 119.7, 119.3, 117.7, 114.7 (d,  $J = 7.8$  Hz), 113.6 (d,  $J = 21.1$  Hz), 111.3, 53.0, 45.4, 37.4 ppm.

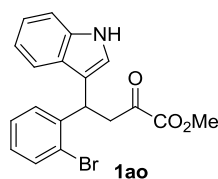

**1ao:** Prepared according to the general procedure I above and obtained as light yellow solid (1.09g, 71%), eluent: petroleum ether/ethyl acetate (5:1 to 3:1);  $^1\text{H}$  NMR (500

MHz, CDCl<sub>3</sub>):  $\delta$  8.07 (s, 1H), 7.56 (d,  $J = 7.5$  Hz, 1H), 7.42 (d,  $J = 7.5$  Hz, 1H), 7.27 (d,  $J = 8.0$  Hz, 1H), 7.17 – 7.10 (m, 3H), 7.02 (t,  $J = 7.5$  Hz, 2H), 6.98 (s, 1H), 5.41 (t,  $J = 7.5$  Hz, 1H), 3.77 (s, 3H), 3.70 (dd,  $J = 9.0, 17.0$  Hz, 1H), 3.42 (dd,  $J = 6.0, 17.0$  Hz, 1H) ppm; <sup>13</sup>C NMR (125 MHz, CDCl<sub>3</sub>):  $\delta$  192.2, 161.3, 142.2, 136.6, 133.1, 129.2, 128.3, 127.8, 126.5, 124.2, 122.4, 122.2, 120.0, 119.5, 116.9, 111.3, 53.1, 44.8, 37.0 ppm.

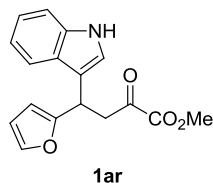

**1ar**: Prepared according to the general procedure I above and obtained as light red solid (0.70g, 59%), eluent: petroleum ether/ethyl acetate (5:1 to 3:1); <sup>1</sup>H NMR (500 MHz, CDCl<sub>3</sub>):  $\delta$  8.01 (s, 1H), 7.55 (d,  $J = 8.0$  Hz, 1H), 7.33 – 7.30 (m, 2H), 7.17 (t,  $J = 7.5$  Hz, 1H), 7.10 – 7.07 (m, 2H), 6.26 – 6.25 (m, 1H), 6.05 (d,  $J = 3.0$  Hz, 1H), 4.98 (t,  $J = 7.5$  Hz, 1H), 3.78 (s, 3H), 3.71 (dd,  $J = 7.5, 17.5$  Hz, 1H), 3.59 (dd,  $J = 7.0, 17.0$  Hz, 1H) ppm; <sup>13</sup>C NMR (125 MHz, CDCl<sub>3</sub>):  $\delta$  192.2, 161.1, 155.8, 141.4, 136.4, 126.0, 122.3, 122.3, 119.6, 119.3, 115.5, 111.3, 110.2, 106.0, 53.0, 43.8, 31.7 ppm.

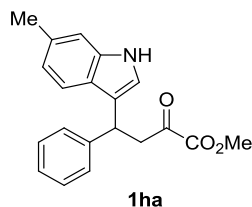

**1ha**: Prepared according to the general procedure I above and obtained as light yellow solid (0.91g, 71%), eluent: petroleum ether/ethyl acetate (5:1 to 3:1); <sup>1</sup>H NMR (500 MHz, CDCl<sub>3</sub>):  $\delta$  7.87 (s, 1H), 7.32 – 7.27 (m, 3H), 7.25 – 7.24 (m, 2H), 7.16 (t,  $J = 7.5$  Hz, 1H), 7.10 (s, 1H), 6.93 (d,  $J = 2.0$  Hz, 1H), 6.85 (d,  $J = 8.0$  Hz, 1H), 4.89 (t,  $J = 7.5$  Hz, 1H), 3.76 (s, 3H), 3.67 (dd,  $J = 7.0, 17.0$  Hz, 1H), 3.58 (dd,  $J = 7.5, 17.0$  Hz, 1H), 2.41 (s, 3H) ppm; <sup>13</sup>C NMR (125 MHz, CDCl<sub>3</sub>):  $\delta$  193.0, 161.3, 143.3, 137.1, 132.1, 128.5, 127.8, 126.6, 124.3, 121.3, 121.0, 119.1, 118.1, 111.1, 52.9, 45.7, 37.8, 21.7 ppm.

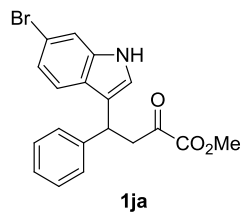

**1ja:** Prepared according to the general procedure I above and obtained as light yellow solid (1.19g, 77%), eluent: petroleum ether/ethyl acetate (5:1 to 3:1);  $^1\text{H}$  NMR (500 MHz, DMSO- $d_6$ ):  $\delta$  11.06 (s, 1H), 7.50 (d,  $J = 2.0$  Hz, 1H), 7.33 – 7.32 (m, 4H), 7.24 (t,  $J = 7.5$  Hz, 2H), 7.13 (t,  $J = 7.5$  Hz, 1H), 7.02 (dd,  $J = 1.5, 8.5$  Hz, 1H), 4.69 (t,  $J = 7.5$  Hz, 1H), 3.74 (s, 3H), 3.71 – 3.55 (m, 2H) ppm;  $^{13}\text{C}$  NMR (125 MHz, DMSO- $d_6$ ):  $\delta$  192.1, 160.8, 144.1, 137.2, 128.2, 127.5, 126.1, 125.2, 123.1, 121.2, 120.4, 117.5, 113.9, 52.6, 44.9, 36.6 ppm.

## B) Synthesis $\gamma$ -indolyl $\beta,\gamma$ -unsaturated $\alpha$ -keto esters **3aa**:

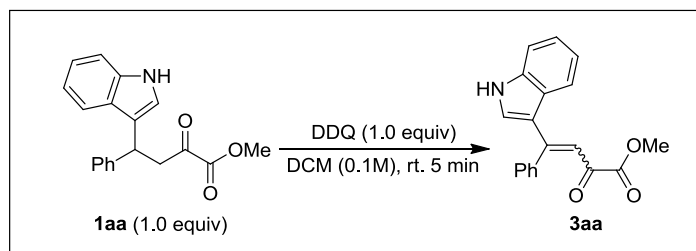

**Reaction procedure II:** Compound **1aa** (0.2 mmol) and DDQ (0.2 mmol) was dissolved in DCM (2mL). The solution was stirred at room temperature for 5 minutes. Purification of mixture by column chromatography on silica gel (DCM/EA = 30:1, v/v) gave the desired product **3aa** (57.3 mg, 94% yield, *E/Z* = 75:25).

**Large-scale Reaction:** Compound **1aa** (3.9mmol, 1.20g) and DDQ (1.0 equiv, 885 mg) was dissolved in DCM (39 mL). After reaction, the mixture was diluted with DCM and washed with saturated sodium carbonate aqueous solution and saturated sodium chloride aqueous solution. The organic layer was dried over MgSO<sub>4</sub>, filtered and concentrated under vacuum. Purification of mixture by column chromatography on silica gel (DCM /EA = 30:1, v/v) gave the desired product **3aa** (940mg, 79% yield, *E/Z* = 75:25, M.P. = 186 °C).

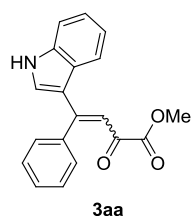

**3aa:** <sup>1</sup>H NMR (500 MHz, DMSO-d<sub>6</sub>): δ 12.02 (br, 1H), 11.83 (br, 0.3H), 7.75 (s, 0.3H), 7.55 – 7.48 (m, 4H), 7.46 – 7.43 (m, 2.9H), 7.30 – 7.28 (m, 3H), 7.24 (t, *J* = 7.5 Hz, 1H), 7.18 – 7.13 (m, 1.3H), 7.06 (s, 1H), 6.91 (t, *J* = 7.5 Hz, 0.3H), 6.69 (d, *J* = 8.0 Hz, 0.3H), 6.67 (s, 0.3H), 3.44 (s, 3H), 3.13 (s, 0.9H); <sup>13</sup>C NMR (125 MHz, DMSO-d<sub>6</sub>): δ 184.7, 183.6, 164.2, 163.8, 156.9, 154.8, 139.3, 138.5, 137.7, 137.0, 133.1, 132.5, 130.5, 129.5, 129.0, 128.8, 128.6, 127.9, 126.0, 124.7, 122.8, 122.3, 121.5, 120.2, 116.6, 114.8, 112.9, 112.1, 51.9, 51.6 ppm; IR (KBr, cm<sup>-1</sup>): 3443, 3236, 2925, 2351, 1735, 1641, 1535, 1478, 1409, 1249, 1085, 743, 683, 589; HRMS (ESI) calcd for C<sub>19</sub>H<sub>16</sub>NO<sub>3</sub><sup>+</sup> (M+H)<sup>+</sup> 306.1130, found 306.1132.

### C) Synthesis of pyrano[2,3-b]indoles

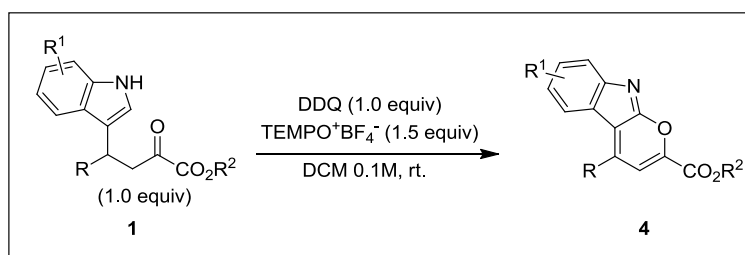

**General procedure III:** Compound **1** (0.2 mmol), DDQ (0.2 mmol) and TEMPO<sup>+</sup>BF<sub>4</sub><sup>-</sup> (0.3 mmol) was dissolved in DCM (2.0 mL). After reaction, the mixture was diluted with DCM and washed with saturated sodium carbonate aqueous solution and saturated sodium chloride aqueous solution. The organic layer was dried over MgSO<sub>4</sub>, filtered and concentrated under vacuum. The solution was stirred at room temperature. Purification of mixture by column chromatography on silica gel (DCM/EA = 20:1, v/v) gave the desired product **4**.

#### Large-scale Reaction:

Compound **1aa** (3.6mmol, 1.10g), DDQ (1.0 eq., 817 mg) and TEMPO<sup>+</sup>BF<sub>4</sub><sup>-</sup> (1.5 eq., 1.31g) was dissolved in DCM (36ml). After reaction, the mixture was diluted with DCM and washed with saturated sodium carbonate aqueous solution and saturated sodium chloride aqueous solution. The organic layer was dried over MgSO<sub>4</sub>, filtered and concentrated under vacuum. Purification of mixture by column chromatography on silica gel (DCM/EA = 20:1, v/v) gave the desired product **4aa** (730mg, 66% yield).

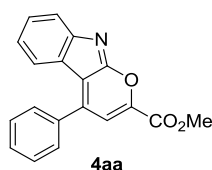

**4aa:** Prepared according to the general procedure III above and obtained as red solid (47.3mg, 78% yield, M.P. = 202 °C), eluent: DCM/EA = 20:1; <sup>1</sup>H NMR (500 MHz, CDCl<sub>3</sub>): δ 7.79 – 7.76 (m, 3H), 7.74 (d, *J* = 7.0 Hz, 1H), 7.67 (s, 1H), 7.65 – 7.62 (m, 3H), 7.54 (t, *J* = 7.5 Hz, 1H), 7.13 (t, *J* = 7.5 Hz, 1H), 4.04 (s, 3H) ppm; <sup>13</sup>C NMR (125 MHz, CDCl<sub>3</sub>): δ 164.2, 160.6, 153.5, 143.9, 143.7, 135.3, 130.9, 130.6, 129.3, 128.5, 124.5, 123.2, 122.2, 119.9, 113.5, 53.3 ppm; IR (KBr, cm<sup>-1</sup>): 3836, 3743, 2922, 1741, 1642, 1549, 1436, 1366, 1319, 1286, 1247, 1191, 1137, 1114, 935, 874, 760,

703, 565, 481, 437; HRMS (ESI) calcd for  $C_{19}H_{14}NO_3^+$  (M+H)<sup>+</sup> 304.0973, found 304.0975.

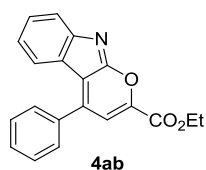

**4ab:** Prepared according to the general procedure III above and obtained as red solid (43.7mg, 69% yield, M.P. = 181 °C), eluent: DCM/EA = 20:1; <sup>1</sup>H NMR (500 MHz, CDCl<sub>3</sub>): δ 7.78 – 7.76 (m, 3H), 7.72 (d, *J* = 7.0 Hz, 1H), 7.65 (s, 1H), 7.63 – 7.59 (m, 3H), 7.52 (t, *J* = 7.5 Hz, 1H), 7.11 (t, *J* = 7.5 Hz, 1H), 4.49 (q, *J* = 7.0 Hz, 2H), 1.46(d, *J* = 7.0 Hz, 3H) ppm; <sup>13</sup>C NMR (125 MHz, CDCl<sub>3</sub>): δ 164.2, 160.1, 153.5, 144.3, 143.8, 135.4, 130.8, 130.6, 129.2, 128.5, 124.3, 123.2, 122.1, 119.8, 113.2, 62.7, 14.2 ppm; IR (KBr, cm<sup>-1</sup>): 2922, 2850, 1734, 1642, 1552, 1472, 1439, 1395, 1369, 1320, 1290, 1245, 1228, 1192, 1143, 1112, 1025, 757, 731, 704, 671; HRMS (ESI) calcd for  $C_{20}H_{16}NO_3^+$  (M+H)<sup>+</sup> 318.1130, found 318.1130.

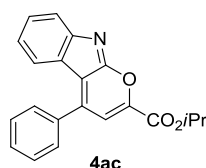

**4ac:** Prepared according to the general procedure III above and obtained as red solid (43.0mg, 65% yield, M.P. = 181 °C), eluent: DCM/EA = 20:1; <sup>1</sup>H NMR (500 MHz, CDCl<sub>3</sub>): δ 7.77 (d, *J* = 8.0 Hz, 3H), 7.72 (d, *J* = 8.0 Hz, 1H), 7.64 – 7.61 (m, 4H), 7.52 (t, *J* = 7.5 Hz, 1H), 7.11 (t, *J* = 7.5 Hz, 1H), 5.36 – 5.29 (m, 1H), 1.44(d, *J* = 6.0 Hz, 6H) ppm; <sup>13</sup>C NMR (125 MHz, CDCl<sub>3</sub>): δ 164.3, 159.6, 153.5, 144.6, 143.9, 135.4, 130.8, 130.6, 129.2, 128.5, 124.2, 123.1, 122.1, 119.8, 113.1, 70.8, 21.8 ppm; IR (KBr, cm<sup>-1</sup>): 2922, 2851, 1730, 1641, 1578, 1550, 1494, 1466, 1437, 1376, 1366, 1319, 1289, 1275, 1251, 1227, 1190, 1141, 1102, 758, 731, 705, 670; HRMS (ESI) calcd for  $C_{21}H_{18}NO_3^+$  (M+H)<sup>+</sup> 332.1287, found 332.1288.

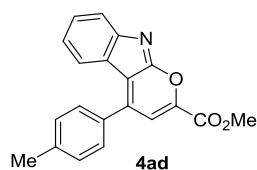

**4ad:** Prepared according to the general procedure III above and obtained as red solid (44.4mg, 70% yield, M.P. = 185 °C), eluent: DCM/EA = 20:1; <sup>1</sup>H NMR (500 MHz, CDCl<sub>3</sub>): δ 7.84 (d, *J* = 7.5 Hz, 1H), 7.72 (d, *J* = 7.5 Hz, 1H), 7.67 (d, *J* = 8.0 Hz, 2H), 7.65 (s, 1H), 7.52 (t, *J* = 7.5 Hz, 1H), 7.12 (t, *J* = 7.5 Hz, 1H), 4.03 (s, 3H), 2.51 (s, 3H) ppm; <sup>13</sup>C NMR (125 MHz, CDCl<sub>3</sub>): δ 164.2, 160.6, 153.4, 143.9, 141.2, 132.4, 130.7, 129.9, 128.6, 124.1, 123.2, 122.3, 122.0, 119.8, 113.5, 53.2, 21.6 ppm; IR (KBr, cm<sup>-1</sup>): 3425, 3059, 2921, 1719, 1639, 1543, 1434, 1370, 1297, 1255, 1230, 1191, 1124, 1018, 941, 895, 829, 757, 564, 517, 459, 427; HRMS (ESI) calcd for C<sub>20</sub>H<sub>16</sub>NO<sub>3</sub><sup>+</sup> (M+H)<sup>+</sup> 318.1130, found 318.1131.

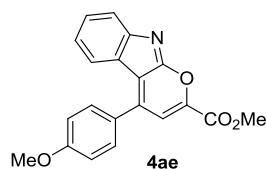

**4ae:** Prepared according to the general procedure III above and obtained as red solid (46.6mg, 70% yield, M.P. = 206 °C), eluent: DCM/EA = 20:1; <sup>1</sup>H NMR (500 MHz, CDCl<sub>3</sub>): δ 7.88 (d, *J* = 7.5 Hz, 1H), 7.77 – 7.72 (m, 3H), 7.66 (s, 1H), 7.53 (t, *J* = 7.0 Hz, 1H), 7.15 – 7.12 (m, 3H), 4.03 (s, 3H), 3.95 (s, 3H) ppm; <sup>13</sup>C NMR (125 MHz, CDCl<sub>3</sub>): δ 164.2, 161.7, 160.7, 153.3, 143.8, 143.7, 130.6, 130.4, 127.4, 123.5, 123.0, 122.3, 122.0, 119.8, 114.7, 113.5, 55.6, 53.2 ppm; IR (KBr, cm<sup>-1</sup>): 2923, 1724, 1639, 1548, 1427, 1368, 1299, 1255, 1116, 1022, 838, 759, 566, 530, 474, 411; HRMS (ESI) calcd for C<sub>20</sub>H<sub>16</sub>NO<sub>4</sub><sup>+</sup> (M+H)<sup>+</sup> 334.1079, found 334.1076.

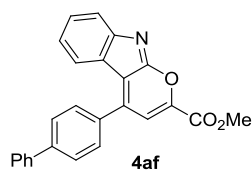

**4af:** Prepared according to the general procedure III above and obtained as red solid (54.6mg, 72% yield, M.P. = 235 °C), eluent: DCM/EA = 20:1; <sup>1</sup>H NMR (500 MHz, CDCl<sub>3</sub>): δ 7.90 – 7.85 (m, 5H), 7.75 – 7.70 (m, 4H), 7.55 – 7.50 (m, 3H), 7.43 (t, *J* = 7.0 Hz, 1H), 7.14 (t, *J* = 7.5 Hz, 1H), 4.04 (s, 3H) ppm; <sup>13</sup>C NMR (125 MHz, CDCl<sub>3</sub>): δ 164.2, 160.6, 153.5, 144.0, 143.6, 143.4, 139.8, 134.1, 130.9, 129.1, 129.1, 128.2, 127.8, 127.2, 124.3, 123.2, 122.2, 119.9, 113.3, 53.3 ppm; IR (KBr, cm<sup>-1</sup>): 2921, 2850,

1718, 1639, 1553, 1487, 1436, 1404, 1364, 1301, 1257, 1227, 1191, 1152, 1128, 1024, 1006, 875, 843, 786, 766, 754, 734, 724, 692, 672, 646; HRMS (ESI) calcd for  $C_{25}H_{18}NO_3^+$  (M+H)<sup>+</sup> 380.1287, found 380.1284.

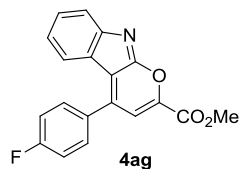

**4ag:** Prepared according to the general procedure III above and obtained as red solid (56.5mg, 67% yield, M.P. = 206 °C), eluent: DCM/EA = 20:1; <sup>1</sup>H NMR (500 MHz, CDCl<sub>3</sub>): δ 7.79 – 7.77 (m, 2H), 7.73 (t, *J* = 7.5 Hz, 2H), 7.61 (s, 1H), 7.53 (t, *J* = 7.5 Hz, 1H), 7.32 (t, *J* = 8.5 Hz, 2H), 7.13 (t, *J* = 7.5 Hz, 1H), 4.03 (s, 3H) ppm; <sup>13</sup>C NMR (125 MHz, CDCl<sub>3</sub>): δ 163.1, 163.0 (d, *J* = 250.8 Hz), 159.5, 152.5, 143.0, 141.5, 130.3, 130.0, 129.7 (d, *J* = 8.3 Hz), 123.5, 121.6 (d, *J* = 89.5 Hz), 121.0, 118.9, 115.5 (d, *J* = 21.9 Hz), 112.2, 52.3 ppm; IR (KBr, cm<sup>-1</sup>): 3112, 3065, 2923, 2853, 1729, 1642, 1602, 1548, 1509, 1430, 1365, 1320, 1290, 1251, 1225, 1189, 1162, 1116, 936, 860, 806, 761, 731, 674, 612, 545, 514, 460, 427; HRMS (ESI) calcd for  $C_{19}H_{13}FNO_3^+$  (M+H)<sup>+</sup> 322.0879, found 322.0881.

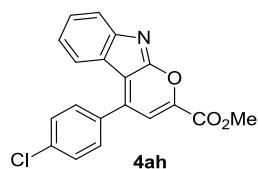

**4ah:** Prepared according to the general procedure III above and obtained as red solid (45.8mg, 68% yield, M.P. = 193 °C), eluent: DCM/EA = 20:1; <sup>1</sup>H NMR (500 MHz, CDCl<sub>3</sub>): δ 7.74 – 7.71 (m, 4H), 7.61 (d, *J* = 9.0 Hz, 3H), 7.54 (t, *J* = 7.5 Hz, 1H), 7.13 (t, *J* = 7.5 Hz, 1H), 4.03 (s, 3H) ppm; <sup>13</sup>C NMR (125 MHz, CDCl<sub>3</sub>): δ 164.0, 160.5, 153.6, 144.0, 142.2, 136.9, 133.7, 131.1, 129.9, 129.6, 124.6, 123.1, 122.3, 121.9, 120.0, 113.0, 53.3 ppm; IR (KBr, cm<sup>-1</sup>): 3057, 2953, 1735, 1644, 1556, 1438, 1269, 1139, 865, 851, 837, 735, 677, 566, 452; HRMS (ESI) calcd for  $C_{19}H_{13}ClNO_3^+$  (M+H)<sup>+</sup> 338.0584, found 338.0583.



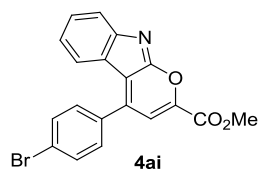

**4ai:** Prepared according to the general procedure III above and obtained as red solid (63.2mg, 83% yield, M.P. = 219 °C), eluent: DCM/EA = 20:1; <sup>1</sup>H NMR (500 MHz, CDCl<sub>3</sub>): δ 7.78 – 7.71 (m, 4H), 7.66 – 7.64 (m, 2H), 7.60 – 7.59 (m, 1H), 7.54 (t, *J* = 7.5 Hz, 1H), 7.14 (t, *J* = 7.5 Hz, 1H), 4.03 (s, 3H) ppm; <sup>13</sup>C NMR (125 MHz, CDCl<sub>3</sub>): δ 164.0, 160.5, 153.6, 144.1, 142.2, 134.2, 132.6, 131.2, 130.1, 125.2, 124.6, 123.1, 122.3, 121.9, 120.0, 112.9, 53.3 ppm; IR (KBr, cm<sup>-1</sup>): 2919, 1743, 1642, 1547, 1434, 1358, 1286, 1245, 1189, 1116, 1068, 824, 758, 604, 563, 482, 419; HRMS (ESI) calcd for C<sub>19</sub>H<sub>13</sub>BrNO<sub>3</sub><sup>+</sup> (M+H)<sup>+</sup> 382.0079, found 382.0079.

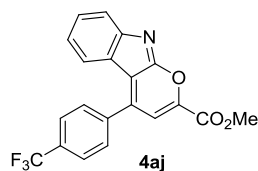

**4aj:** Prepared according to the general procedure III above and obtained as red solid (46.0mg, 62% yield, M.P. = 208 °C), eluent: DCM/EA = 20:1; <sup>1</sup>H NMR (500 MHz, CDCl<sub>3</sub>): δ 7.90 (s, 4H), 7.73 (d, *J* = 8.0 Hz, 1H), 7.65 (d, *J* = 8.0 Hz, 1H), 7.61 (s, 1H), 7.55 (t, *J* = 7.5 Hz, 1H), 7.14 (t, *J* = 7.5 Hz, 1H), 4.04 (s, 3H) ppm; <sup>13</sup>C NMR (125 MHz, CDCl<sub>3</sub>): δ 163.9, 160.4, 153.8, 144.2, 141.6, 138.9, 132.5 (q, *J* = 33.4 Hz), 131.5, 129.0, 126.3, 125.2, 124.8, 123.1, 122.5, 121.7, 120.1, 112.7, 53.3 ppm; IR (KBr, cm<sup>-1</sup>): 2921, 1734, 1645, 1555, 1439, 1428, 1412, 1382, 1325, 1290, 1276, 1254, 1230, 1193, 1171, 1122, 1065, 1018, 833; HRMS (ESI) calcd for C<sub>20</sub>H<sub>13</sub>F<sub>3</sub>NO<sub>3</sub><sup>+</sup> (M+H)<sup>+</sup> 372.0848, found 372.0849.

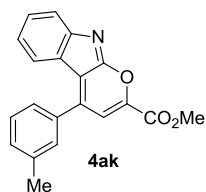

**4ak:** Prepared according to the general procedure III above and obtained as red solid (45.0mg, 71% yield, M.P. = 205 °C), eluent: DCM/EA = 20:1; <sup>1</sup>H NMR (500 MHz, CDCl<sub>3</sub>): δ 7.79 (d, *J* = 8.0 Hz, 1H), 7.73 (d, *J* = 8.0 Hz, 1H), 7.65 (s, 1H), 7.58 – 7.48

(m, 4H), 7.41 (d,  $J = 7.5$  Hz, 1H), 7.12 (t,  $J = 7.5$  Hz, 1H), 4.03 (s, 3H), 2.49 (s, 3H) ppm;  $^{13}\text{C}$  NMR (125 MHz,  $\text{CDCl}_3$ ):  $\delta$  164.2, 160.6, 153.5, 144.0, 143.9, 139.2, 135.3, 131.4, 130.8, 129.1, 129.0, 125.7, 124.4, 123.2, 122.1, 119.8, 113.5, 53.2, 21.4 ppm; IR (KBr,  $\text{cm}^{-1}$ ): 2920, 1748, 1646, 1603, 1553, 1442, 1429, 1366, 1321, 1295, 1275, 1255, 1192, 1136, 1117, 794, 780, 760, 707, 674; HRMS (ESI) calcd for  $\text{C}_{20}\text{H}_{16}\text{NO}_3^+$  ( $\text{M}+\text{H}$ ) $^+$  318.1130, found 318.1136.

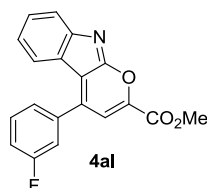

**4al:** Prepared according to the general procedure III above and obtained as red solid (50.7mg, 79% yield, M.P. = 204 °C), eluent: DCM/EA = 20:1;  $^1\text{H}$  NMR (500 MHz,  $\text{CDCl}_3$ ):  $\delta$  7.74 (t,  $J = 7.5$  Hz, 2H), 7.62 – 7.59 (m, 2H), 7.55 (t,  $J = 8.0$  Hz, 2H), 7.47 (d,  $J = 9.0$  Hz, 1H), 7.33 – 7.30 (m, 1H), 7.15 (t,  $J = 7.5$  Hz, 1H), 4.04 (s, 3H) ppm;  $^{13}\text{C}$  NMR (125 MHz,  $\text{CDCl}_3$ ):  $\delta$  164.0, 163.0 (d,  $J = 249.0$  Hz), 160.4, 153.6, 144.0, 141.9, 137.4 (d,  $J = 7.8$  Hz), 131.2, 131.1 (d,  $J = 8.3$  Hz), 124.8, 124.3, 123.2, 122.4, 121.8, 120.0, 117.6 (d,  $J = 20.9$  Hz), 115.6 (d,  $J = 22.5$  Hz), 113.0, 53.3 ppm; IR (KBr,  $\text{cm}^{-1}$ ): 2921, 1748, 1727, 1648, 1554, 1430, 1254, 1131, 801, 706; HRMS (ESI) calcd for  $\text{C}_{19}\text{H}_{13}\text{FNO}_3^+$  ( $\text{M}+\text{H}$ ) $^+$  322.0879, found 322.0880.

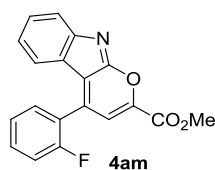

**4am:** Prepared according to the general procedure III above and obtained as red solid (48.8mg, 76% yield, M.P. = 226 °C), eluent: DCM/EA = 20:1;  $^1\text{H}$  NMR (500 MHz,  $\text{CDCl}_3$ ):  $\delta$  7.74 – 7.66 (m, 3H), 7.63 – 7.59 (m, 1H), 7.55 – 7.51 (m, 2H), 7.39 (t,  $J = 7.5$  Hz, 1H), 7.35 (t,  $J = 8.0$  Hz, 1H), 7.13 (t,  $J = 7.5$  Hz, 1H), 4.03 (s, 3H) ppm;  $^{13}\text{C}$  NMR (125 MHz,  $\text{CDCl}_3$ ):  $\delta$  164.0, 160.5, 159.5 (d,  $J = 251.1$  Hz), 153.7, 143.6, 137.4, 132.6 (d,  $J = 8.1$  Hz), 131.2, 130.5, 126.3, 124.9 (d,  $J = 3.0$  Hz), 123.4, 123.0 (d,  $J = 14.5$  Hz), 122.4, 122.1, 119.9, 116.8 (d,  $J = 20.9$  Hz), 113.6, 53.3 ppm; IR (KBr,  $\text{cm}^{-1}$ ):

3087, 2933, 1729, 1639, 1555, 1435, 1370, 1240, 1114, 932, 864, 761, 538, 454;  
HRMS (ESI) calcd for  $C_{19}H_{13}FNO_3^+$  (M+H)<sup>+</sup> 322.0879, found 322.0881.

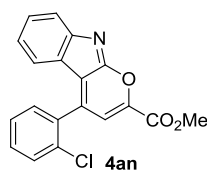

**4an**: Prepared according to the general procedure III above and obtained as red solid (42.5mg, 63% yield, M.P. = 201 °C), eluent: DCM/EA = 20:1; <sup>1</sup>H NMR (500 MHz, CDCl<sub>3</sub>): δ 7.73 (d, *J* = 8.0 Hz, 1H), 7.66 – 7.63 (m, 2H), 7.56 – 7.48 (m, 4H), 7.24 (d, *J* = 7.5 Hz, 1H), 7.09 (t, *J* = 7.5 Hz, 1H), 4.03 (s, 3H) ppm; <sup>13</sup>C NMR (125 MHz, CDCl<sub>3</sub>): δ 164.1, 160.5, 153.7, 143.6, 140.5, 134.0, 132.4, 131.4, 131.2, 130.6, 130.2, 127.4, 126.5, 123.5, 122.4, 122.1, 119.8, 113.7, 53.3 ppm; IR (KBr, cm<sup>-1</sup>): 2934, 1729, 1640, 1555, 1430, 1367, 1269, 1115, 1048, 756, 678, 566; HRMS (ESI) calcd for  $C_{19}H_{13}ClNO_3^+$  (M+H)<sup>+</sup> 338.0584, found 338.0583.

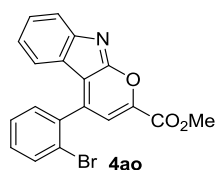

**4ao**: Prepared according to the general procedure III above and obtained as red solid (62.5mg, 82% yield, M.P. = 201 °C), eluent: DCM/EA = 20:1; <sup>1</sup>H NMR (500 MHz, CDCl<sub>3</sub>) δ 7.83 (d, *J* = 8.0 Hz, 1H), 7.72 (d, *J* = 7.5 Hz, 1H), 7.62 (s, 1H), 7.56 – 7.51 (m, 3H), 7.48 – 7.45 (m, 1H), 7.18 (t, *J* = 8.0 Hz, 1H), 7.09 (t, *J* = 7.5 Hz, 1H), 4.03 (s, 3H) ppm; <sup>13</sup>C NMR (125 MHz, CDCl<sub>3</sub>): δ 164.1, 160.5, 153.7, 143.6, 141.9, 136.0, 133.8, 131.4, 131.2, 130.1, 128.0, 126.3, 123.5, 122.4, 122.1, 121.5, 119.8, 113.7, 53.3 ppm; IR (KBr, cm<sup>-1</sup>): 3842, 3741, 1728, 1642, 1554, 1431, 1371, 1269, 1117, 758, 617, 597; HRMS (ESI) calcd for  $C_{19}H_{13}BrNO_3^+$  (M+H)<sup>+</sup> 382.0079, found 382.0081.

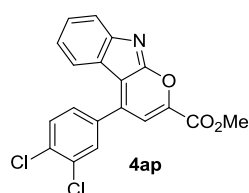

**4ap:** Prepared according to the general procedure III above and obtained as red solid (60.1mg, 88% yield, M.P. = 221 °C), eluent: DCM/EA = 20:1; <sup>1</sup>H NMR (500 MHz, CDCl<sub>3</sub>): δ 7.86 (s, 1H), 7.75 – 7.71 (m, 3H), 7.64 – 7.62 (m, 1H), 7.59 – 7.55 (m, 2H), 7.17 (t, *J* = 7.5 Hz, 1H), 4.05 (s, 3H) ppm; <sup>13</sup>C NMR (125 MHz, CDCl<sub>3</sub>): δ 163.9, 160.4, 153.8, 144.2, 140.6, 135.1, 135.1, 133.9, 131.5, 131.4, 130.3, 127.8, 125.0, 123.1, 122.6, 121.7, 120.2, 112.5, 53.4 ppm; IR (KBr, cm<sup>-1</sup>): 3085, 2950, 1732, 1640, 1556, 1470, 1432, 1358, 1320, 1292, 1260, 1189, 1127, 1024, 939, 873, 830, 761, 678, 580, 516, 459, 427; HRMS (ESI) calcd for C<sub>19</sub>H<sub>12</sub>Cl<sub>2</sub>NO<sub>3</sub><sup>+</sup> (M+H)<sup>+</sup> 372.0194, found 372.0193.

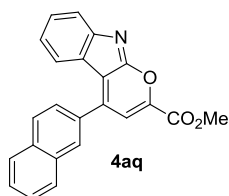

**4aq:** Prepared according to the general procedure III above and obtained as red solid (60.7 mg, 86% yield, M.P. = 238 °C), eluent: DCM/EA = 20:1; <sup>1</sup>H NMR (500 MHz, CDCl<sub>3</sub>): δ 8.26 (s, 1H), 8.07 (d, *J* = 7.0 Hz, 1H), 7.97 (t, *J* = 8.5Hz, 1H), 7.84 – 7.74 (m, 4H), 7.66 – 7.61 (m, 2H), 7.53 (t, *J* = 8.0 Hz, 1H), 7.09 (t, *J* = 7.5 Hz, 1H), 4.05 (s, 3H) ppm; <sup>13</sup>C NMR (125 MHz, CDCl<sub>3</sub>): δ 164.2, 160.6, 153.6, 144.0, 143.7, 134.1, 133.1, 132.6, 130.9, 129.2, 128.7, 128.0, 127.9, 127.3, 125.3, 124.6, 123.2, 122.2, 119.9, 113.5, 53.3 ppm; IR (KBr, cm<sup>-1</sup>): 3053, 2957, 2361, 1734, 1637, 1552, 1433, 1368, 1280, 1257, 1226, 1191, 1141, 1116, 1008, 934, 869, 819, 759, 676, 544, 493, 437, 404; HRMS (ESI) calcd for C<sub>23</sub>H<sub>16</sub>NO<sub>3</sub><sup>+</sup> (M+H)<sup>+</sup> 354.1130, found 354.1128.

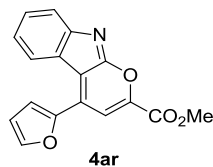

**4ar:** Prepared according to the general procedure III above and obtained as red solid (50.4mg, 86% yield, M.P. = 232 °C), eluent: DCM/EA = 20:1; <sup>1</sup>H NMR (500 MHz, CDCl<sub>3</sub>): δ 8.68 (d, *J* = 7.5 Hz, 1H), 7.93 (s, 1H), 7.78 (s, 1H), 7.72 (d, *J* = 8.0 Hz, 1H), 7.57 (t, *J* = 7.5 Hz, 1H), 7.37 (d, *J* = 5.6 Hz, 1H), 7.31 (t, *J* = 7.5 Hz, 1H), 6.77 – 6.77 (m, 1H), 4.05 (s, 3H) ppm; <sup>13</sup>C NMR (125 MHz, CDCl<sub>3</sub>): δ 164.5, 160.6, 153.3, 150.1,

146.7, 143.6, 130.6, 129.1, 125.3, 122.5, 119.7, 116.8, 113.4, 109.1, 53.3 ppm; IR (KBr,  $\text{cm}^{-1}$ ): 3136, 2920, 2850, 1741, 1634, 1572, 1546, 1427, 1362, 1264, 1152, 756, 701; HRMS (ESI) calcd for  $\text{C}_{17}\text{H}_{12}\text{NO}_4^+$  ( $\text{M}+\text{H}$ ) $^+$  294.0766, found 294.0769.

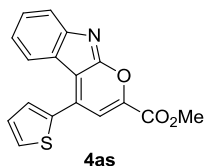

**4as**: Prepared according to the general procedure III above and obtained as red solid (45.7mg, 74% yield, M.P. = 228 °C), eluent: DCM/EA = 20:1;  $^1\text{H}$  NMR (500 MHz,  $\text{CDCl}_3$ ):  $\delta$  8.26 (d,  $J = 7.5$  Hz, 1H), 7.86 (d,  $J = 3.0$  Hz, 1H), 7.73 – 7.72 (m, 2H), 7.69 (s, 1H), 7.55 (t,  $J = 7.5$  Hz, 1H), 7.32 (t,  $J = 9.0$  Hz, 1H), 7.19 (t,  $J = 7.5$  Hz, 1H), 4.04 (s, 3H) ppm;  $^{13}\text{C}$  NMR (125 MHz,  $\text{CDCl}_3$ ):  $\delta$  164.2, 160.5, 153.3, 143.6, 137.1, 136.5, 131.0, 130.8, 130.6, 128.6, 123.1, 122.2, 119.9, 113.3, 53.3 ppm; IR (KBr,  $\text{cm}^{-1}$ ): 2920, 1727, 1632, 1553, 1416, 1369, 1280, 1252, 1203, 1136, 1114, 1002, 758, 721, 677, 611, 506, 440; HRMS (ESI) calcd for  $\text{C}_{17}\text{H}_{12}\text{NO}_3\text{S}^+$  ( $\text{M}+\text{H}$ ) $^+$  310.0538, found 310.0543.

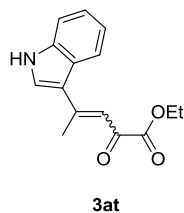

**3at**: Prepared according to the general procedure III above and obtained as yellow solid (39.1 mg, 70% yield,  $E/Z = 90:10$ , M.P. = 175 °C), eluent: DCM/EA = 30:1;  $^1\text{H}$  NMR (500 MHz,  $\text{DMSO}-d_6$ ):  $\delta$  12.06 (br, 1H), 8.16 (d,  $J = 3.0$  Hz, 1H), 7.96 – 7.94 (m, 1H), 7.51 (t,  $J = 4.5$  Hz, 1H), 7.39 (s, 1H), 7.26 – 7.22 (m, 2H), 4.27 (q,  $J = 7.0$  Hz, 2H), 2.69 (s, 3H), 1.31 (t,  $J = 7.0$  Hz, 3H) ppm;  $^{13}\text{C}$  NMR (125 MHz,  $\text{DMSO}-d_6$ ):  $\delta$  181.2, 163.3, 157.1, 137.8, 132.1, 124.2, 122.7, 121.6, 120.4, 117.2, 112.8, 112.6, 61.5, 18.8, 13.9 ppm; IR (KBr,  $\text{cm}^{-1}$ ): 3420, 3207, 2919, 1723, 1646, 1578, 1541, 1478, 1490, 1249, 1093, 1021, 737, 609, 570, 491; HRMS (ESI) calcd for  $\text{C}_{15}\text{H}_{15}\text{NNaO}_3^+$  ( $\text{M}+\text{Na}$ ) $^+$  280.0950, found 280.0953.

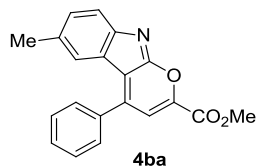

**4ba:** Prepared according to the general procedure III above and obtained as red solid (39.3mg, 62% yield, M.P. = 229 °C), eluent: DCM/EA = 20:1; <sup>1</sup>H NMR (500 MHz, CDCl<sub>3</sub>): δ 7.77 – 7.76 (m, 2H), 7.62 – 7.60 (m, 5H), 7.56 (s, 1H), 7.35 (d, *J* = 8.0 Hz, 1H), 4.03 (s, 3H), 2.34 (s, 3H) ppm; <sup>13</sup>C NMR (125 MHz, CDCl<sub>3</sub>): δ 163.8, 160.7, 151.5, 143.8, 143.3, 135.5, 132.1, 131.6, 130.6, 129.2, 128.5, 124.5, 123.3, 122.2, 119.4, 113.4, 53.2, 21.5 ppm; IR (KBr, cm<sup>-1</sup>): 2920, 2853, 1719, 1642, 1554, 1493, 1438, 1364, 1303, 1248, 1161, 1113, 1031, 942, 866, 814, 757, 694, 663, 612, 541, 472, 432; HRMS (ESI) calcd for C<sub>20</sub>H<sub>16</sub>NO<sub>3</sub><sup>+</sup> (M+H)<sup>+</sup> 318.1130, found 318.1132.

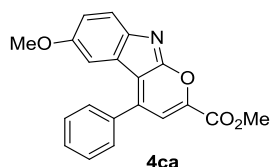

**4ca:** Prepared according to the general procedure III above and obtained as red solid (60.6mg, 91% yield, M.P. = 220 °C), eluent: DCM/EA = 20:1; <sup>1</sup>H NMR (500 MHz, CDCl<sub>3</sub>): δ 7.76 (d, *J* = 6.5 Hz, 2H), 7.62 – 7.58 (m, 5H), 7.28 (s, 1H), 7.14 – 7.12 (m, 1H), 4.03 (s, 3H), 3.71 (s, 3H) ppm; <sup>13</sup>C NMR (125 MHz, CDCl<sub>3</sub>): δ 163.2, 160.6, 155.3, 147.7, 144.0, 143.7, 135.2, 130.7, 129.2, 128.5, 124.7, 122.6, 120.2, 118.1, 113.0, 107.7, 55.7, 53.2 ppm; IR (KBr, cm<sup>-1</sup>): 3017, 2950, 1723, 1642, 1565, 1471, 1433, 1366, 1299, 1279, 1200, 1163, 1124, 1028, 952, 851, 814, 760, 704, 660, 611, 540, 512, 428, 403; HRMS (ESI) calcd for C<sub>20</sub>H<sub>16</sub>NO<sub>4</sub><sup>+</sup> (M+H)<sup>+</sup> 334.1079, found 334.1083.

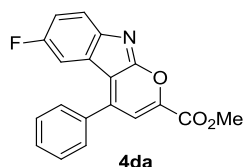

**4da:** Prepared according to the general procedure III above and obtained as red solid (27.6mg, 43% yield, M.P. = 239 °C), eluent: DCM/EA = 20:1; <sup>1</sup>H NMR (500 MHz, CDCl<sub>3</sub>): δ 7.76 – 7.74 (m, 2H), 7.67 – 7.62 (m, 5H), 7.45 – 7.43 (m, 1H), 7.27 – 7.23

(m, 1H), 4.04 (s, 3H) ppm;  $^{13}\text{C}$  NMR (125 MHz,  $\text{CDCl}_3$ ):  $\delta$  163.9, 160.4, 158.6 (d,  $J = 237.6$  Hz), 149.6, 145.1, 144.5, 134.9, 131.0, 129.5, 128.4, 124.2, 122.5 (d,  $J = 9.6$  Hz), 120.6 (d,  $J = 8.3$  Hz), 118.2 (d,  $J = 24.3$  Hz), 113.1, 109.4 (d,  $J = 25.4$  Hz), 53.3 ppm; IR (KBr,  $\text{cm}^{-1}$ ): 2922, 2853, 1722, 1644, 1564, 1465, 1428, 1366, 1307, 1261, 1157, 1120, 864, 812, 757, 701, 658, 613, 538, 474, 453, 406; HRMS (ESI) calcd for  $\text{C}_{19}\text{H}_{13}\text{FNO}_3^+$  ( $\text{M}+\text{H}$ ) $^+$  322.0879, found 322.0880.

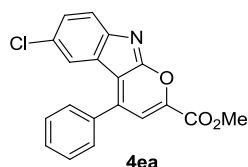

**4ea:** Prepared according to the general procedure III above and obtained as red solid (35.0mg, 52% yield, M.P. = 266 °C), eluent: DCM/EA = 20:1;  $^1\text{H}$  NMR (500 MHz,  $\text{CDCl}_3$ ):  $\delta$  7.76 – 7.73 (m, 3H), 7.68 – 7.65 (m, 5H), 7.50 – 7.48 (m, 1H), 4.05 (s, 3H) ppm;  $^{13}\text{C}$  NMR (125 MHz,  $\text{CDCl}_3$ ):  $\delta$  164.2, 160.4, 151.8, 145.4, 144.6, 134.9, 131.1, 130.8, 129.5, 128.4, 127.5, 123.6, 123.2, 122.8, 120.9, 113.4, 53.4 ppm; IR (KBr,  $\text{cm}^{-1}$ ): 2929, 1715, 1639, 1545, 1429, 1363, 1300, 1249, 1114, 862, 756, 691, 603, 532, 442; HRMS (ESI) calcd for  $\text{C}_{19}\text{H}_{13}\text{ClNO}_3^+$  ( $\text{M}+\text{H}$ ) $^+$  338.0584, found 338.0586.

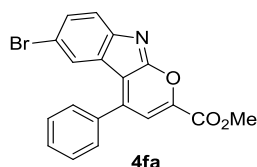

**4fa:** Prepared according to the general procedure III above and obtained as red solid (31.2mg, 41% yield, M.P. = 259 °C), eluent: DCM/EA = 20:1;  $^1\text{H}$  NMR (500 MHz,  $\text{CDCl}_3$ ):  $\delta$  7.89 (s, 1H), 7.77 – 7.75 (m, 2H), 7.69 (s, 1H), 7.66 – 7.61 (m, 5H), 4.05 (s, 3H) ppm;  $^{13}\text{C}$  NMR (125 MHz,  $\text{CDCl}_3$ ):  $\delta$  164.2, 160.4, 151.8, 145.4, 144.6, 134.9, 131.1, 130.8, 129.5, 128.4, 127.5, 123.6, 123.2, 122.8, 120.9, 113.4, 53.4 ppm; IR (KBr,  $\text{cm}^{-1}$ ): 3802, 3690, 3649, 3327, 2955, 2549, 2192, 1942, 1718, 1645, 1552, 1460, 1434, 1363, 1297, 1255, 1192, 1125, 1014, 852, 819, 788, 759, 694, 622, 600; HRMS (ESI) calcd for  $\text{C}_{19}\text{H}_{13}\text{BrNO}_3^+$  ( $\text{M}+\text{H}$ ) $^+$  382.0079, found 382.0081.

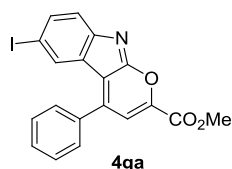

**4ga:** Prepared according to the general procedure III above and obtained as red solid (53.2mg, 62% yield, M.P. = 270 °C), eluent: DCM/EA = 20:1;  $^1\text{H}$  NMR (500 MHz,  $\text{CDCl}_3$ ):  $\delta$  7.88 (d,  $J$  = 1.5 Hz, 1H), 7.76 – 7.74 (m, 2H), 7.69 (s, 1H), 7.64 – 7.62 (m, 4H), 7.26 – 7.24 (m, 1H), 4.04 (s, 3H) ppm;  $^{13}\text{C}$  NMR (125 MHz,  $\text{CDCl}_3$ ):  $\delta$  164.7, 160.4, 154.5, 144.6, 144.4, 135.0, 130.9, 129.4, 128.5, 125.3, 124.8, 124.1, 123.7, 123.0, 120.9, 113.7, 53.4 ppm; IR (KBr,  $\text{cm}^{-1}$ ): 2926, 1713, 1637, 1539, 1424, 1360, 1296, 1249, 1110, 758, 687, 592, 534; HRMS (ESI) calcd for  $\text{C}_{19}\text{H}_{13}\text{INO}_3^+$  ( $\text{M}+\text{H}$ ) $^+$  429.9935, found 429.9939.

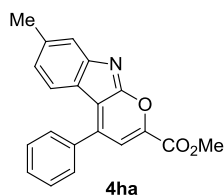

**4ha:** Prepared according to the general procedure III above and obtained as red solid (45.6mg, 72% yield, M.P. = 235 °C), eluent: DCM/EA = 20:1;  $^1\text{H}$  NMR (500 MHz,  $\text{CDCl}_3$ ):  $\delta$  7.76 – 7.75 (m, 2H), 7.66 – 7.59 (m, 5H), 7.52 (s, 1H), 6.93 (d,  $J$  = 8.0 Hz, 1H), 4.02 (s, 3H), 2.49 (s, 3H) ppm;  $^{13}\text{C}$  NMR (125 MHz,  $\text{CDCl}_3$ ):  $\delta$  163.5, 159.7, 152.9, 142.4, 141.3, 140.9, 134.5, 129.5, 128.2, 127.5, 123.5, 122.4, 121.9, 119.2, 118.6, 112.5, 52.2, 21.4 ppm; IR (KBr,  $\text{cm}^{-1}$ ): 2922, 1716, 1643, 1551, 1442, 1358, 1302, 1242, 1124, 1021, 944, 869, 763, 703, 571, 512, 419; HRMS (ESI) calcd for  $\text{C}_{20}\text{H}_{16}\text{NO}_3^+$  ( $\text{M}+\text{H}$ ) $^+$  318.1130, found 318.1134.

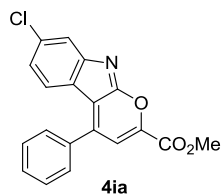

**4ia:** Prepared according to the general procedure III above and obtained as red solid (44.5mg, 66% yield, M.P. = 242 °C), eluent: dichloromethane/ethyl acetate (20:1);  $^1\text{H}$  NMR (500 MHz,  $\text{CDCl}_3$ ):  $\delta$  7.76 – 7.75 (m, 2H), 7.69 – 7.67 (m, 3H), 7.64 – 7.62 (m, 3H), 7.09 – 7.07 (m, 1H), 4.04 (s, 3H) ppm;  $^{13}\text{C}$  NMR (125 MHz,  $\text{CDCl}_3$ ):  $\delta$  164.9,



160.4, 154.4, 144.3, 144.2, 136.5, 135.0, 130.9, 129.4, 128.5, 123.9, 123.6, 122.5, 120.5, 120.0, 113.6, 53.3 ppm; IR (KBr,  $\text{cm}^{-1}$ ): 2924, 2117, 1735, 1638, 1544, 1429, 1357, 1246, 1125, 1063, 767, 705, 612, 482, 425; HRMS (ESI) calcd for  $\text{C}_{19}\text{H}_{13}\text{ClNO}_3^+$  ( $\text{M}+\text{H}$ ) $^+$  338.0584, found 338.0587.

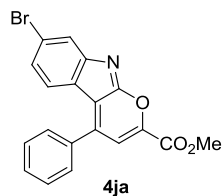

**4ja:** Prepared according to the general procedure III above and obtained as red solid (42.7mg, 56% yield, M.P. = 246 °C), eluent: DCM/EA = 20:1;  $^1\text{H}$  NMR (500 MHz,  $\text{CDCl}_3$ ):  $\delta$  7.88 (s, 1H), 7.76 – 7.74 (m, 2H), 7.69 (s, 1H), 7.64 – 7.62 (m, 4H), 7.26 – 7.24 (m, 1H), 4.04 (s, 3H) ppm;  $^{13}\text{C}$  NMR (125 MHz,  $\text{CDCl}_3$ ):  $\delta$  164.1, 160.4, 152.2, 145.4, 144.6, 134.8, 133.5, 131.2, 129.5, 128.4, 125.7, 123.8, 123.5, 121.3, 115.0, 113.5, 53.4 ppm; IR (KBr,  $\text{cm}^{-1}$ ): 3045, 2929, 1732, 1636, 1537, 1417, 1355, 1241, 1122, 1050, 933, 869, 760, 701, 541; HRMS (ESI) calcd for  $\text{C}_{19}\text{H}_{13}\text{BrNO}_3^+$  ( $\text{M}+\text{H}$ ) $^+$  382.0079, found 382.0077.

## V. Cyclic Voltammetry (CV) Experiments

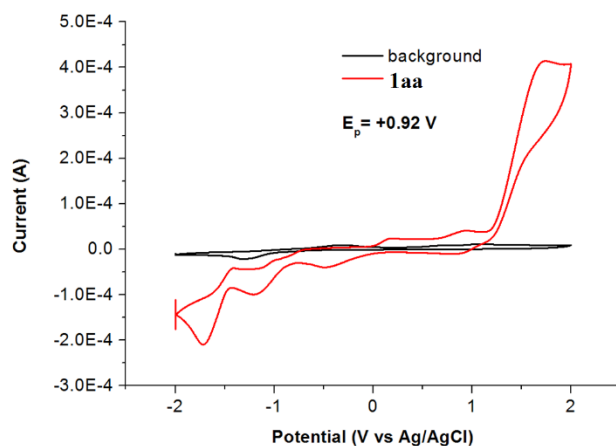

**Figure S2.** Cyclic voltammograms of **1aa** ( $2 \times 10^{-2}$  M) in electrolyte solution (0.02 M  $n\text{Bu}_4\text{NPF}_6$  in  $\text{CH}_3\text{CN}$ ) using a glassy carbon working electrode, Pt wire and Ag/AgCl as counter and reference electrode at 100 mV/s scan rate.

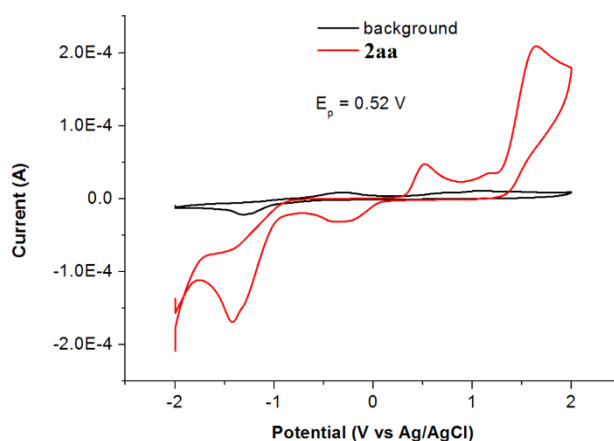

**Figure S3.** Cyclic voltammograms of **2aa** ( $2 \times 10^{-2}$  M) in electrolyte solution (0.02 M  $n\text{Bu}_4\text{NPF}_6$  in  $\text{CH}_3\text{CN}$ ) using a glassy carbon working electrode, Pt wire and Ag/AgCl as counter and reference electrode at 100 mV/s scan rate.

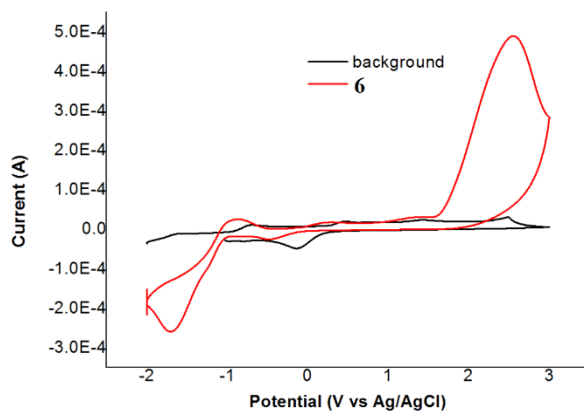

**Figure S4.** Cyclic voltammograms of **6** ( $2 \times 10^{-2}$  M) in electrolyte solution (0.03 M  $n\text{Bu}_4\text{NPF}_6$  in  $\text{CH}_3\text{CN}$ ) using a glassy carbon working electrode, Pt wire and Ag/AgCl as counter and reference electrode at 100 mV/s scan rate.

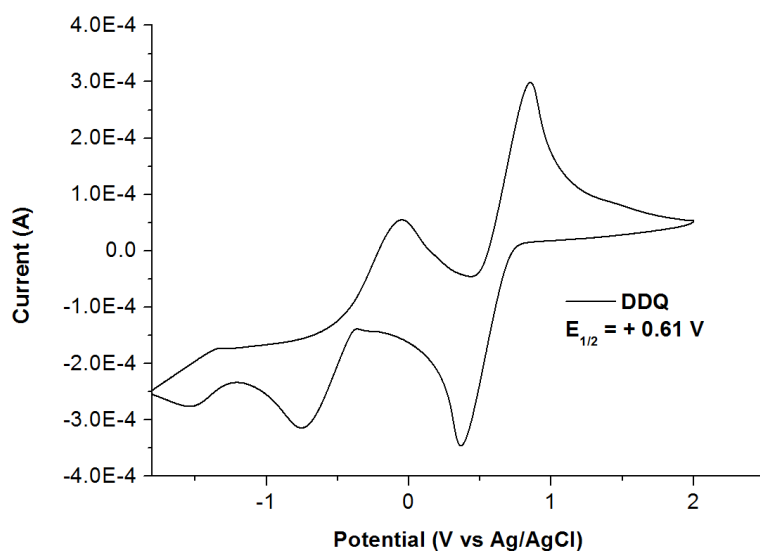

**Figure S5.** Cyclic voltammograms of **DDQ** ( $2 \times 10^{-2}$  M) in electrolyte solution (0.03 M  $n\text{Bu}_4\text{NPF}_6$  in  $\text{CH}_3\text{CN}$ ) using a glassy carbon working electrode, Pt wire and Ag/AgCl as counter and reference electrode at 100 mV/s scan rate.

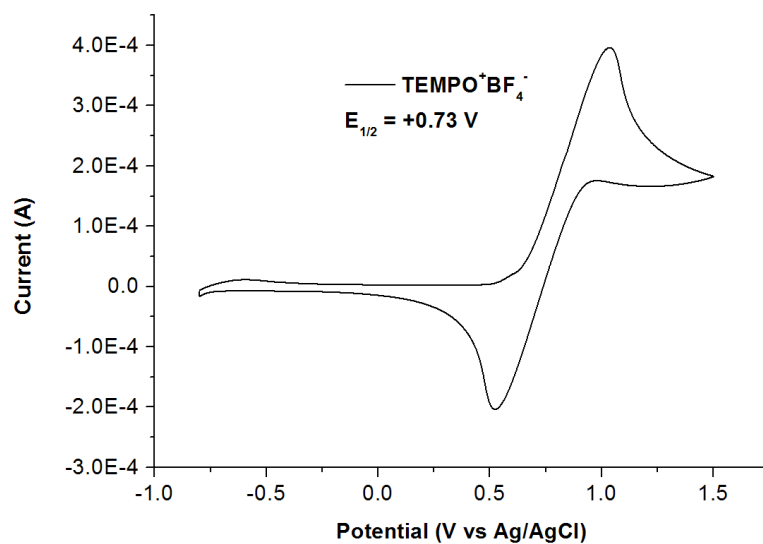

**Figure S6.** Cyclic voltammograms of TEMPO<sup>+</sup>BF<sub>4</sub><sup>-</sup> ( $2 \times 10^{-2}$  M) in electrolyte solution (0.02 M *n*Bu<sub>4</sub>NPF<sub>6</sub> in CH<sub>3</sub>CN) using a glassy carbon working electrode, Pt wire and Ag/AgCl as counter and reference electrode at 100 mV/s scan rate.

## VI. Radical Trapping Experiments

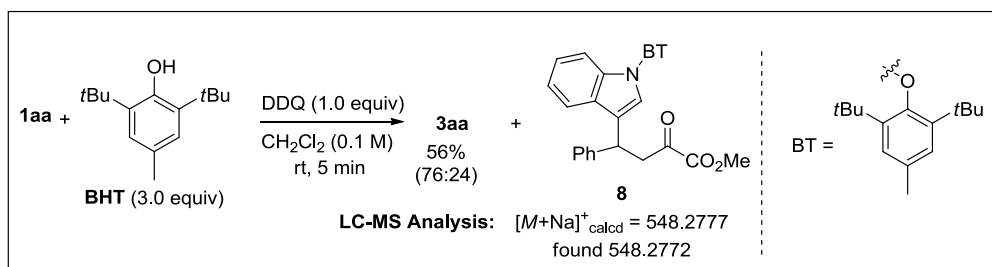

**A) BHT as radical trapping reagent in the reaction of 1aa:** Compound **1aa** (0.1 mmol), DDQ (0.1 mmol) and BHT (0.3 mmol) was dissolved in DCM (1.0 ml). The solution was stirred at room temperature for 5 minutes, quenched with CH<sub>3</sub>CN. The mixture was analyzed by LC-MS. The product **3aa** was obtained in 56% yield and with 76:24 *E/Z* value.

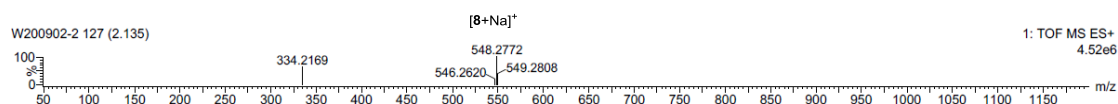

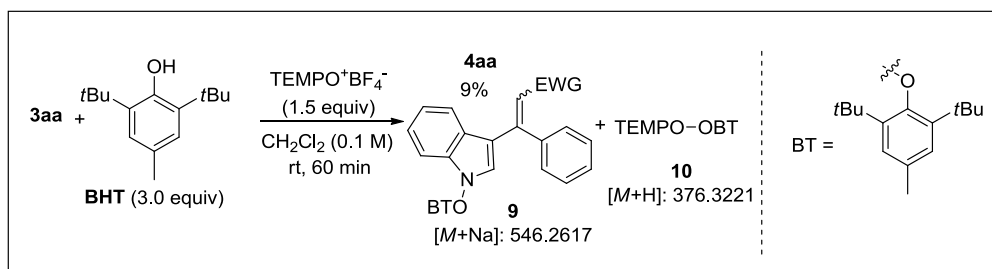

**B) BHT as radical trapping reagent in the reaction of 3aa:** Compound **3aa** (0.1 mmol),  $\text{TEMPO}^+\text{BF}_4^-$  (0.15 mmol) and BHT (0.3 mmol) was dissolved in DCM (1.0 ml). The solution was stirred at room temperature for 60 minutes, quenched with  $\text{CH}_3\text{CN}$ . The mixture was analyzed by LC-MS. The product **4aa** was obtained in 9% yield.

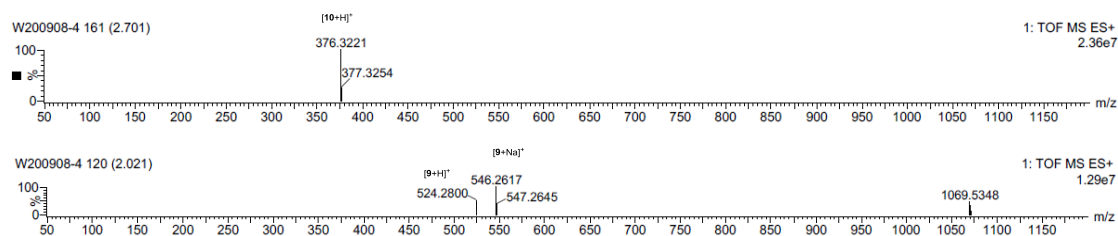

## VII. Control Experiments

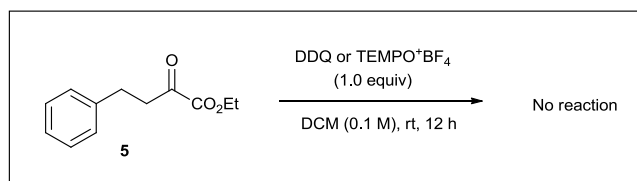

**A) Oxidative reaction of ethyl 2-oxo-4-phenylbutanoate **5**:** Compound **5** (0.1 mmol), DDQ (0.1 mmol) or TEMPO<sup>+</sup>BF<sub>4</sub><sup>-</sup> (0.1 mmol) as an oxidant was dissolved in DCM (1.0 mL). The solution was stirred at room temperature for 12 h. No reaction was observed.

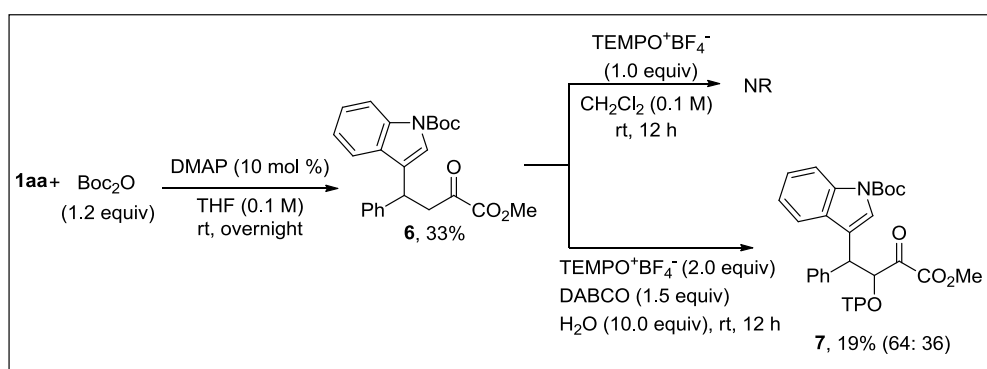

**B) Synthesis and oxidative reaction of *N*-Boc indolyl derivative **6**:** To a solution of THF (10 mL) were added **1aa** (1 mmol, 307 mg), Boc<sub>2</sub>O (1.2 mmol, 262 mg) and DMAP (0.1 mmol, 12 mg). The reaction mixture was stirred at room temperature for overnight. The reaction mixture was stirred at room temperature overnight. After reaction, the mixture was concentrated under vacuum. Purification of mixture by column chromatography (eluent: PE/EA = 12:1, v/v) on silica gel gave the desired product **6** (light yellow oil, 135 mg, 33% yield); <sup>1</sup>H NMR (500 MHz, CDCl<sub>3</sub>): δ 8.07 (s, 1H), 7.50 (s, 1H), 7.32 (d, *J* = 7.0 Hz, 3H), 7.27 – 7.24 (m, 3H), 7.18 (t, *J* = 7.0 Hz, 1H), 7.11 (t, *J* = 7.5 Hz, 1H), 4.82 (t, *J* = 7.5 Hz, 1H), 3.80 (s, 3H), 3.67 (dd, *J* = 7.0, 17.5 Hz, 1H), 3.59 (dd, *J* = 8.0, 17.5 Hz, 1H), 1.67 (s, 9H) ppm; <sup>13</sup>C NMR (125 MHz, CDCl<sub>3</sub>): δ 192.0, 161.2, 149.8, 142.0, 135.7, 129.5, 128.7, 127.9, 127.0, 124.6, 122.7, 122.5, 119.7, 115.3, 83.8, 53.0, 45.2, 37.4, 28.2 ppm. Compound **6** (0.1 mmol), TEMPO<sup>+</sup>BF<sub>4</sub><sup>-</sup> (0.10 mmol) was dissolved in DCM (1.0 ml). The solution was stirred

at room temperature for 12 h, but the reaction didn't work. Compound **6** (0.1 mmol), TEMPO<sup>+</sup>BF<sub>4</sub><sup>-</sup> (0.2 mmol), H<sub>2</sub>O (1.0 mmol) and DABCO (0.15 mmol) was dissolved in DCM (1.0 mL). The solution was stirred at room temperature for 12 h. Purification of mixture by column chromatography on silica gel (eluent: PE/EA = 10:1, v/v) gave the desired product **7** (light yellow oil, 10.7 mg, 19% yield, dr = 59:41). <sup>1</sup>H NMR (500 MHz, CDCl<sub>3</sub>): δ 8.07 – 8.05 (m, 1.7H), 7.82 (s, 1H), 7.63 (d, *J* = 7.5 Hz, 0.7H), 7.52 (s, 1H), 7.37 (d, *J* = 7.0 Hz, 3.4H), 7.25 (d, *J* = 7.0 Hz, 4.8H), 7.22 – 7.18 (m, 3.4H), 7.07 (t, *J* = 7.5 Hz, 1H), 6.09 (d, *J* = 9.5 Hz, 0.7H), 5.96 (d, *J* = 10.0 Hz, 1H), 4.84 – 4.79 (m, 1.7H), 3.75 (s, 3H), 3.74 (s, 2.1H), 1.68 (s, 9H), 1.65 (s, 6.3H), 1.49 – 1.44 (m, 2.8H), 1.38 – 1.36 (m, 4H), 1.32 – 1.28 (m, 3.4H), 1.17 (s, 2.1H), 1.11 (s, 3H), 1.04 (s, 3H), 0.99 (s, 4.2H), 0.94 (s, 3H), 0.59 (s, 5.1H) ppm; <sup>13</sup>C NMR (125 MHz, CDCl<sub>3</sub>): δ 195.6, 195.0, 161.7, 161.7, 149.8, 139.3, 138.8, 129.4, 128.9, 128.7, 128.2, 127.2, 127.0, 124.5, 124.3, 124.2, 123.5, 122.4, 122.4, 120.1, 119.7, 115.0, 114.9, 83.6, 83.0, 61.6, 61.3, 60.2, 60.1, 52.8, 52.8, 43.8, 43.4, 40.6, 40.5, 40.1, 40.1, 34.0, 33.8, 28.2, 20.7, 20.3, 20.0, 17.0, 17.0 ppm; IR (KBr, cm<sup>-1</sup>): 2933, 1731, 1453, 1371, 1255, 1156, 1075, 733, 700; HRMS (ESI) calcd for C<sub>33</sub>H<sub>43</sub>N<sub>2</sub>O<sub>6</sub><sup>+</sup> (M+H)<sup>+</sup> 563.3116, found 563.3118.

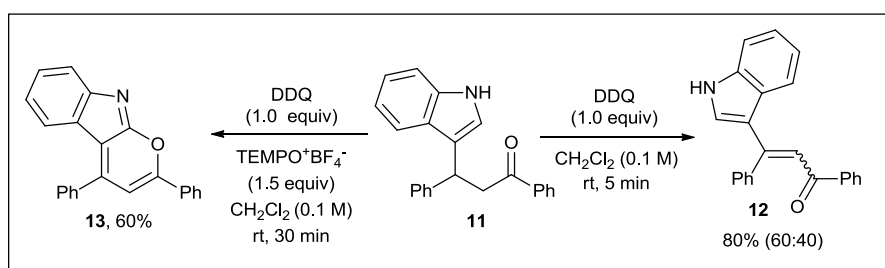

### C) Oxidative reaction of 3-(1H-indol-3-yl)-1,3-diphenylpropan-1-one **11**:

Compound **11** (0.2 mmol) and DDQ (0.2 mmol) was dissolved in DCM (2.0 mL). The solution was stirred at room temperature for 5 minutes. Purification of mixture by column chromatography on silica gel (DCM/EA = 30:1, v/v) gave the desired product **12** (yellow solid, 51.7mg, 80% yield, *E/Z* = 60:40, M.P. = 189 °C); <sup>1</sup>H NMR (500 MHz, DMSO) δ 11.74 (s, 1H), 11.42 (s, 0.66H), 7.92 – 7.90 (m, 2H), 7.88 (d, *J* = 8.0 Hz, 1.32H), 7.57 – 7.40 (m, 10.30H), 7.38 – 7.34 (m, 5.30H), 7.27 – 7.23 (m, 3H),



7.19 (t,  $J = 7.5$  Hz, 1H), 7.09 (t,  $J = 7.5$  Hz, 1H), 7.03 (t,  $J = 7.5$  Hz, 0.66H), 6.99 (s, 0.66H), 6.81 (t,  $J = 7.5$  Hz, 0.66H), 6.68 (d,  $J = 8.0$  Hz, 0.66H) ppm;  $^{13}\text{C}$  NMR (125 MHz, DMSO)  $\delta$  major: 189.9, 151.5, 140.4, 139.2, 137.4, 132.1, 130.4, 129.0, 128.6, 128.5, 127.9, 127.7, 125.0, 122.2, 120.7, 120.2, 117.1, 116.8, 112.5 ppm; minor: 191.5, 147.9, 141.8, 138.3, 136.2, 132.2, 129.5, 129.2, 128.4, 128.3, 128.1, 127.7, 126.4, 121.9, 121.3, 119.9, 119.3, 112.9, 111.8 ppm; IR (KBr,  $\text{cm}^{-1}$ ): 3442, 3223, 2927, 1631, 1541, 1491, 1434, 1341, 1225, 1135, 1028, 842, 700, 595, 419; HRMS (ESI) calcd for  $\text{C}_{23}\text{H}_{17}\text{NNaO}^+$  ( $\text{M}+\text{Na}$ ) $^+$  346.1202, found 346.1211. Compound **11** (0.2 mmol), DDQ (0.2 mmol) and  $\text{TEMPO}^+\text{BF}_4^-$  (0.3 mmol) was dissolved in DCM (2.0 mL). After reaction, the mixture was diluted with DCM and washed with saturated sodium carbonate aqueous solution and saturated sodium chloride aqueous solution. The organic layer was dried over  $\text{MgSO}_4$ , filtered and concentrated under vacuum. The solution was stirred at room temperature. Purification of mixture by column chromatography on silica gel (DCM/EA = 20:1, v/v) gave the desired product **13** (red solid, 38.5mg, 60% yield, M.P. = 228 °C), which is a known compound.<sup>3</sup>  $^1\text{H}$  NMR (500 MHz,  $\text{CDCl}_3$ ):  $\delta$  8.05 (d,  $J = 6.5$  Hz, 2H), 7.79 (d,  $J = 6.5$  Hz, 2H), 7.72(t,  $J = 9.0$  Hz, 2H), 7.63 – 7.58 (m, 3H), 7.52 – 7.45 (m, 4H), 7.16 (s, 1H), 7.08(t,  $J = 7.5$  Hz, 1H) ppm;  $^{13}\text{C}$  NMR (125 MHz,  $\text{CDCl}_3$ ):  $\delta$  163.3, 154.0, 150.2, 144.6, 134.5, 129.7, 128.9, 128.2, 127.1, 127.1, 126.4, 124.0, 120.6, 120.3, 119.4, 117.3, 117.2, 102.7 ppm.

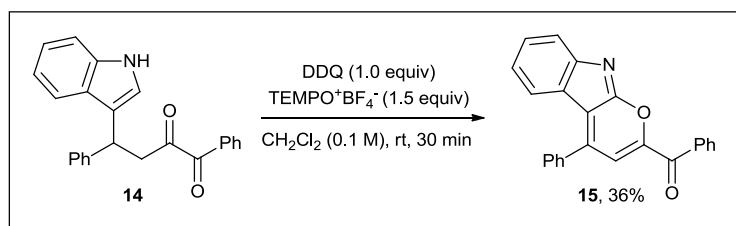

#### D) Oxidative reaction of 4-(1H-indol-3-yl)-1,4-diphenylbutan-1,2-dione **14**:

Compound **14** (0.2 mmol), DDQ (0.2 mmol) and  $\text{TEMPO}^+\text{BF}_4^-$  (0.3 mmol) was dissolved in DCM (2.0 mL). After reaction, the mixture was diluted with DCM and washed with saturated sodium carbonate aqueous solution and saturated sodium chloride aqueous solution. The organic layer was dried over  $\text{MgSO}_4$ , filtered and

concentrated under vacuum. The solution was stirred at room temperature. Purification of mixture by column chromatography on silica gel (DCM) gave the desired product **15** (red solid, 25.8 mg, 36% yield, M.P. = 182 °C); <sup>1</sup>H NMR (500 MHz, CDCl<sub>3</sub>): δ 8.15 (d, *J* = 8.0 Hz, 2H), 7.83 – 7.80 (m, 3H), 7.74 (d, *J* = 8.0 Hz, 1H), 7.70 – 7.63 (m, 5H), 7.58 – 7.53 (m, 3H), 7.15 (t, *J* = 7.5 Hz, 1H) ppm; <sup>13</sup>C NMR (100 MHz, CDCl<sub>3</sub>): δ 186.1, 163.9, 153.5, 150.9, 144.5, 135.5, 135.3, 133.8, 131.0, 130.7, 130.3, 129.3, 128.7, 128.6, 124.1, 123.3, 122.3, 119.8, 113.4 ppm; IR (KBr, cm<sup>-1</sup>): 1627, 1551, 525; HRMS (ESI) calcd for C<sub>24</sub>H<sub>16</sub>NO<sub>2</sub><sup>+</sup> (M+H)<sup>+</sup> 350.1181, found 350.1181.

## VIII. X-ray Structure

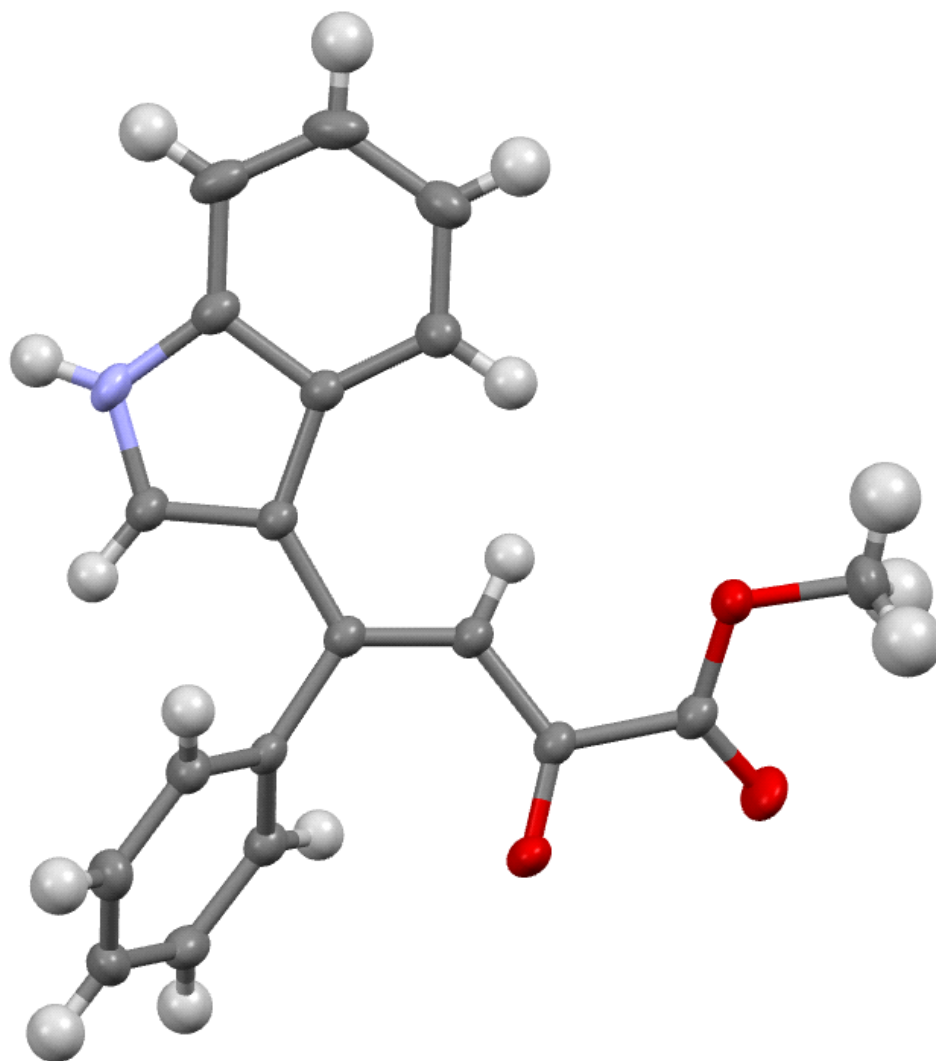

**Figure S6. X-ray structure of compound 3aa (CCDC 2050910)**

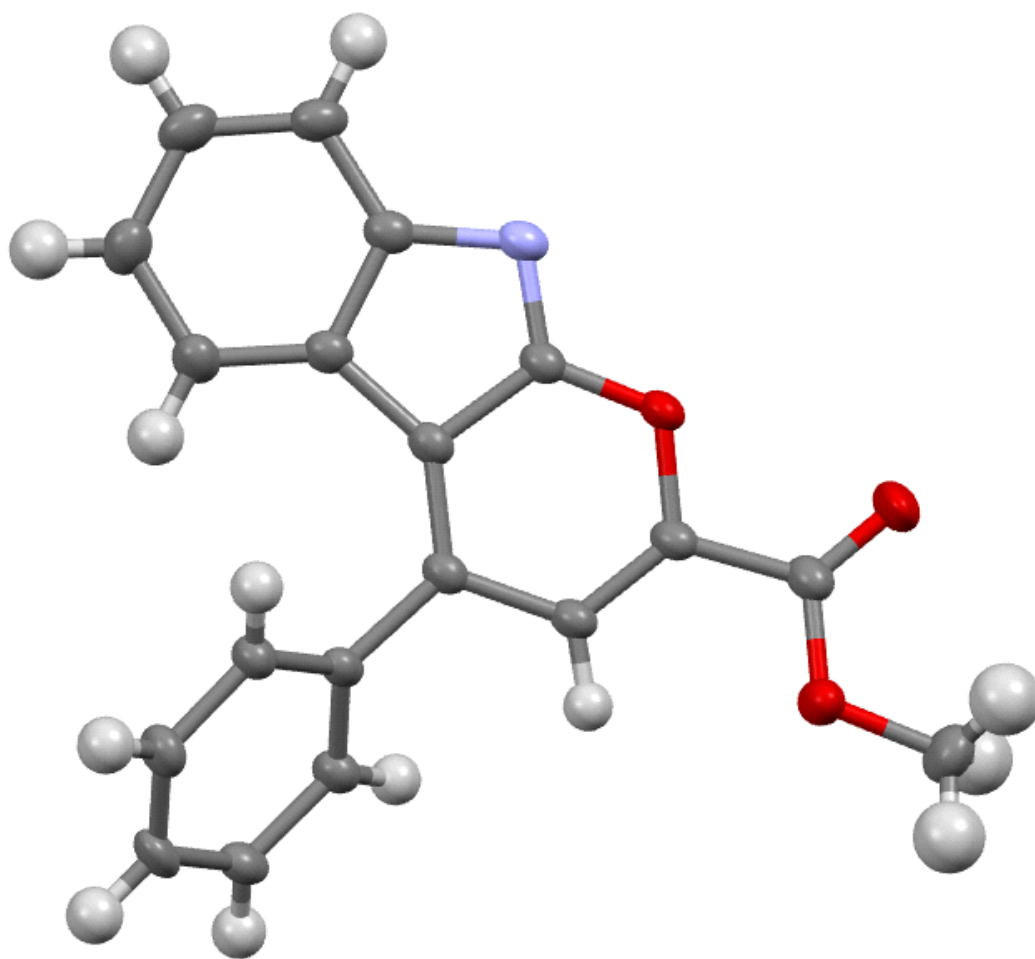

**Figure S7.** X-ray Structure of Compound **4aa** (CCDC 2040081)

## IX. NMR Spectrum

4a1:  $^1\text{H}$  NMR (500 MHz,  $\text{CDCl}_3$ )

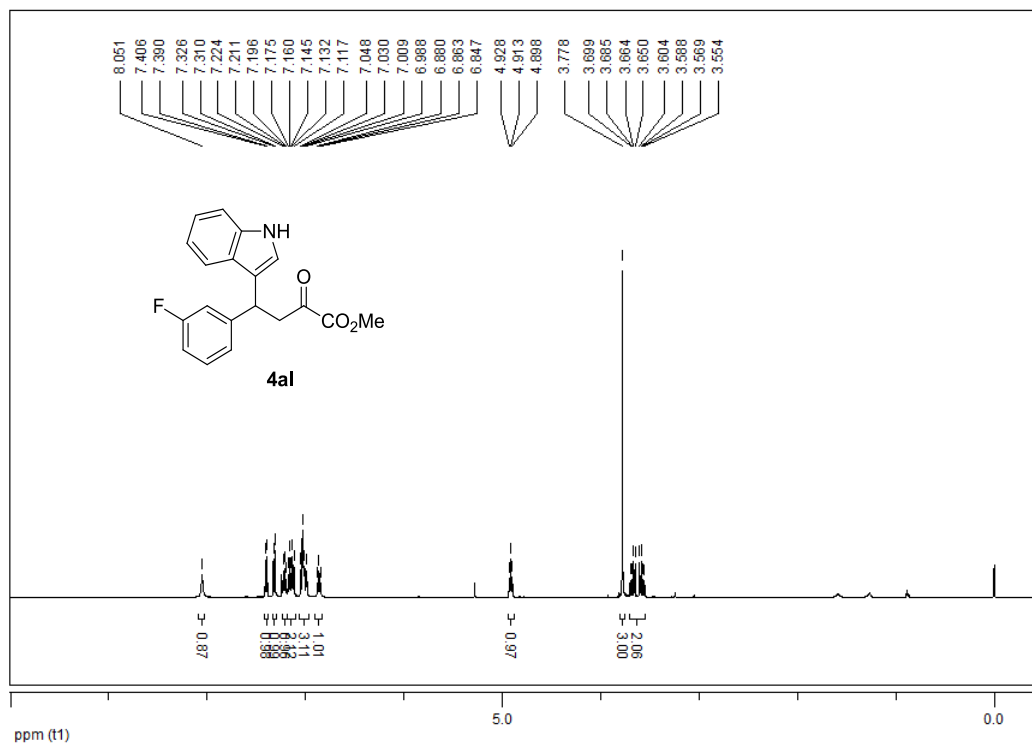

4a1:  $^{13}\text{C}$  NMR (125 MHz,  $\text{CDCl}_3$ )

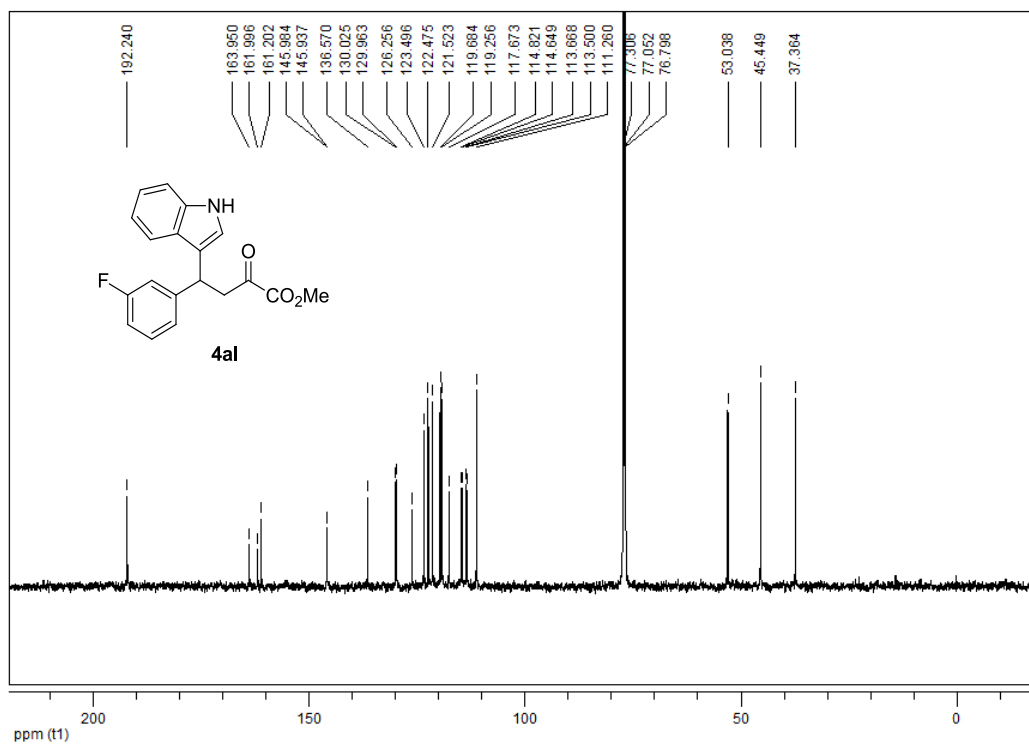

**4ao: <sup>1</sup>H NMR (500 MHz, CDCl<sub>3</sub>)**

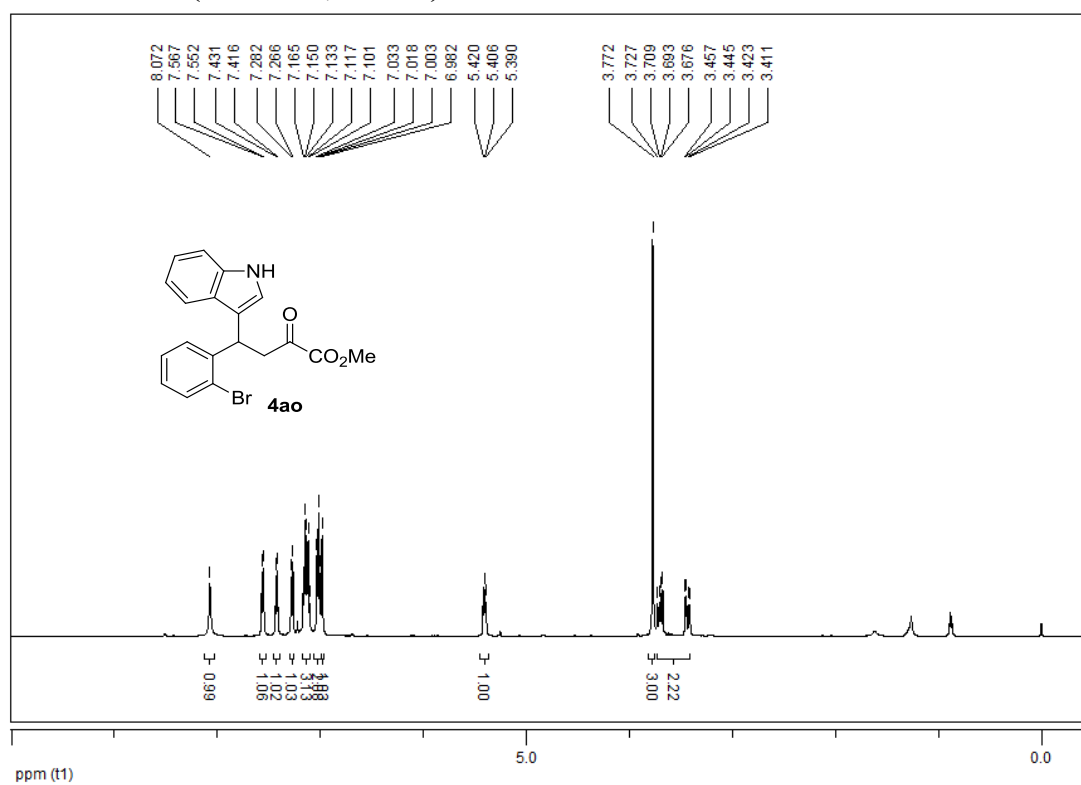

**4ao: <sup>13</sup>C NMR (125 MHz, CDCl<sub>3</sub>)**

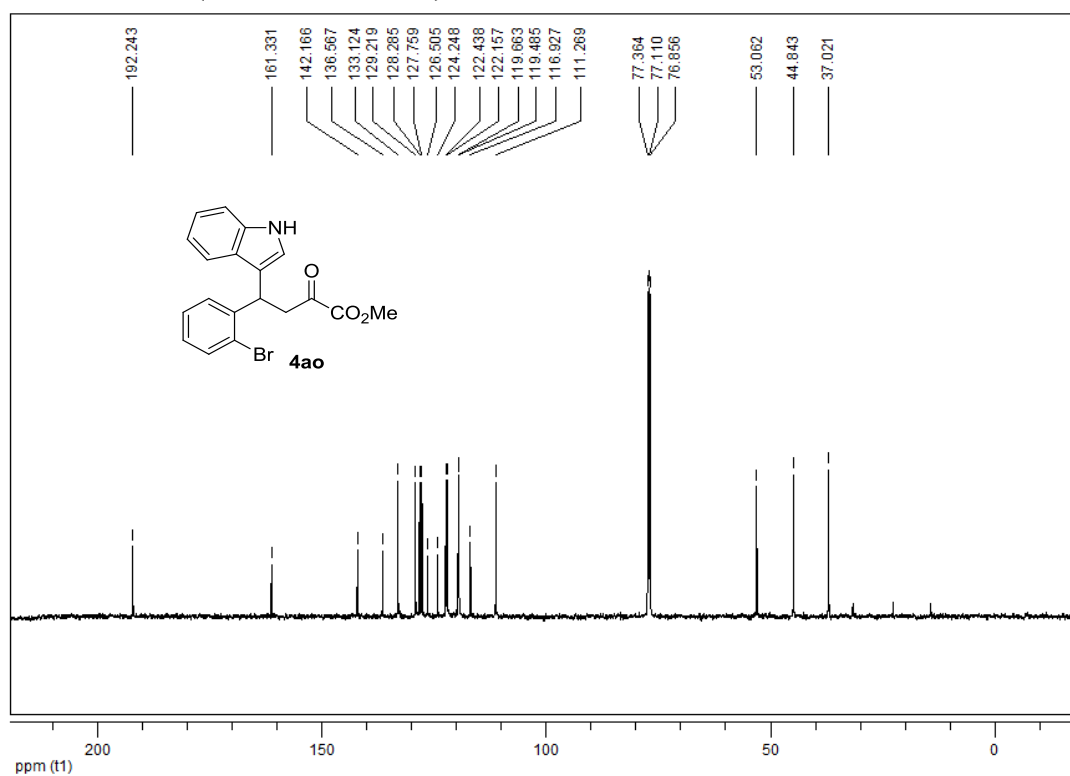

**4ar:  $^1\text{H}$  NMR (500 MHz,  $\text{CDCl}_3$ )**

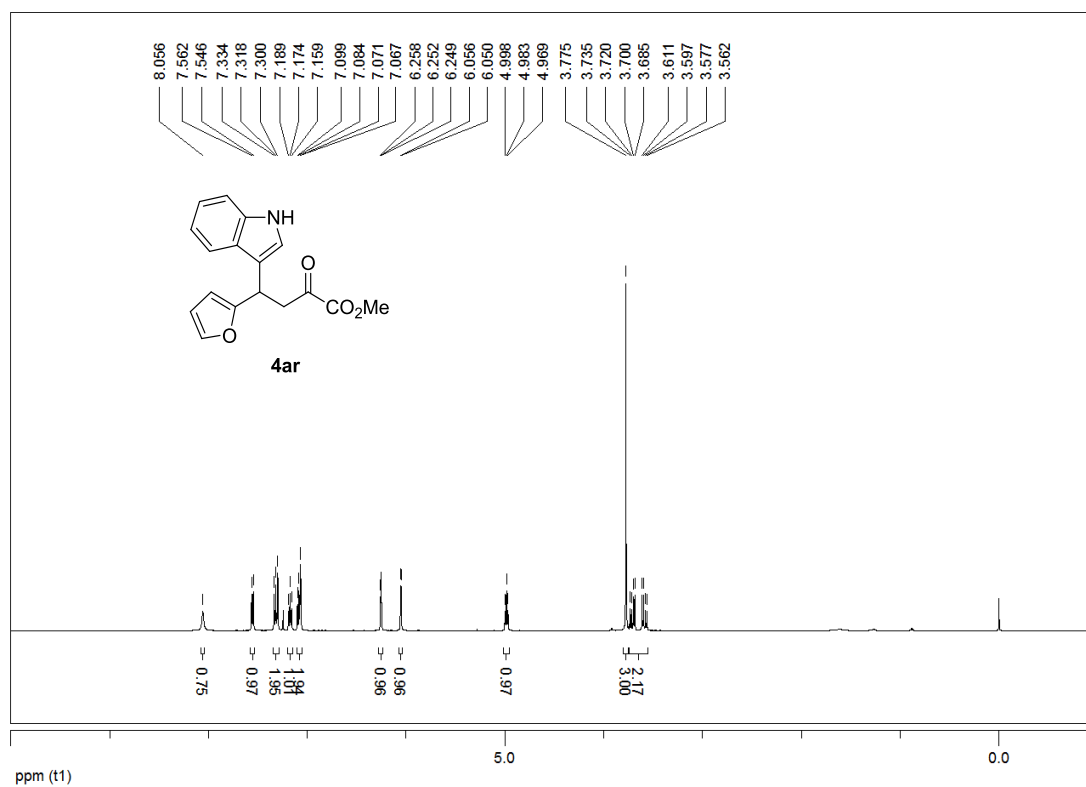

**4ar:  $^{13}\text{C}$  NMR (125 MHz,  $\text{CDCl}_3$ )**

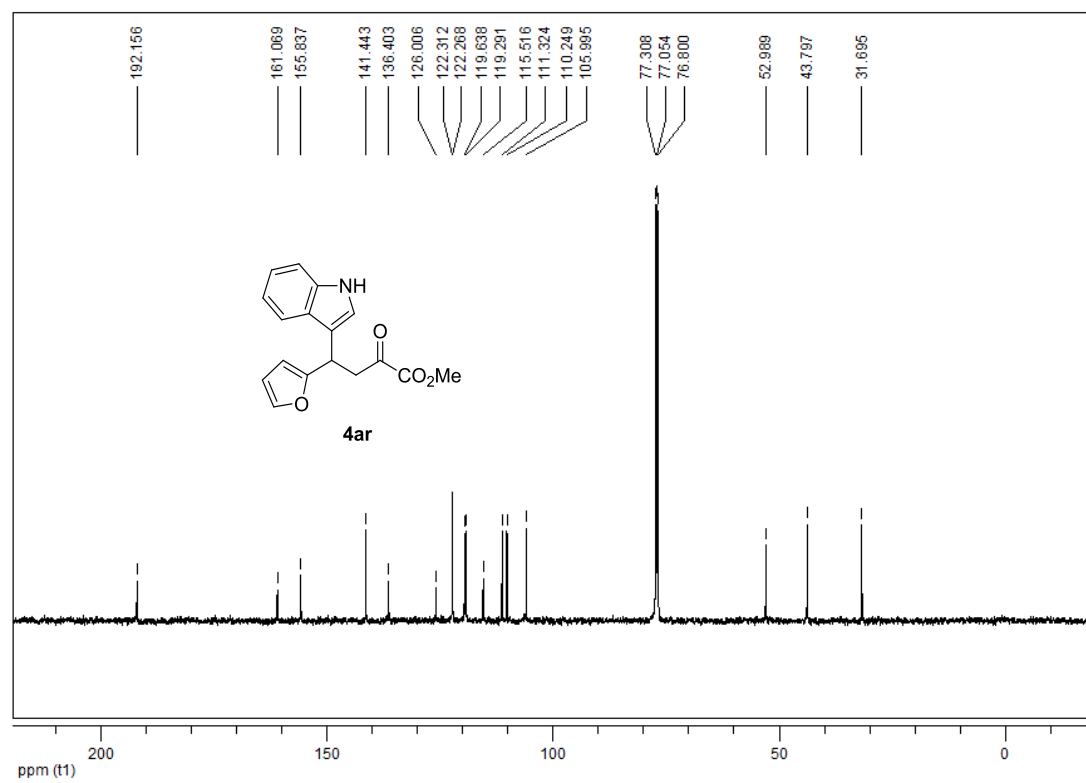

**1ha:  $^1\text{H}$  NMR (500 MHz,  $\text{CDCl}_3$ )**

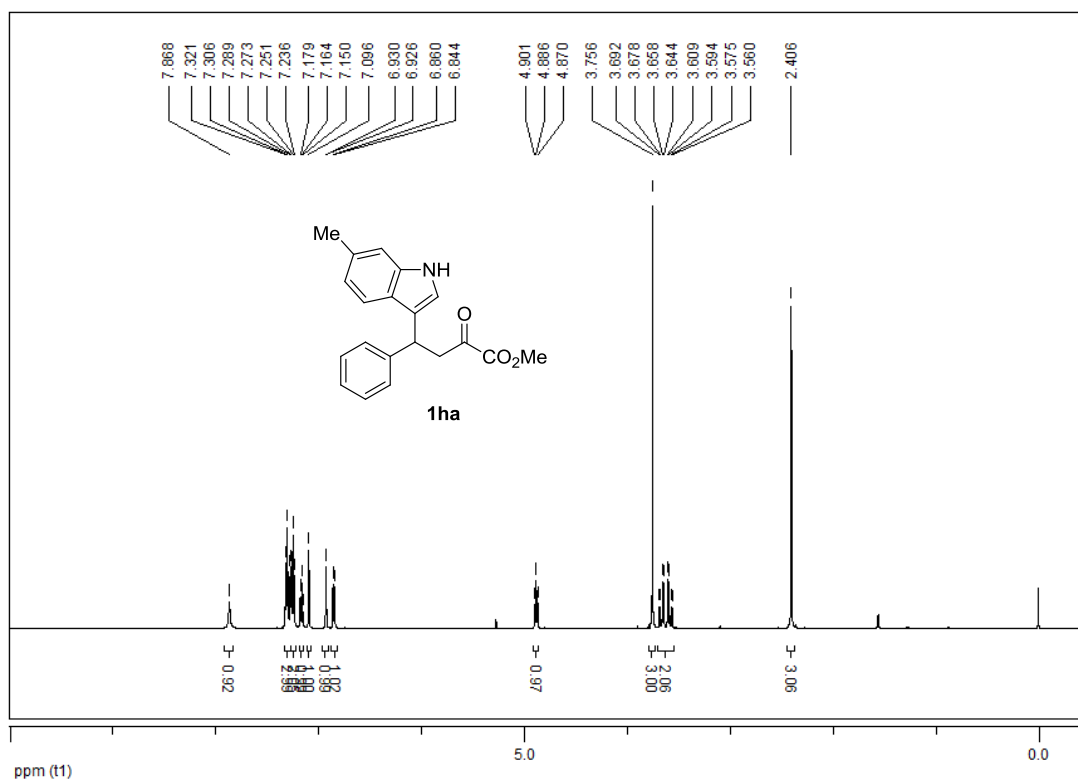

**1ha:  $^{13}\text{C}$  NMR (125 MHz,  $\text{CDCl}_3$ )**

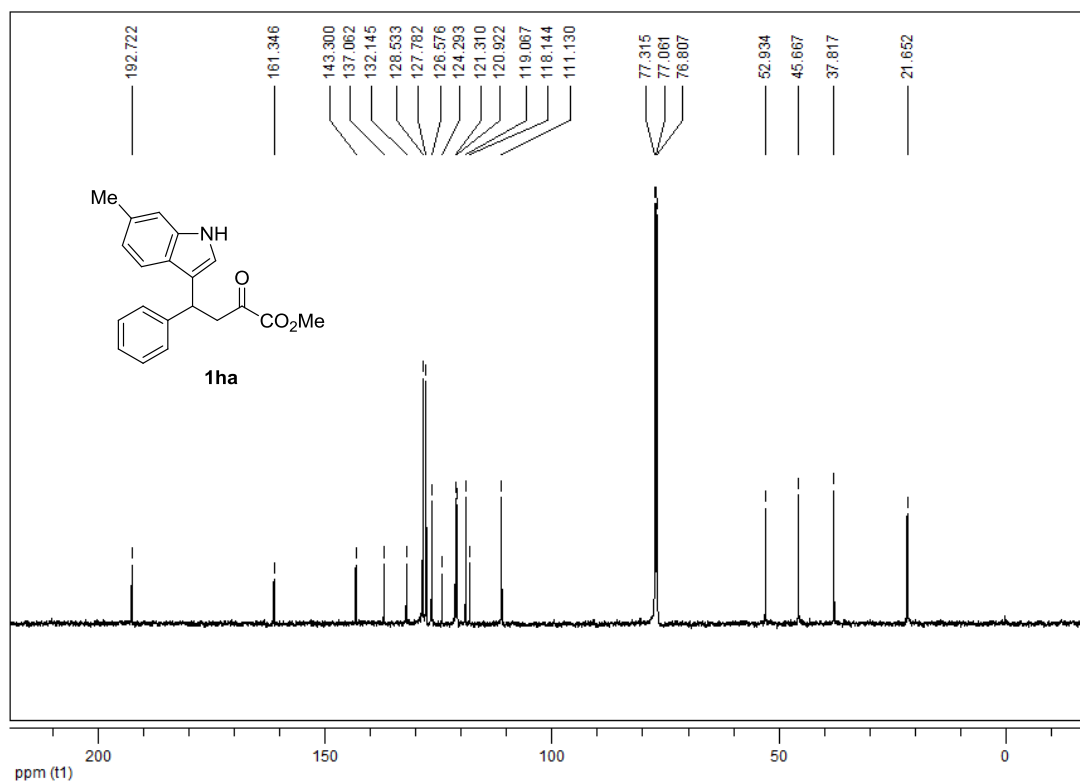



**1ja: <sup>1</sup>H NMR (500 MHz, CDCl<sub>3</sub>)**

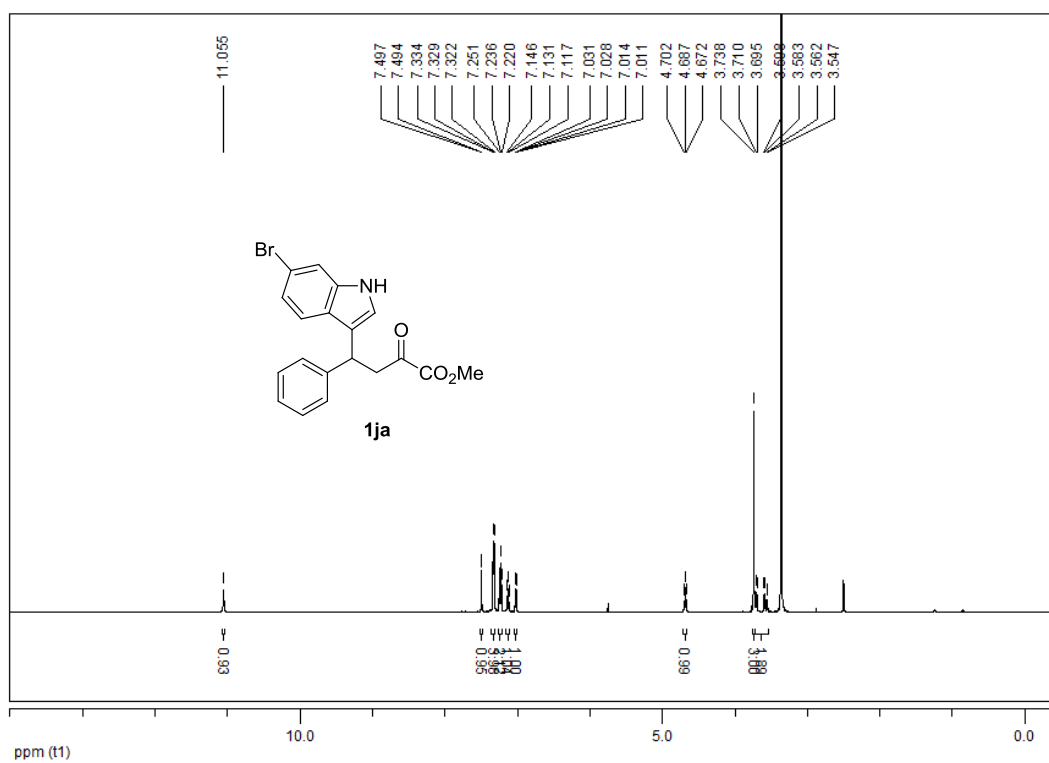

**1ja: <sup>13</sup>C NMR (125 MHz, CDCl<sub>3</sub>)**

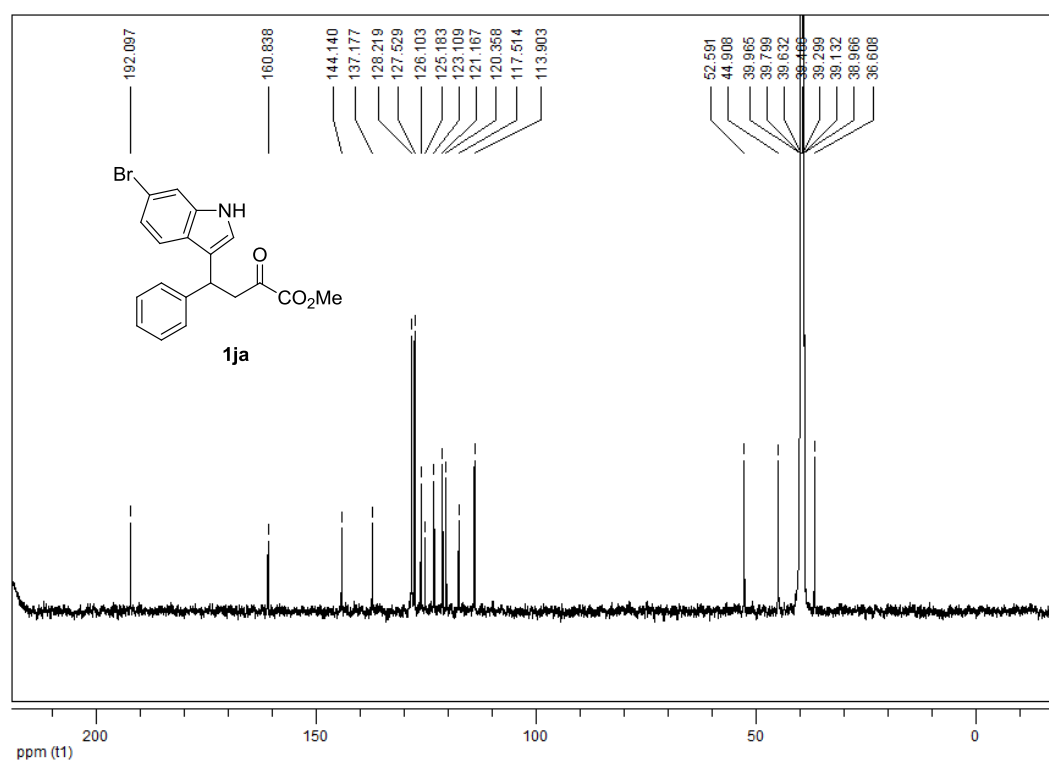

***cis-2aa*:  $^1\text{H}$  NMR (500 MHz,  $\text{CDCl}_3$ )**

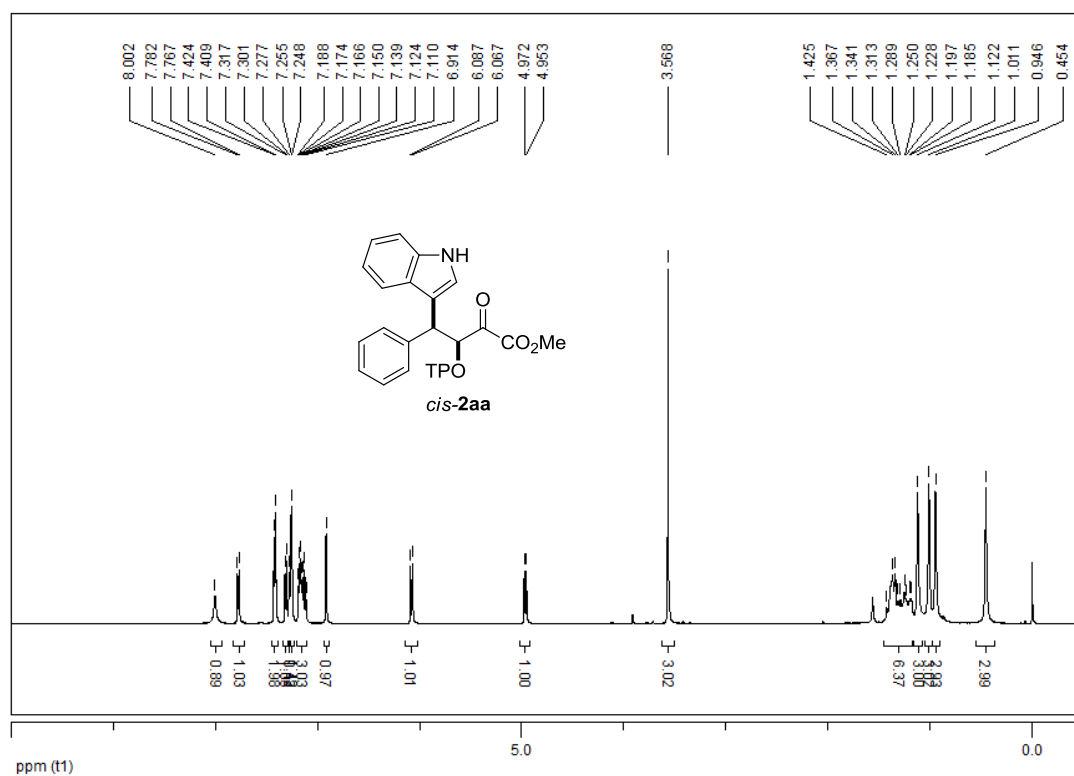

***cis-2aa*:  $^{13}\text{C}$  NMR (125 MHz,  $\text{CDCl}_3$ )**

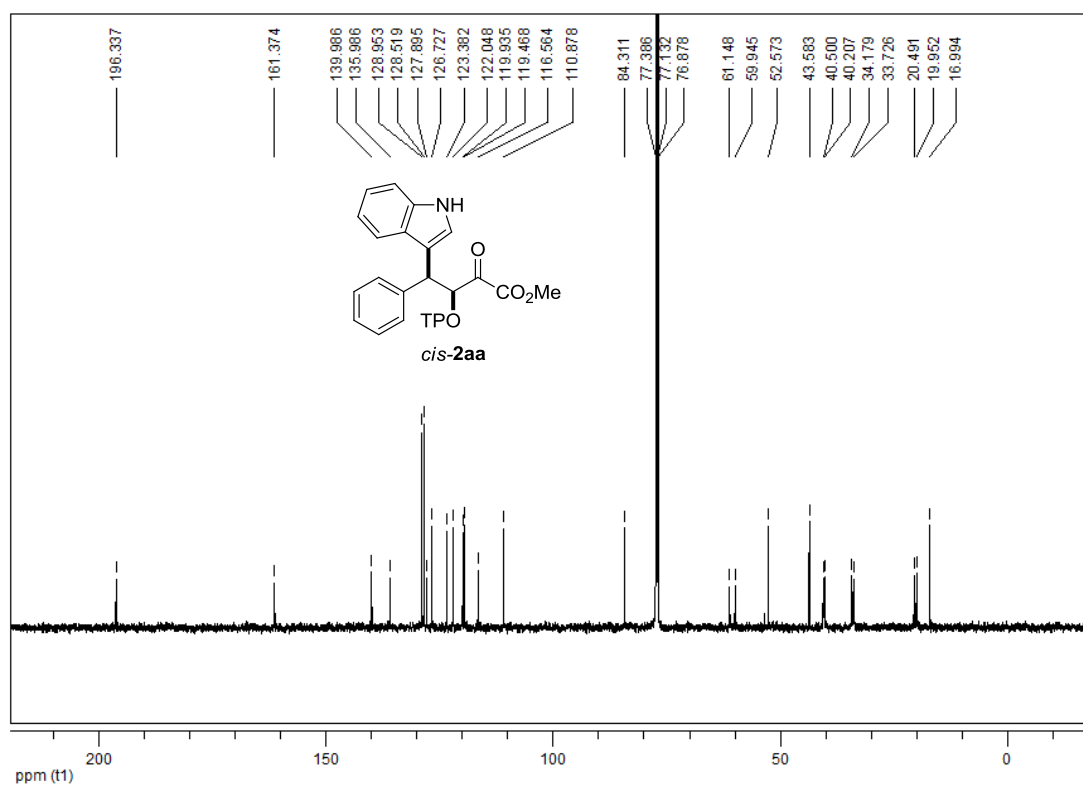







**4ab: <sup>1</sup>H NMR (500 MHz, CDCl<sub>3</sub>)**

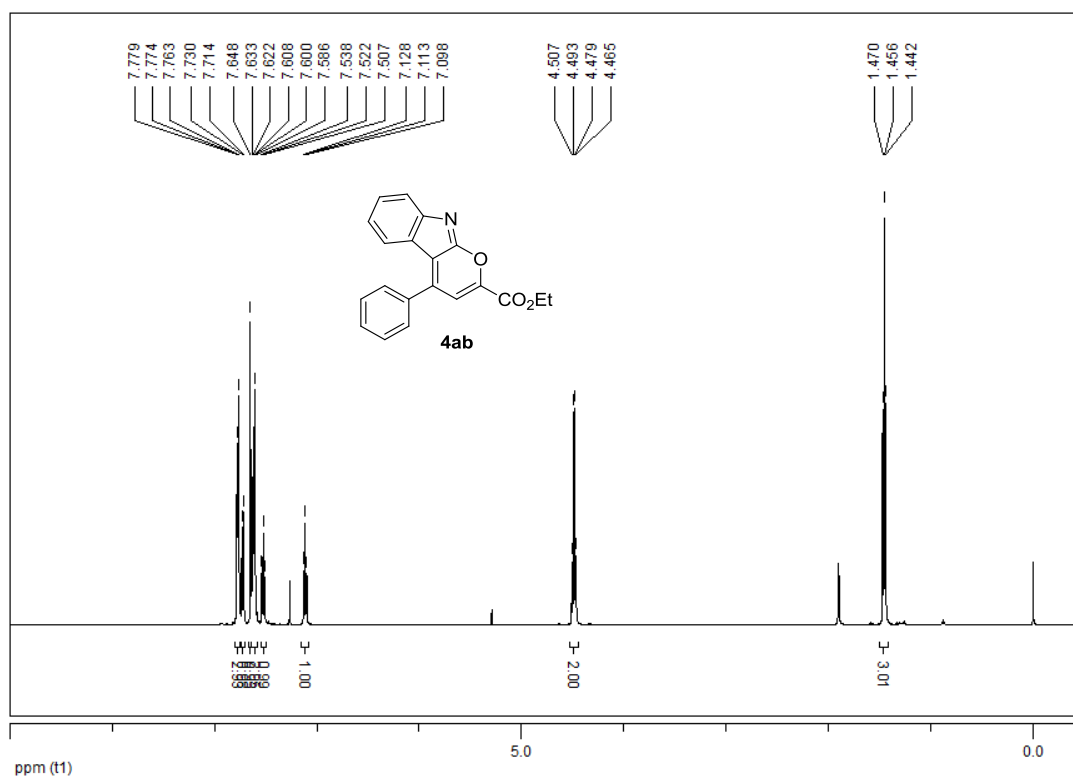

**4ab: <sup>13</sup>C NMR (125 MHz, CDCl<sub>3</sub>)**

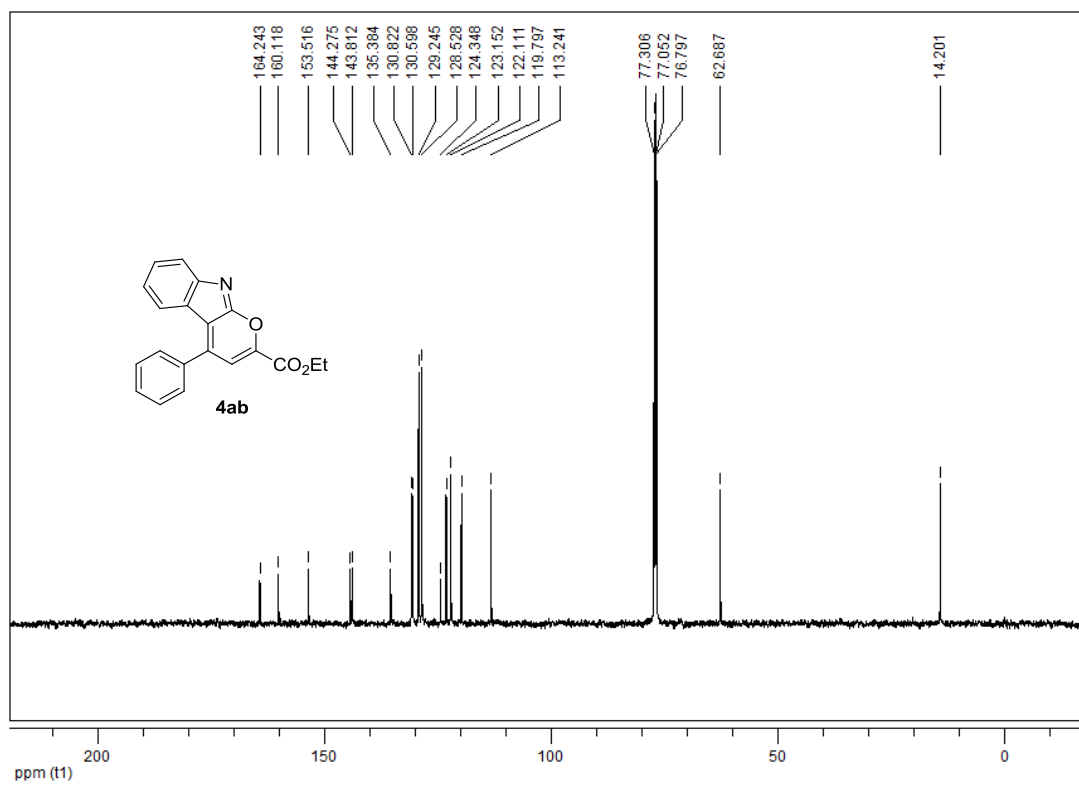



**4ad: <sup>1</sup>H NMR (500 MHz, CDCl<sub>3</sub>)**

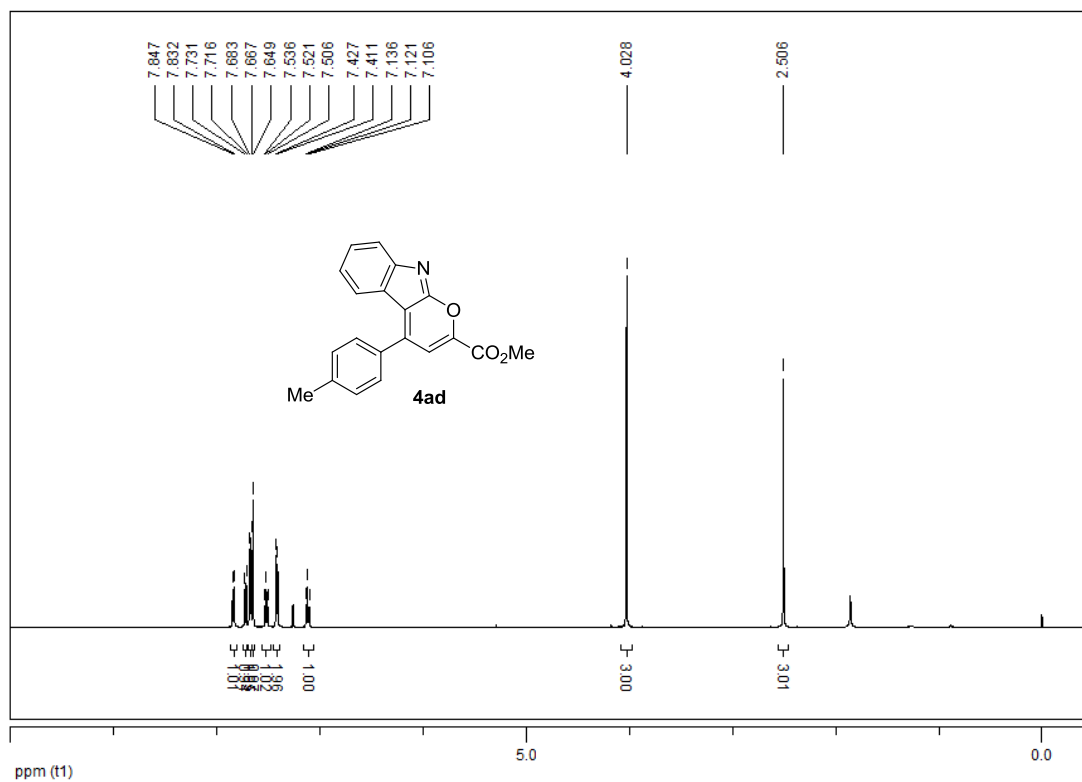

**4ad: <sup>13</sup>C NMR (125 MHz, CDCl<sub>3</sub>)**

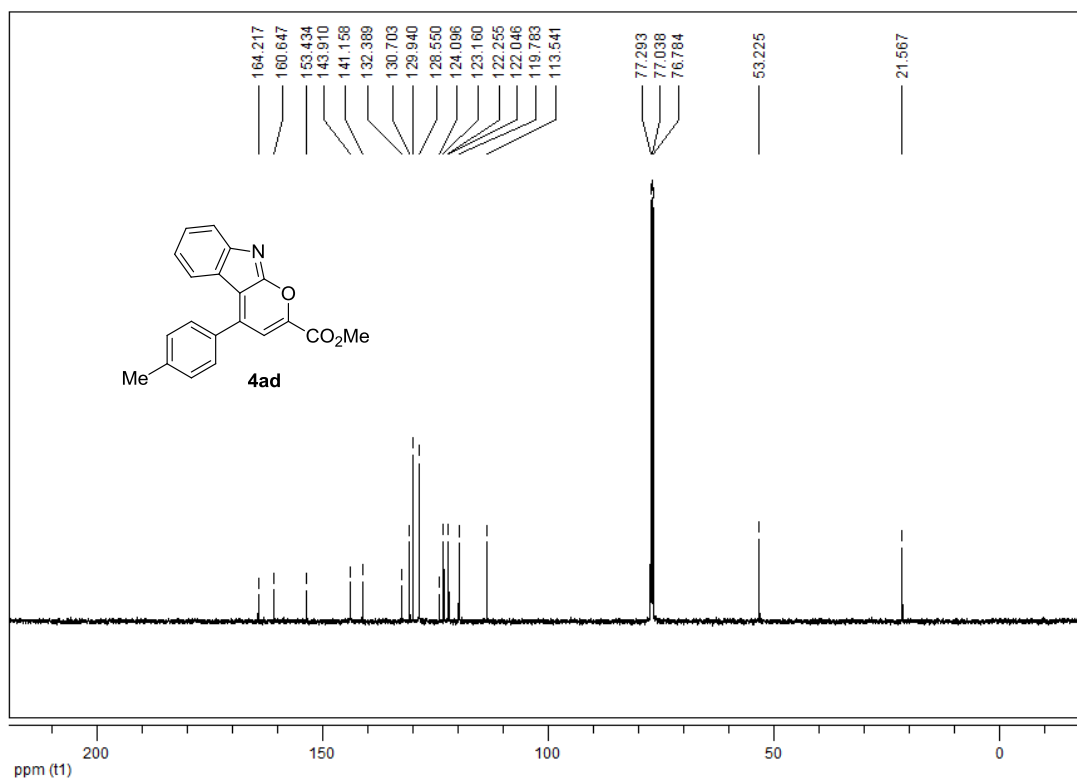



**4ae: <sup>1</sup>H NMR (500 MHz, CDCl<sub>3</sub>)**

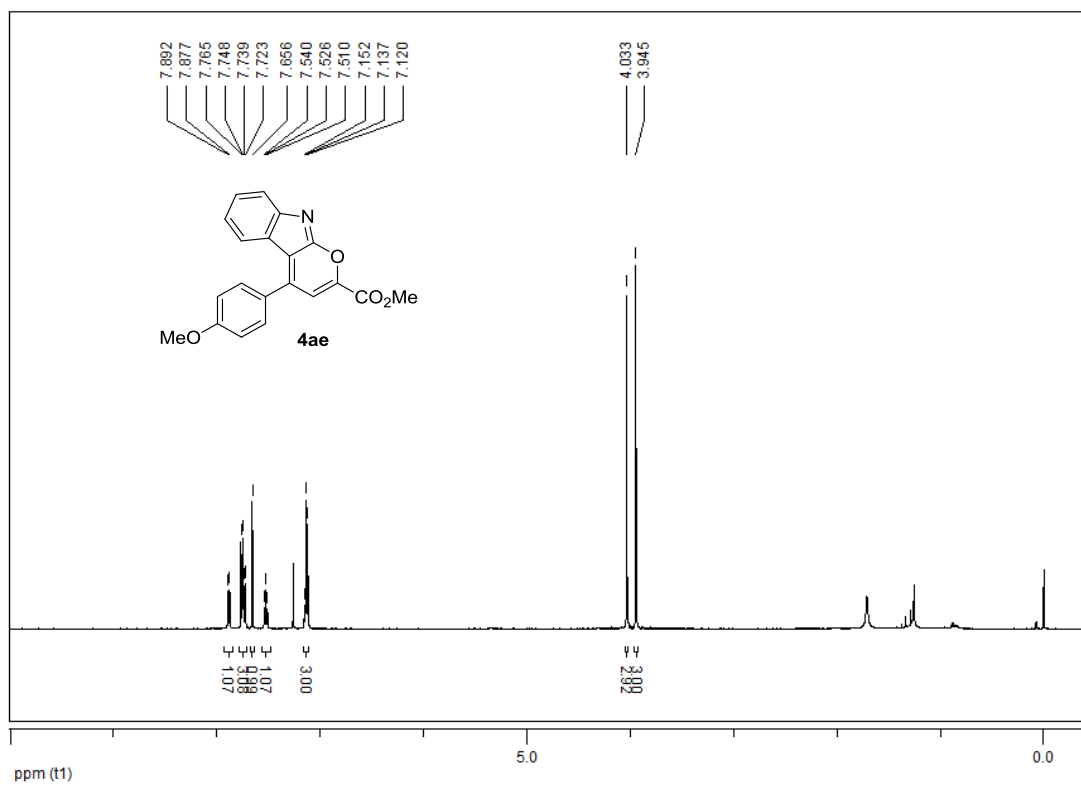

**4ae: <sup>13</sup>C NMR (125 MHz, CDCl<sub>3</sub>)**

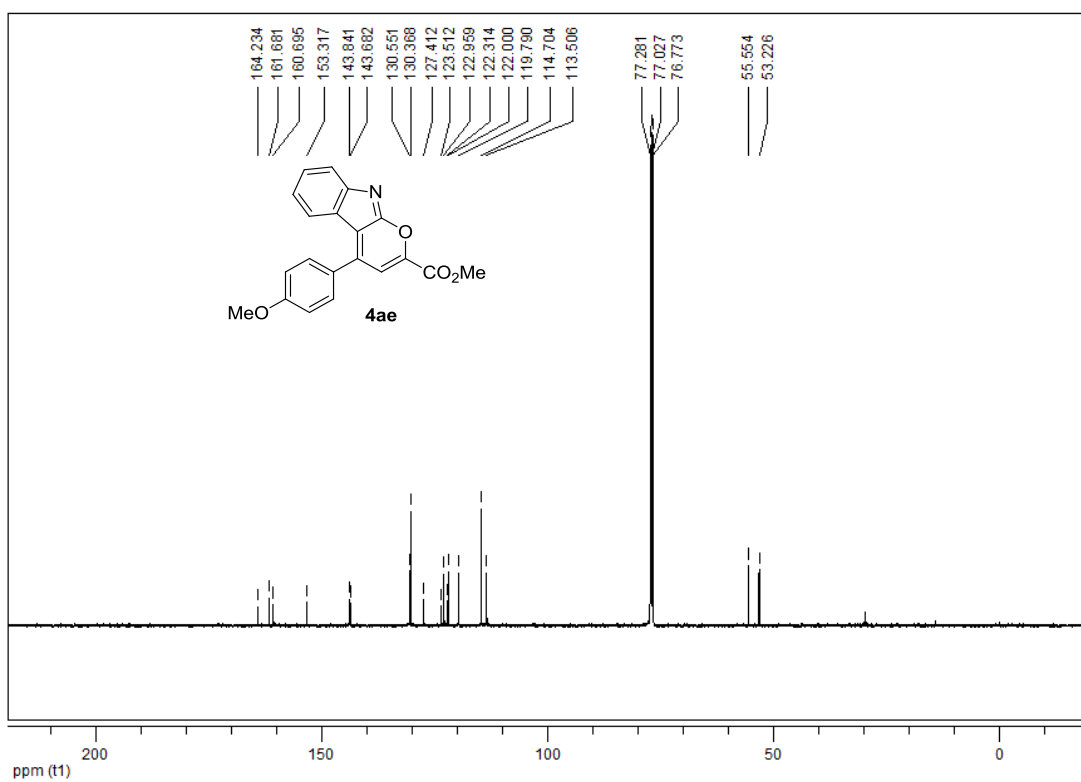

**4af:  $^1\text{H}$  NMR (500 MHz,  $\text{CDCl}_3$ )**

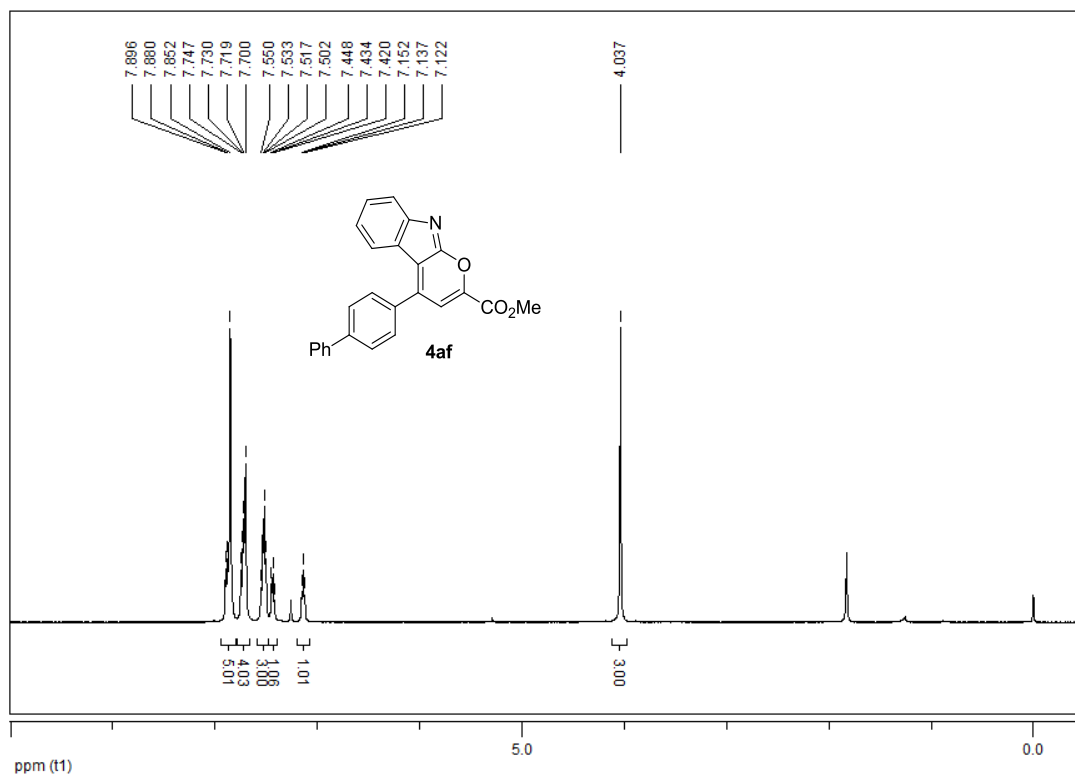

**4af:  $^{13}\text{C}$  NMR (125 MHz,  $\text{CDCl}_3$ )**

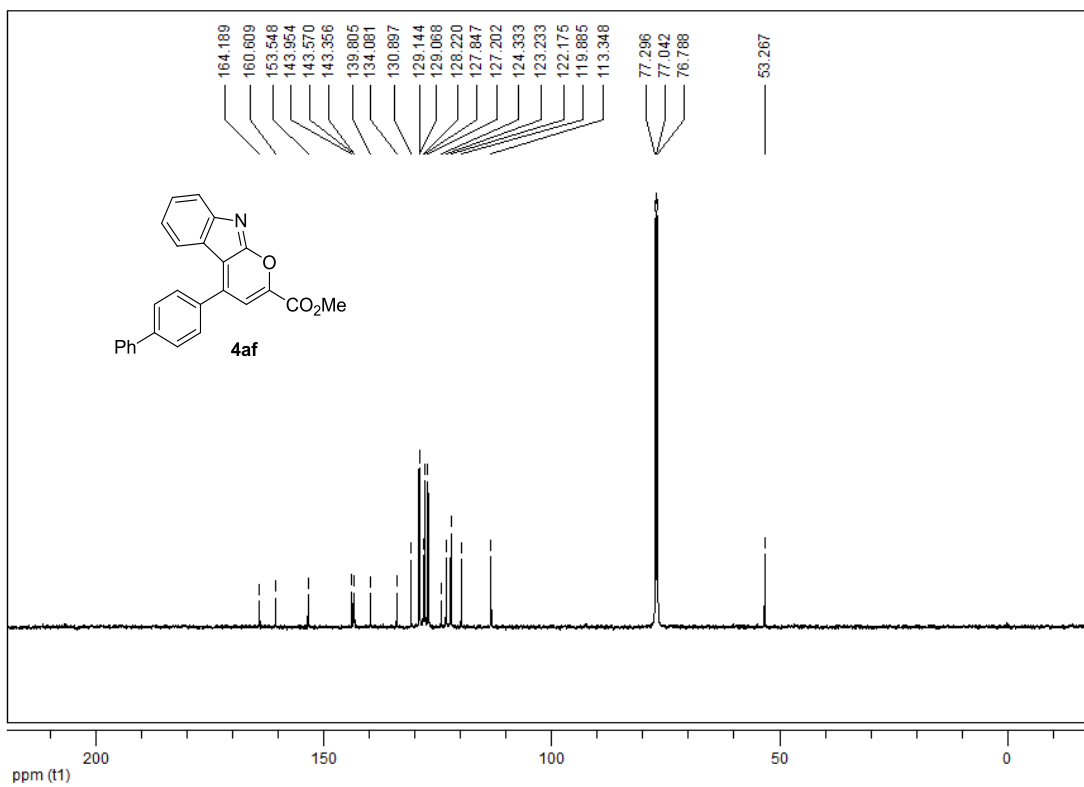



**4ah: <sup>1</sup>H NMR (500 MHz, CDCl<sub>3</sub>)**

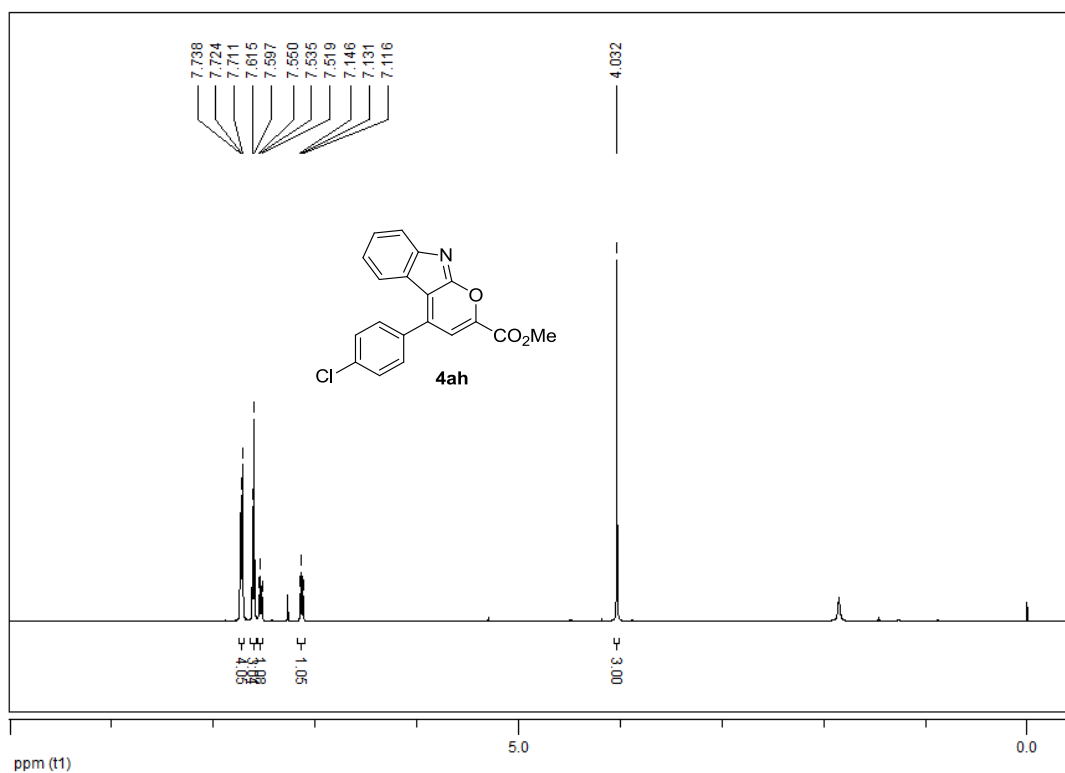

**4ah: <sup>13</sup>C NMR (125 MHz, CDCl<sub>3</sub>)**

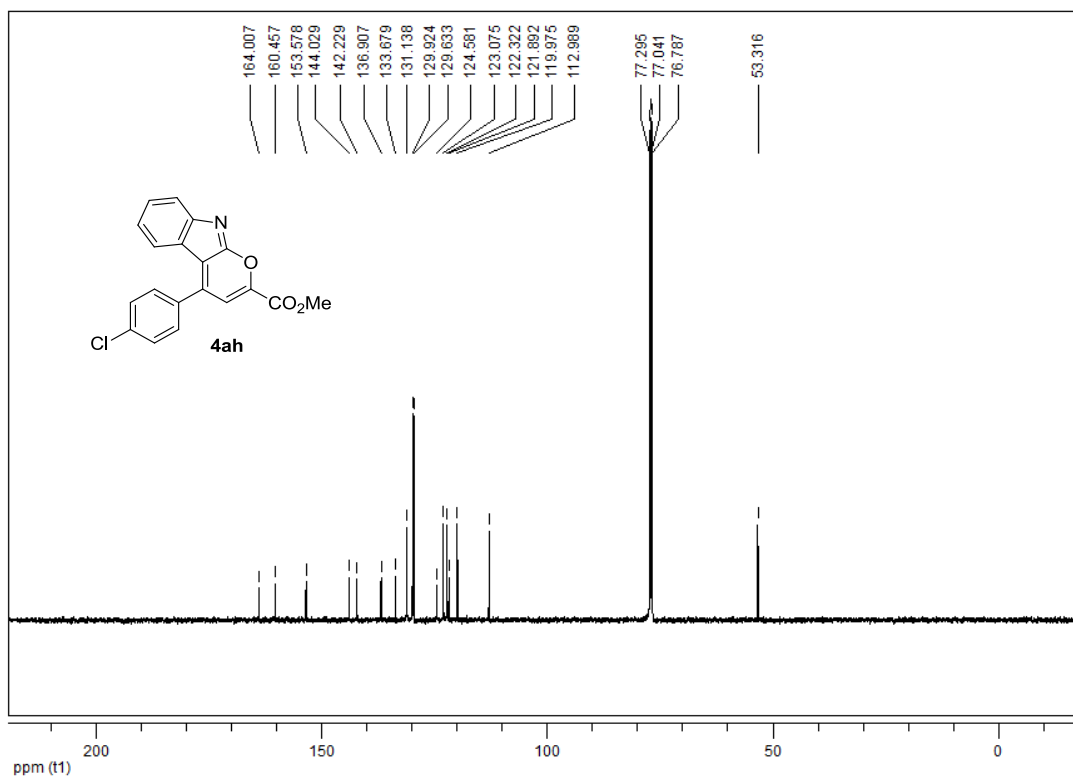



**4aj: <sup>1</sup>H NMR (500 MHz, CDCl<sub>3</sub>)**

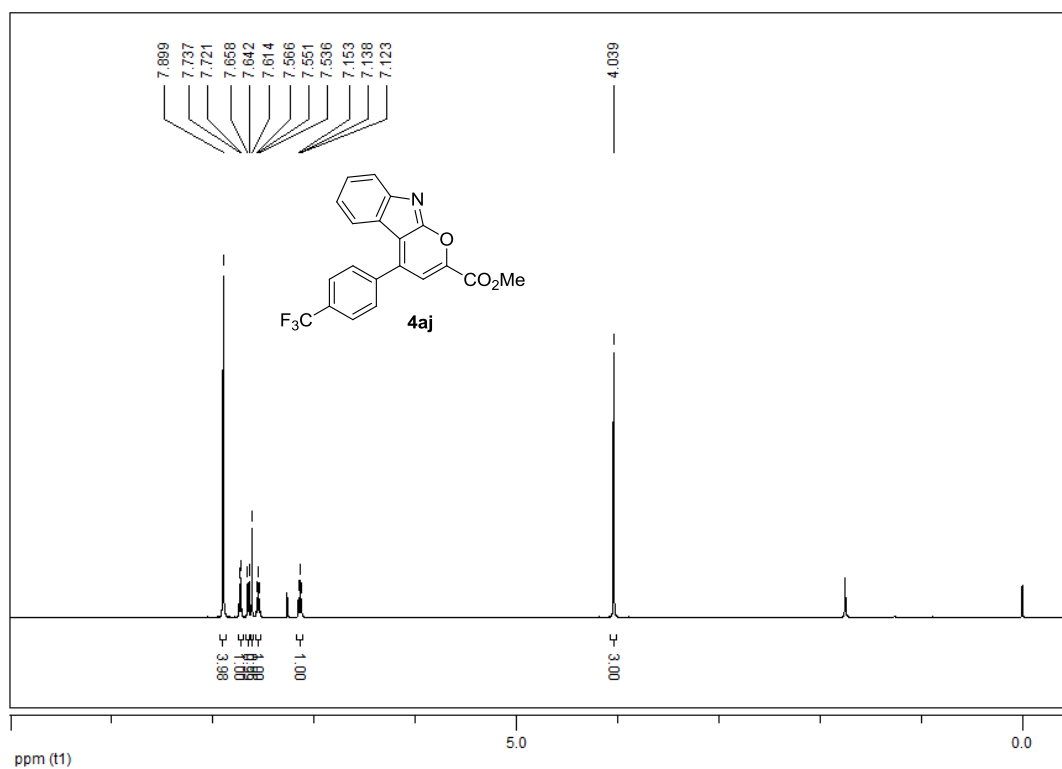

**4aj: <sup>13</sup>C NMR (125 MHz, CDCl<sub>3</sub>)**

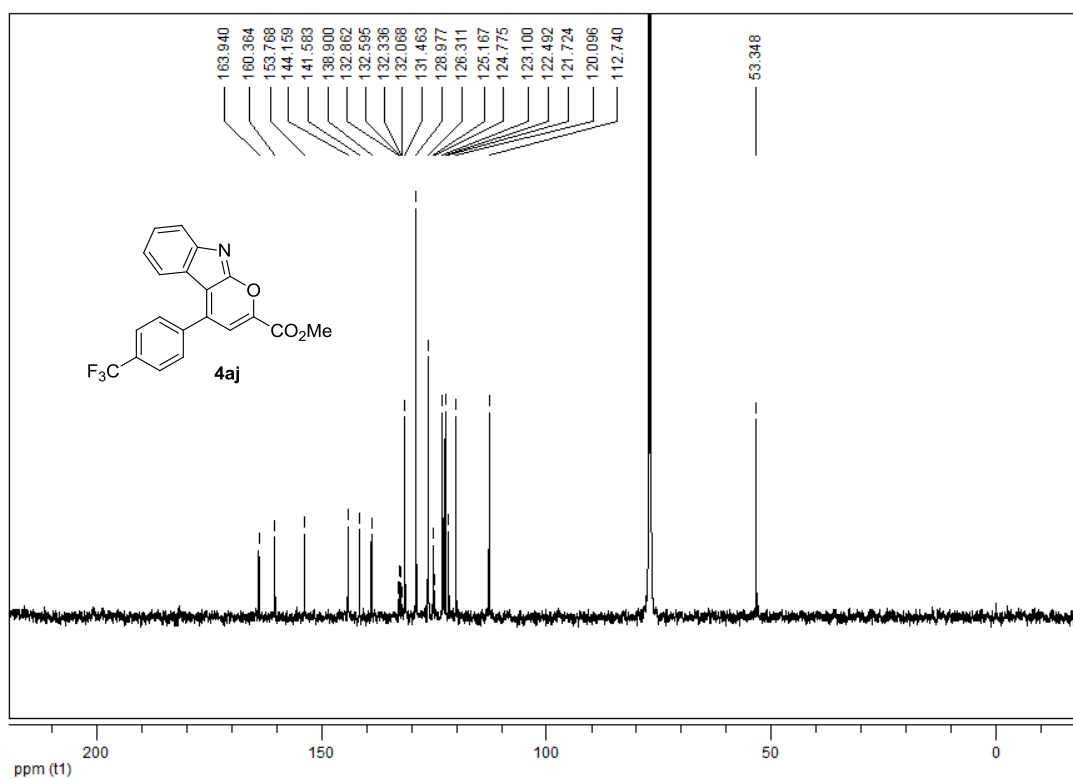



**4al: <sup>1</sup>H NMR (500 MHz, CDCl<sub>3</sub>)**

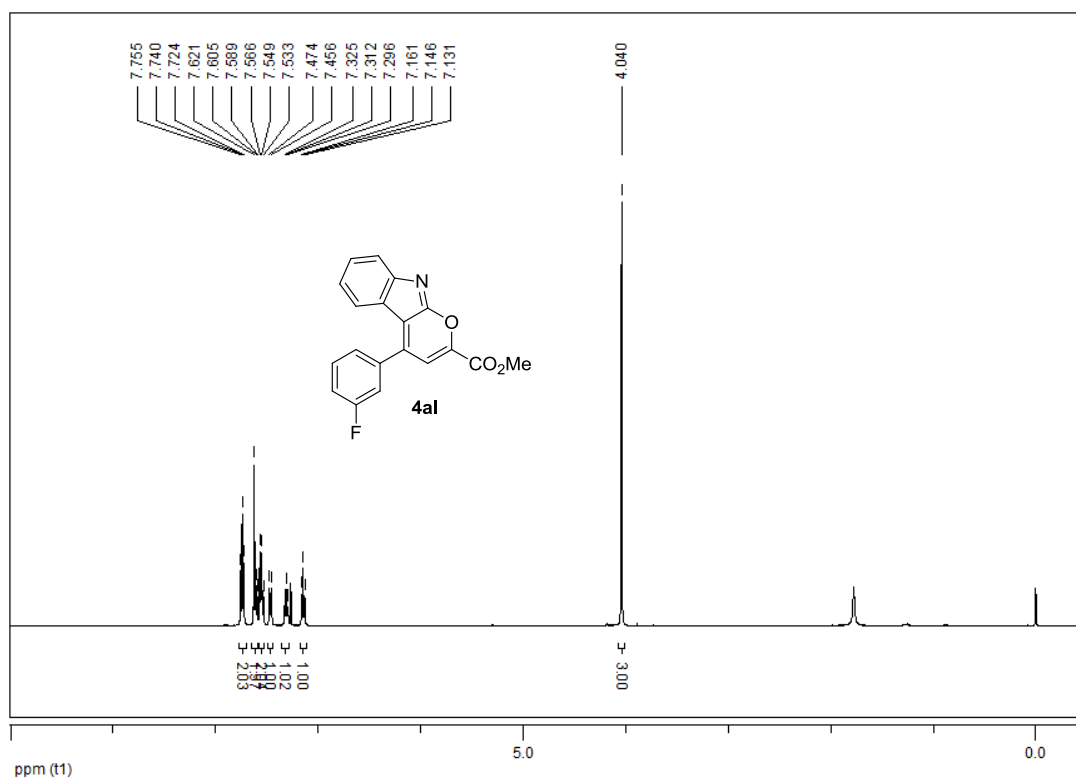

**4al: <sup>13</sup>C NMR (125 MHz, CDCl<sub>3</sub>)**

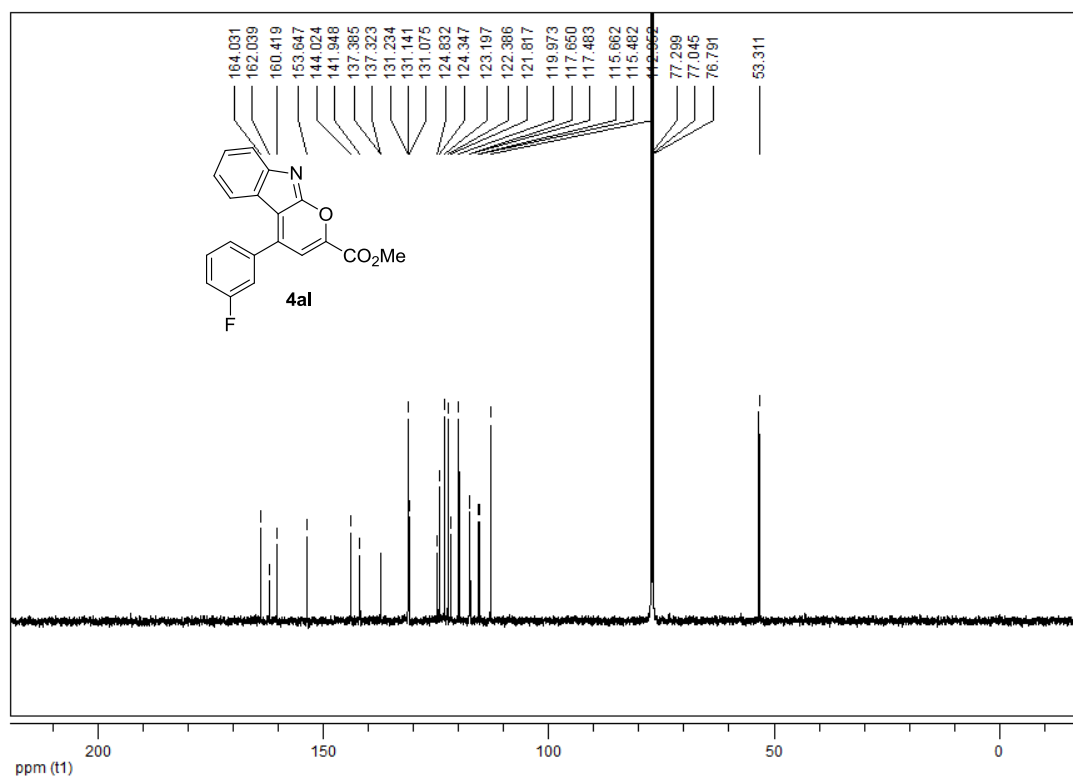



**4am:  $^1\text{H}$  NMR (500 MHz,  $\text{CDCl}_3$ )**

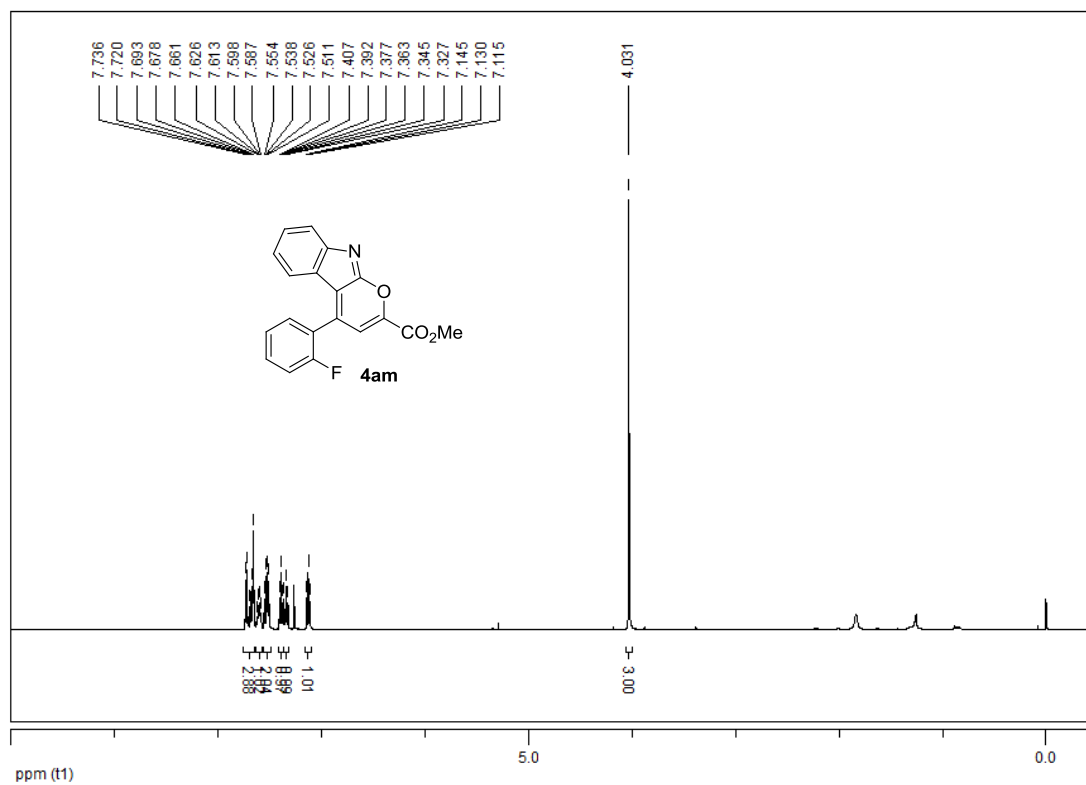

**4am:  $^{13}\text{C}$  NMR (125 MHz,  $\text{CDCl}_3$ )**

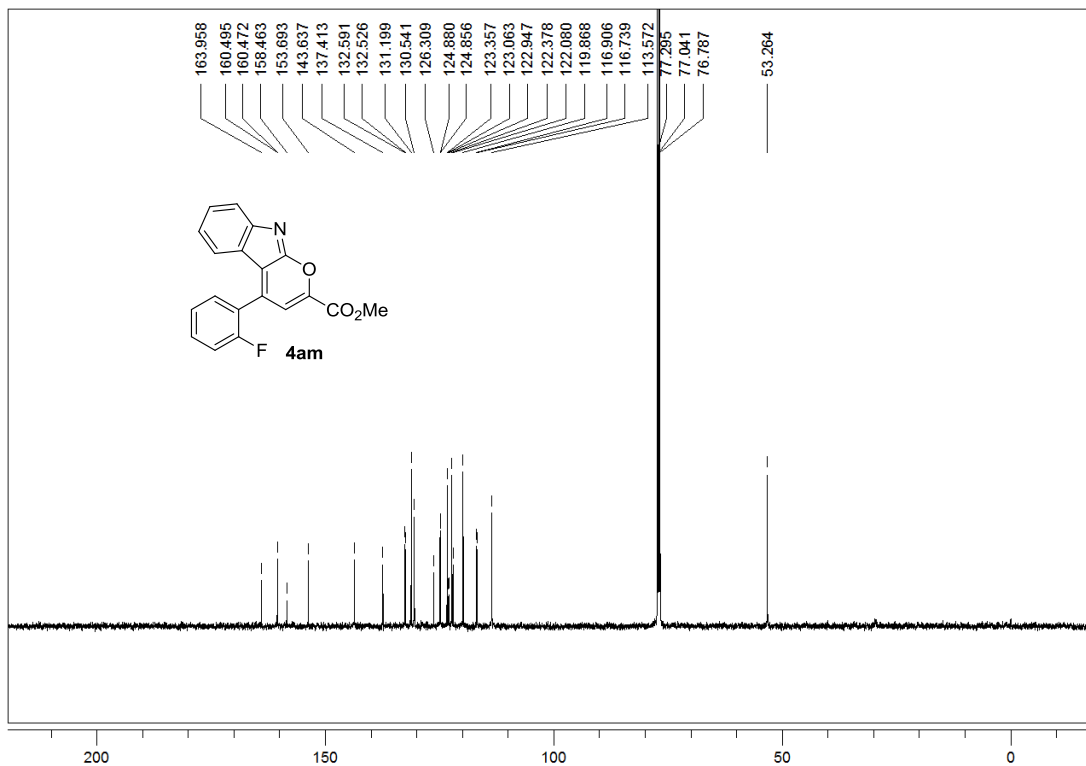

**4an: <sup>1</sup>H NMR (500 MHz, CDCl<sub>3</sub>)**

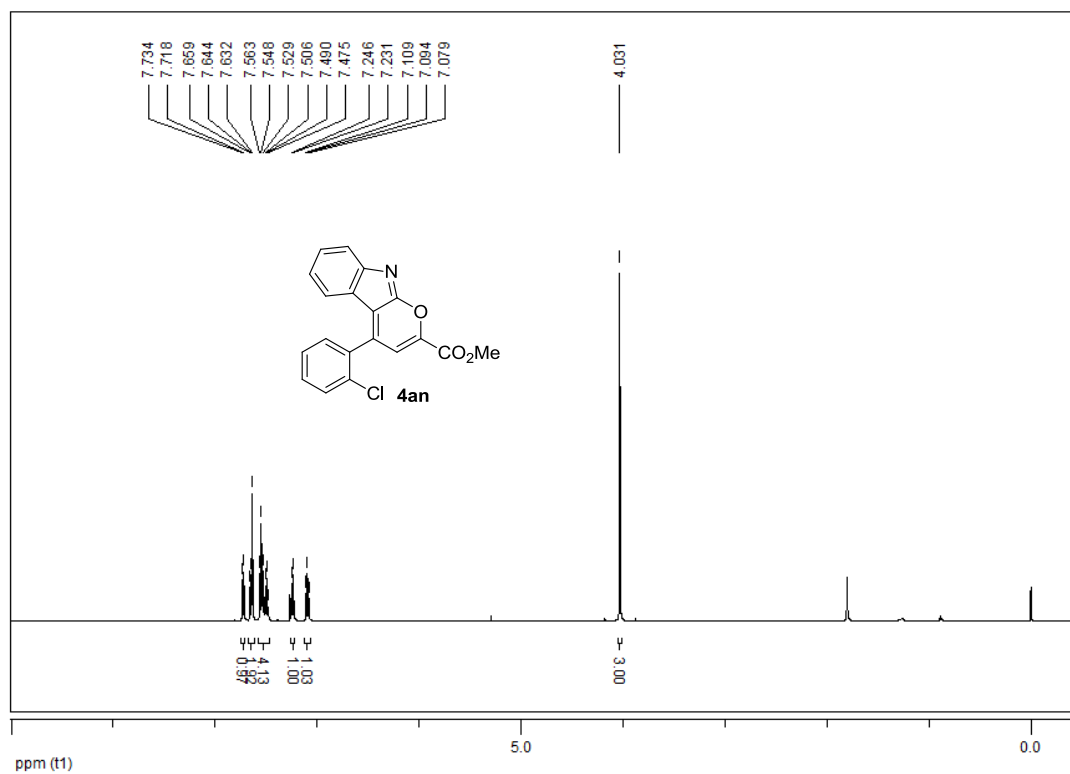

**4an: <sup>13</sup>C NMR (125 MHz, CDCl<sub>3</sub>)**

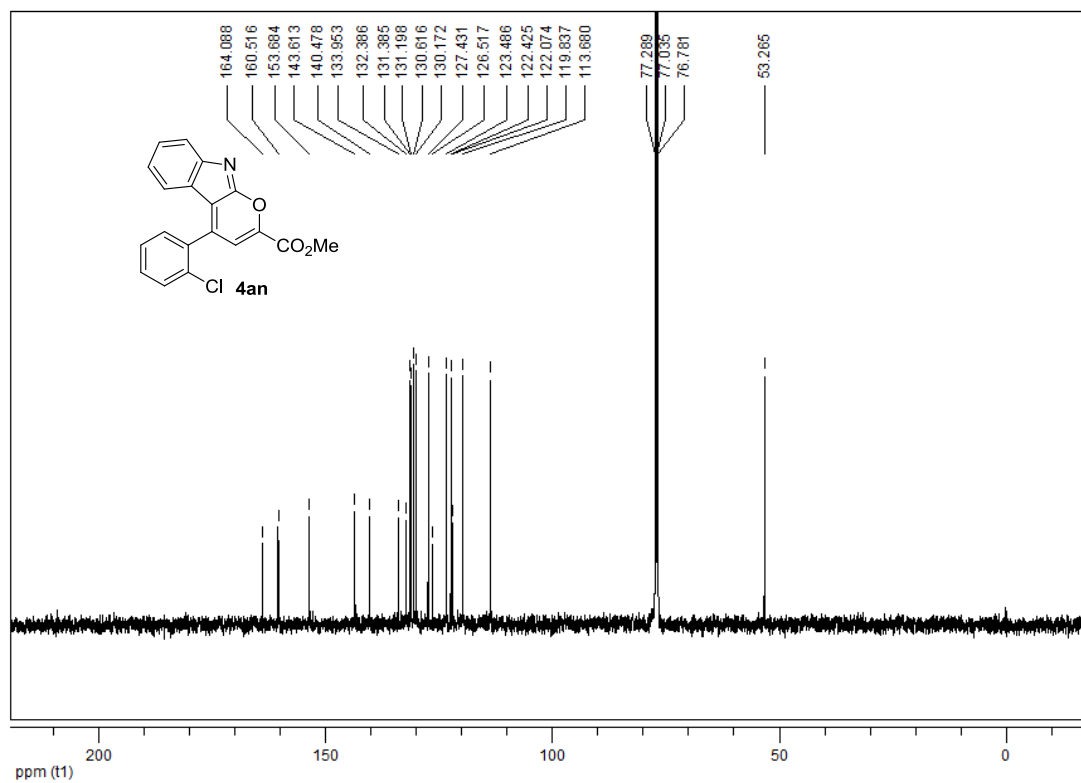









**4as: <sup>1</sup>H NMR (500 MHz, CDCl<sub>3</sub>)**

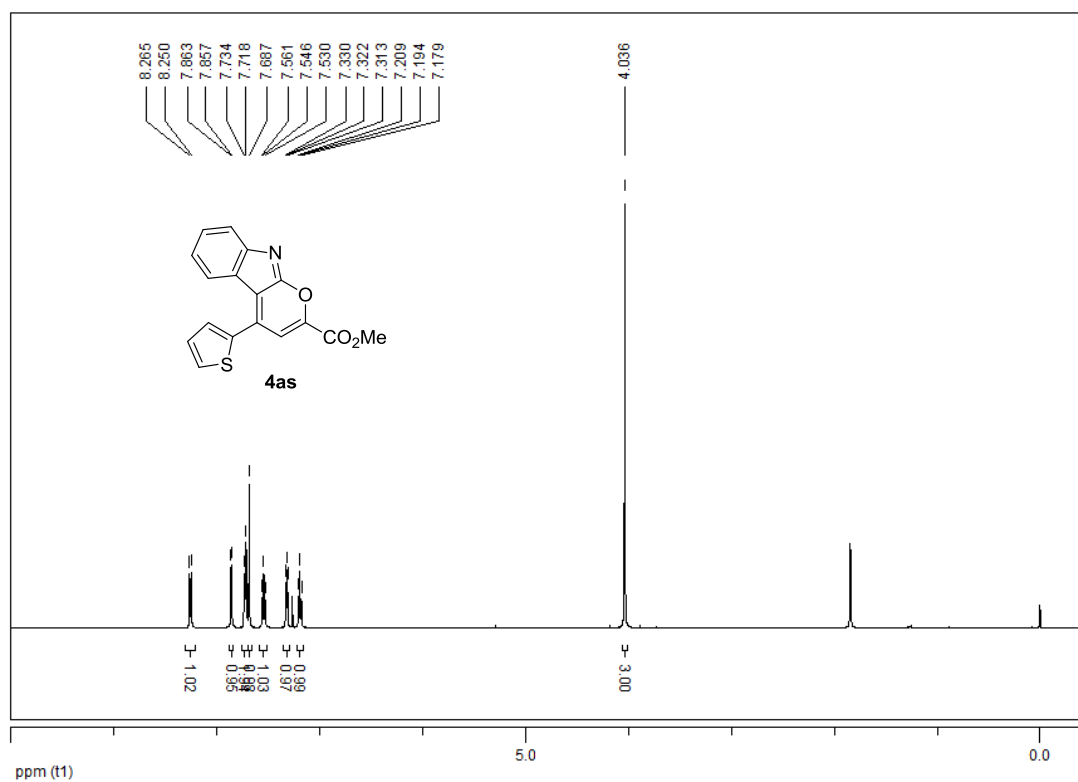

**4as: <sup>13</sup>C NMR (125 MHz, CDCl<sub>3</sub>)**

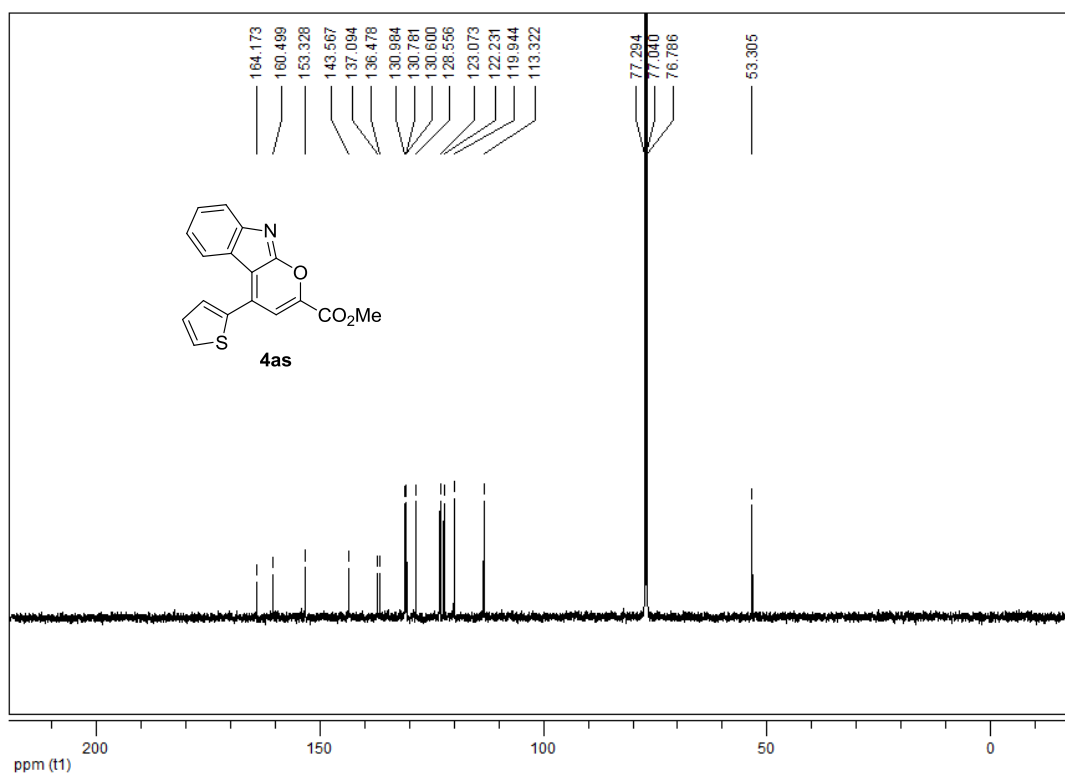

**3at: <sup>1</sup>H NMR (500 MHz, DMSO-d<sub>6</sub>)**

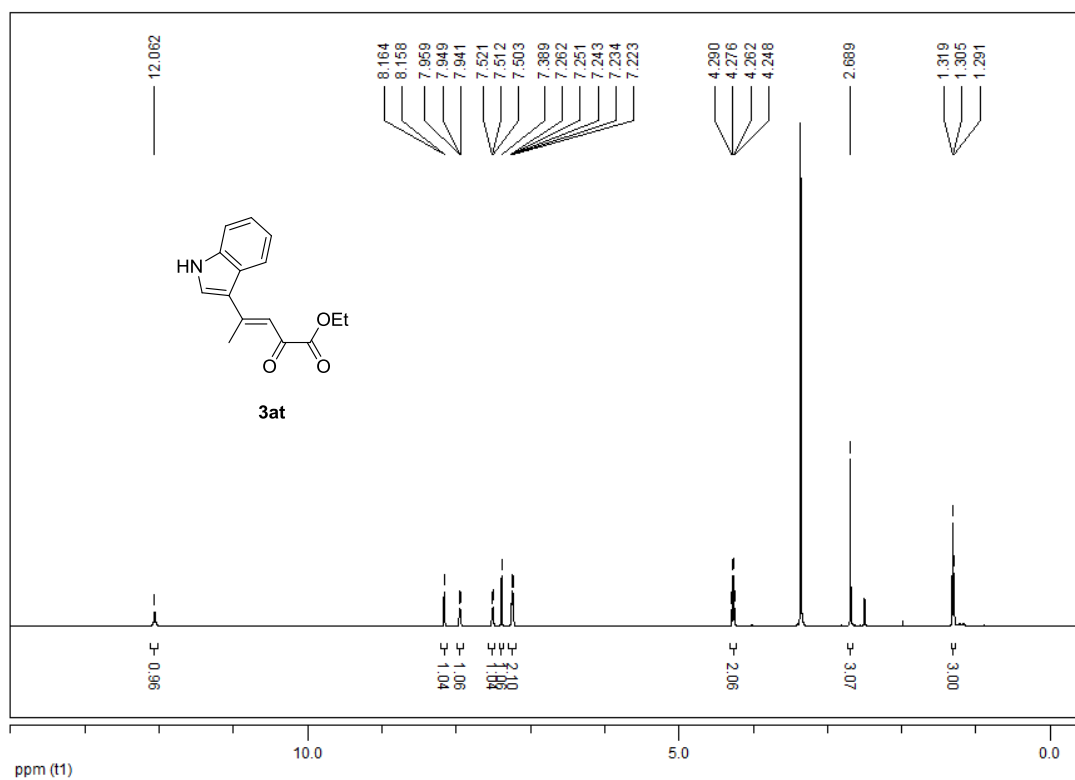

**3at: <sup>13</sup>C NMR (125 MHz, DMSO-d<sub>6</sub>)**

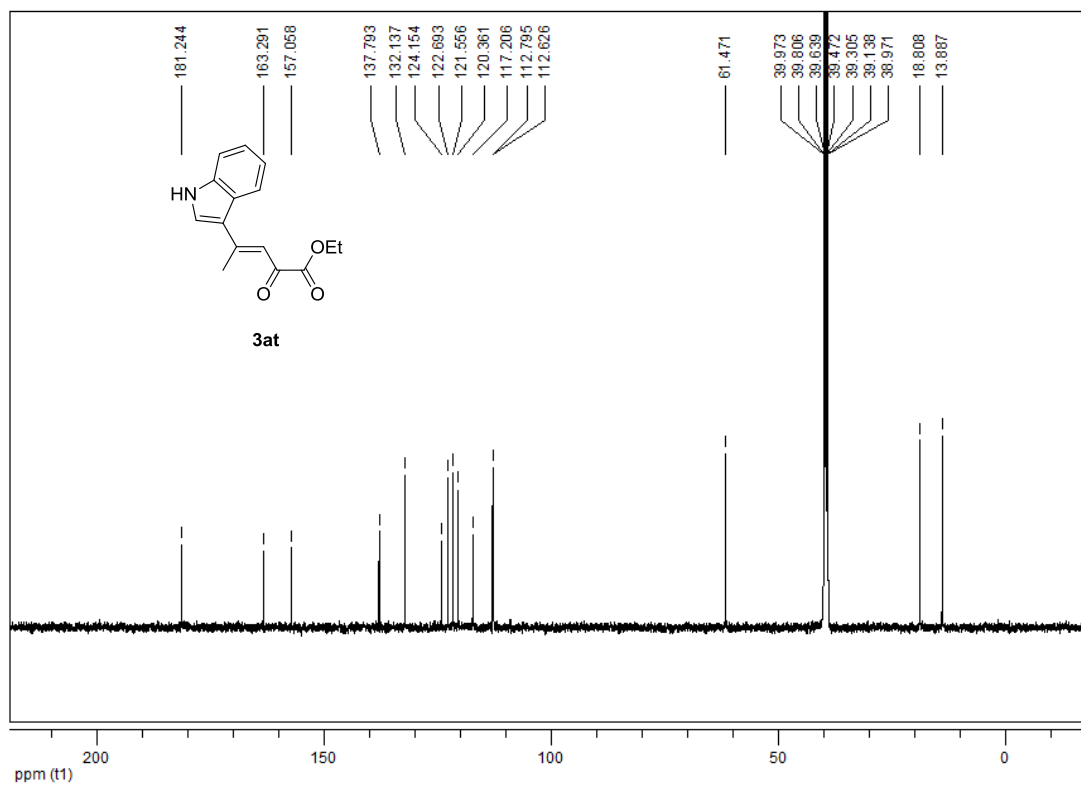



**4ba: <sup>1</sup>H NMR (500 MHz, CDCl<sub>3</sub>)**

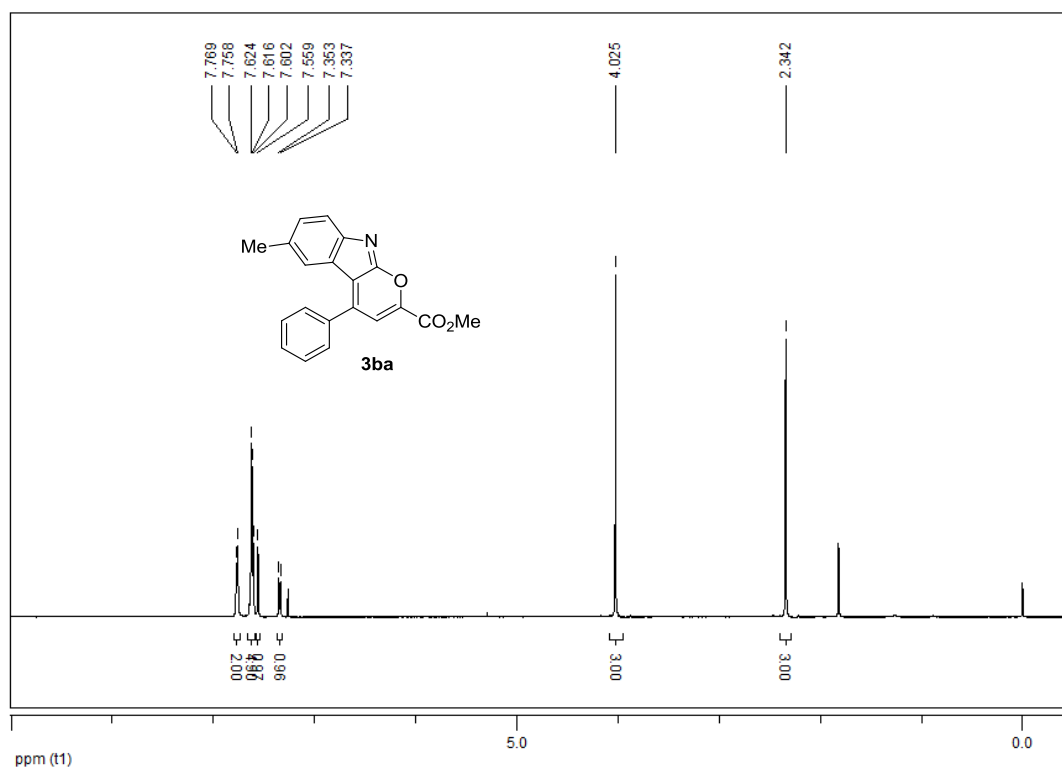

**4ba: <sup>13</sup>C NMR (125 MHz, CDCl<sub>3</sub>)**

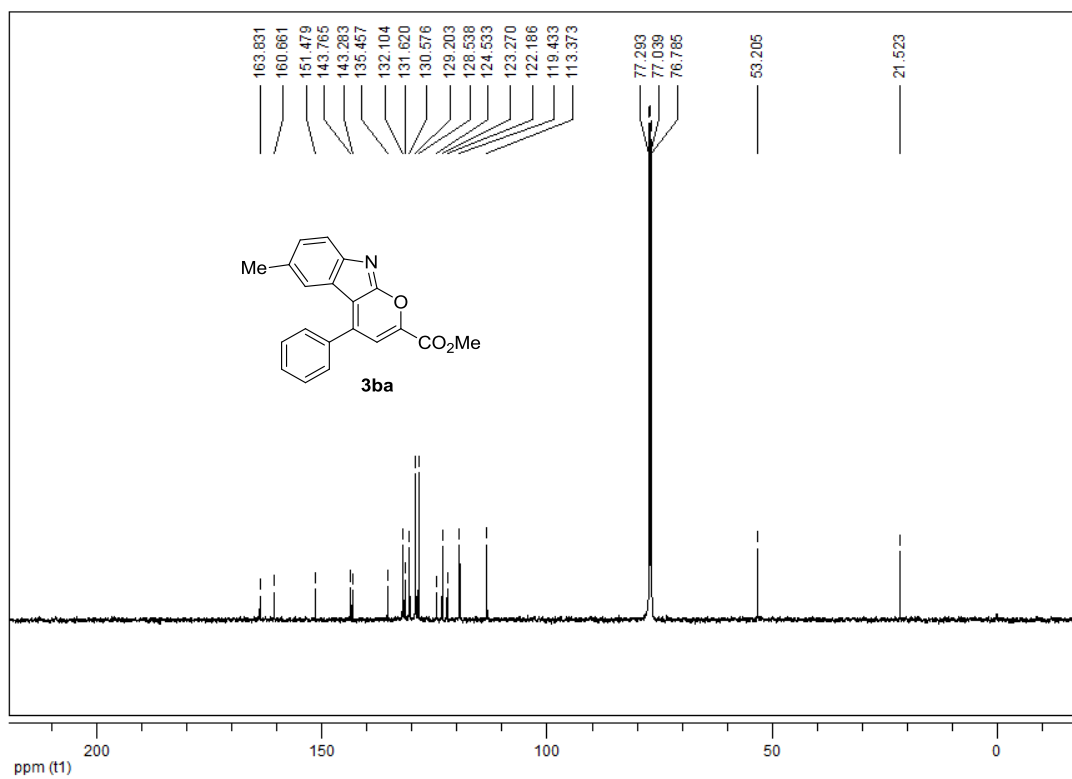

**4ca:  $^1\text{H}$  NMR (500 MHz,  $\text{CDCl}_3$ )**

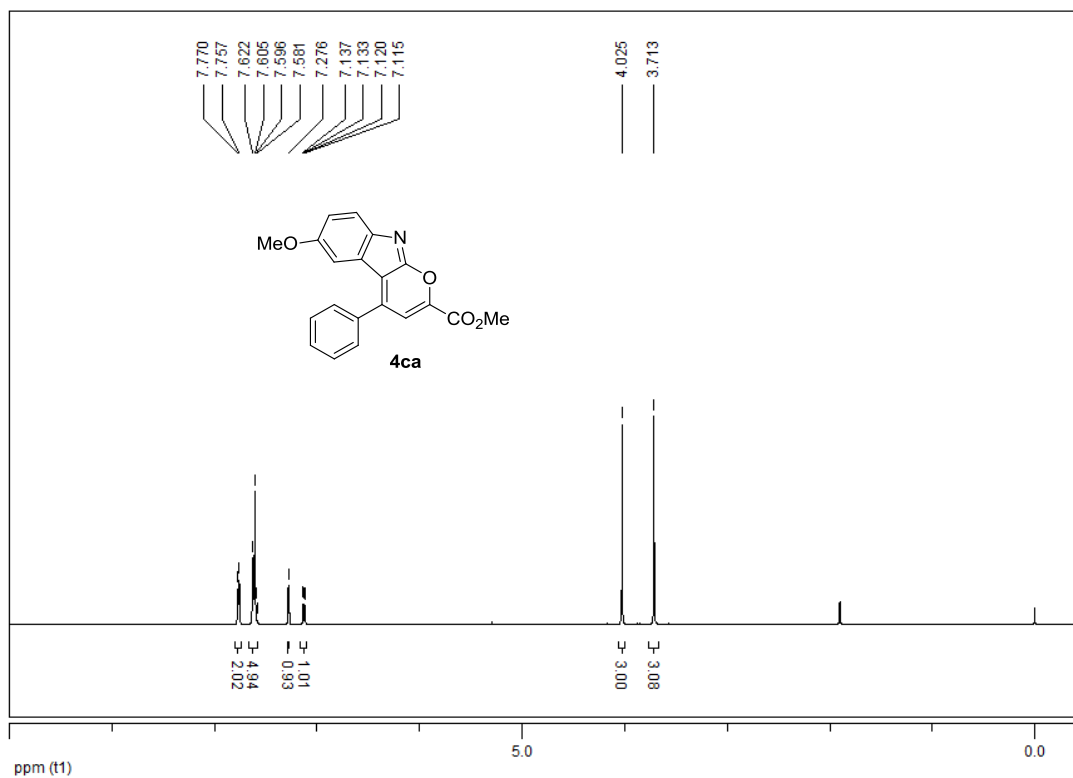

**4ca:  $^{13}\text{C}$  NMR (125 MHz,  $\text{CDCl}_3$ )**

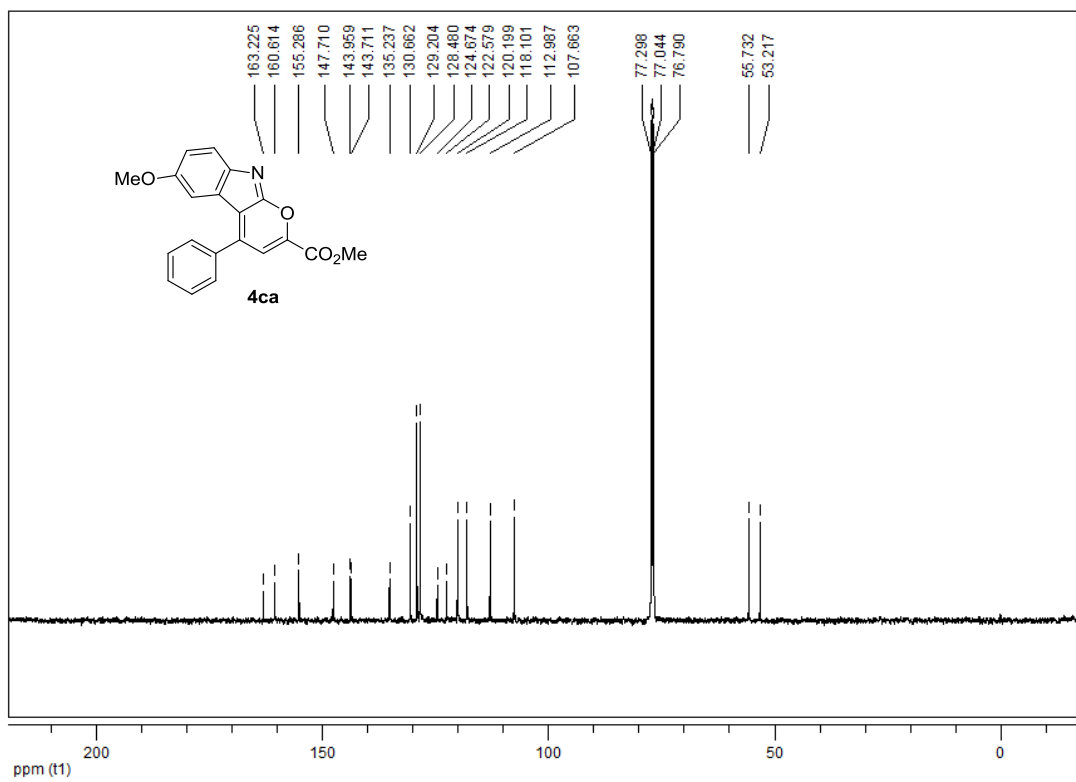

**4da: <sup>1</sup>H NMR (500 MHz, CDCl<sub>3</sub>)**

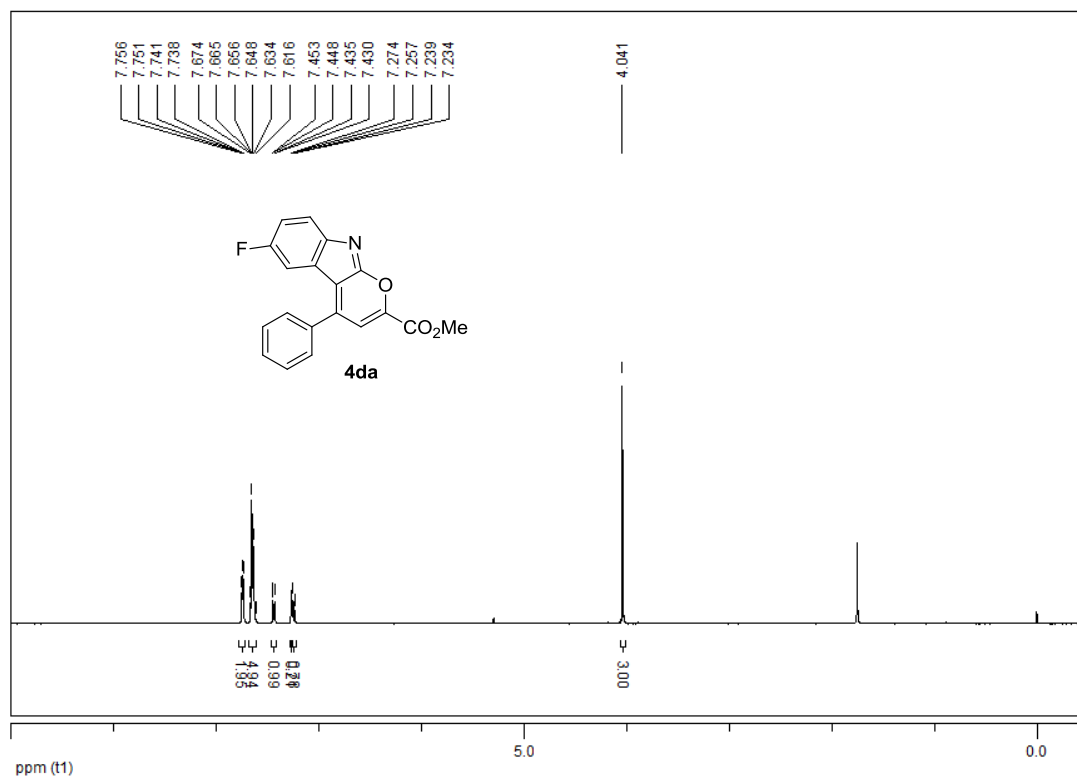

**4da: <sup>13</sup>C NMR (125 MHz, CDCl<sub>3</sub>)**

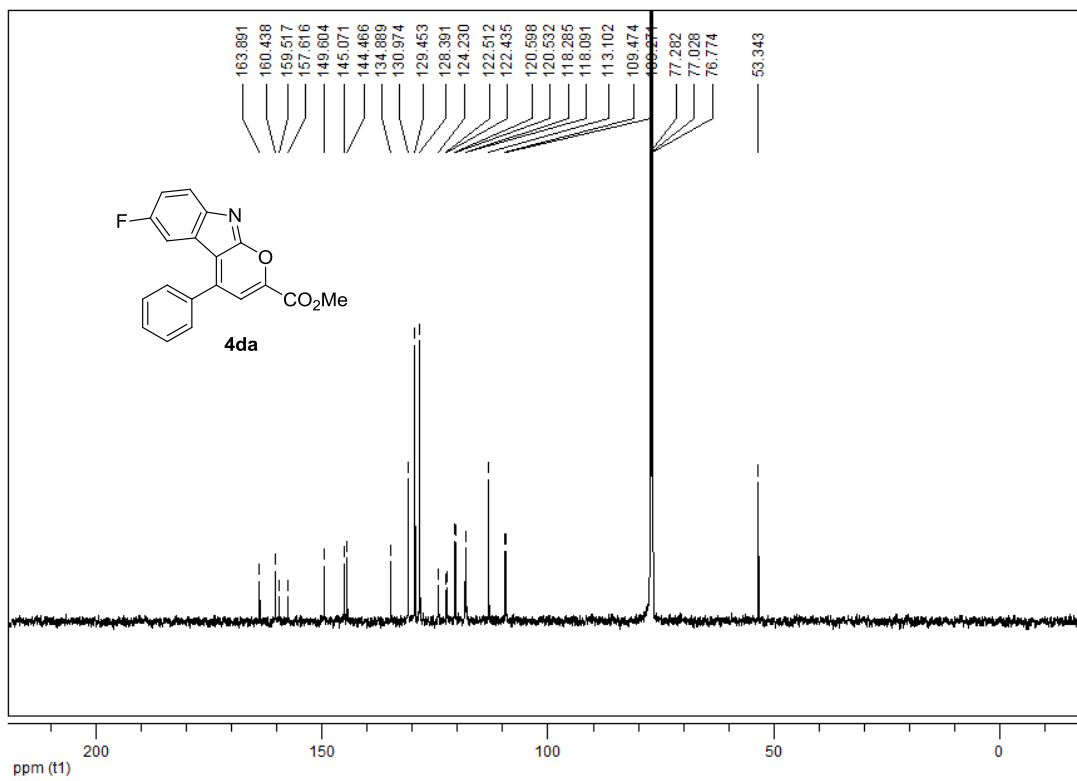







**4ha:  $^1\text{H}$  NMR (500 MHz,  $\text{CDCl}_3$ )**

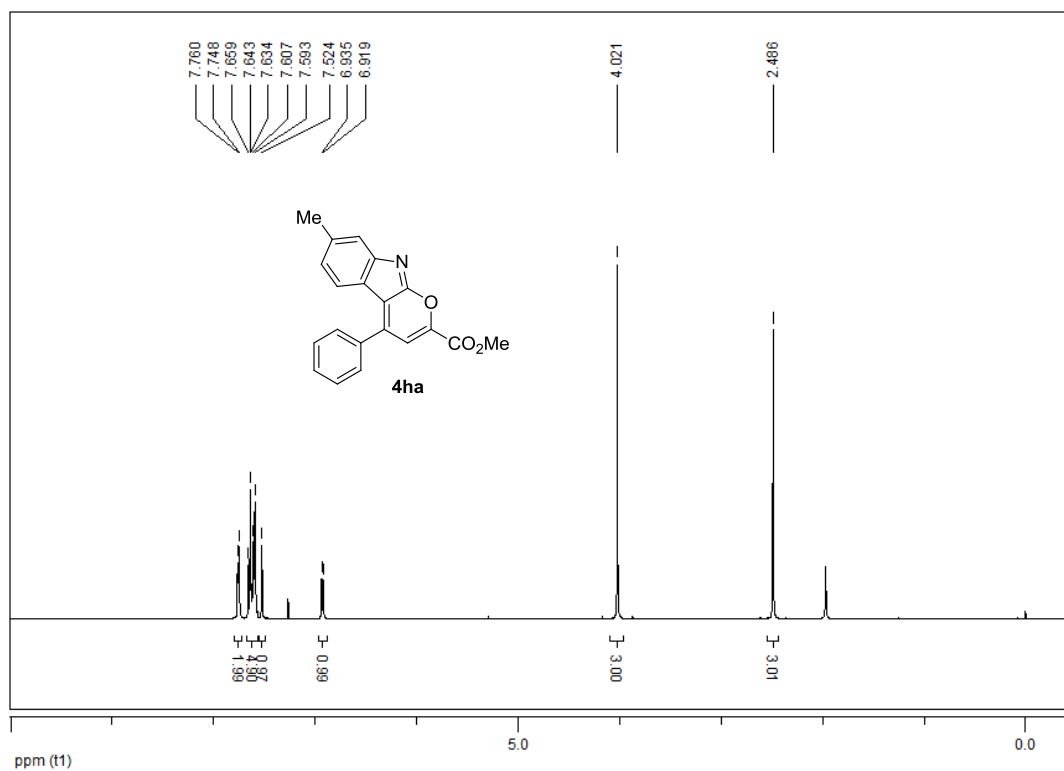

**4ha:  $^{13}\text{C}$  NMR (125 MHz,  $\text{CDCl}_3$ )**

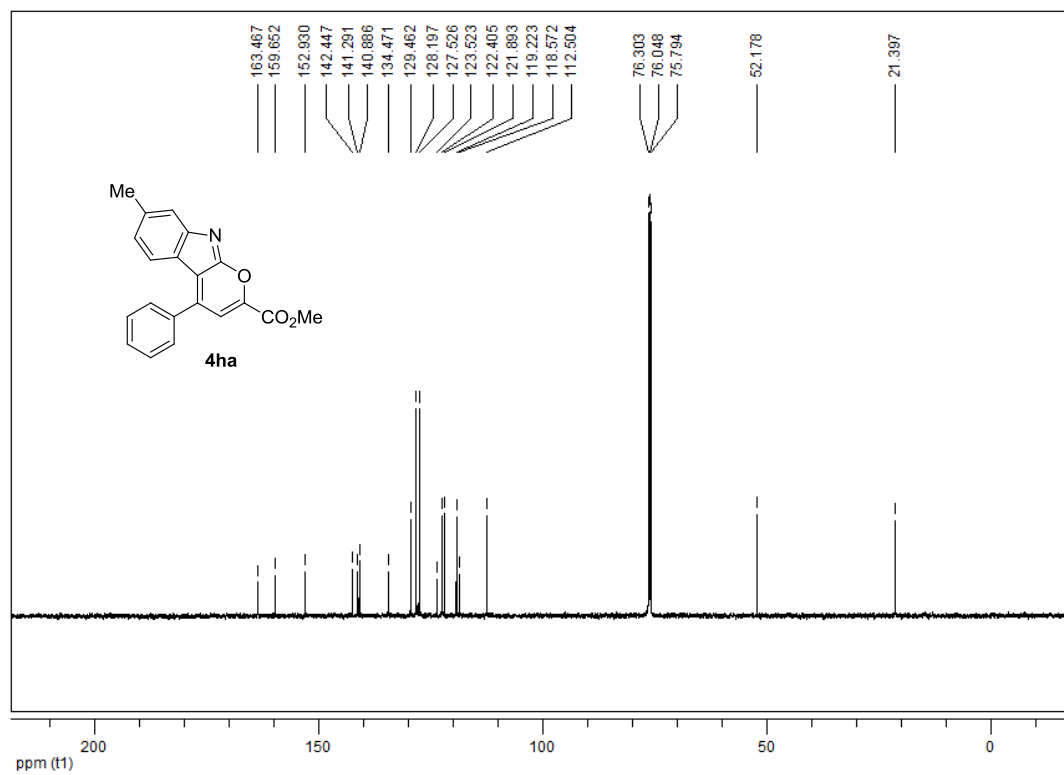







**6:  $^1\text{H}$  NMR (500 MHz,  $\text{CDCl}_3$ )**

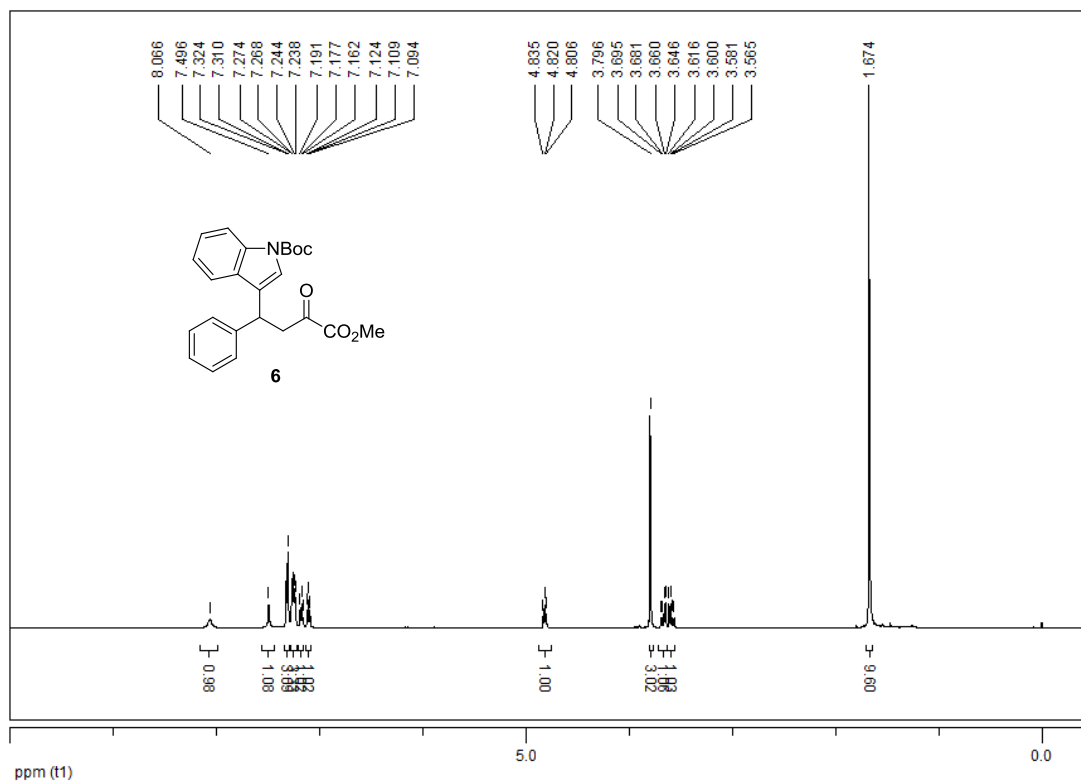

**6:  $^{13}\text{C}$  NMR (125 MHz,  $\text{CDCl}_3$ )**

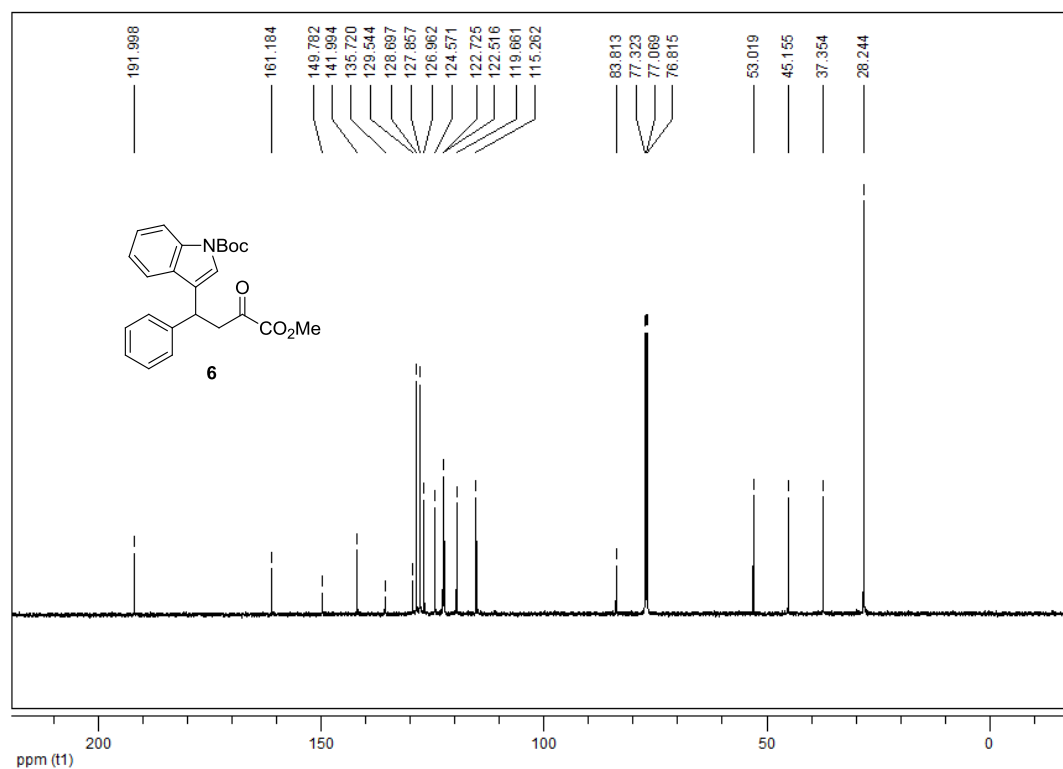



**12: <sup>1</sup>H NMR (500 MHz, DMSO-d<sub>6</sub>)**

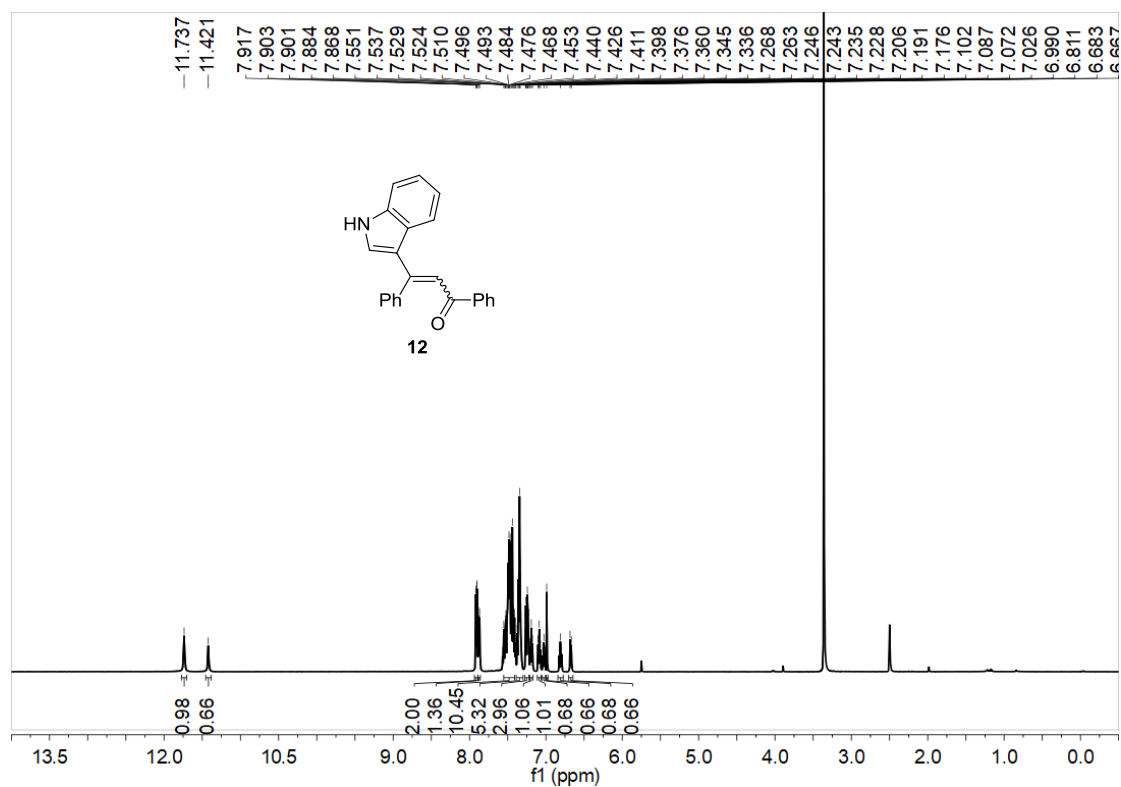

**12: <sup>13</sup>C NMR (125 MHz, DMSO-d<sub>6</sub>)**

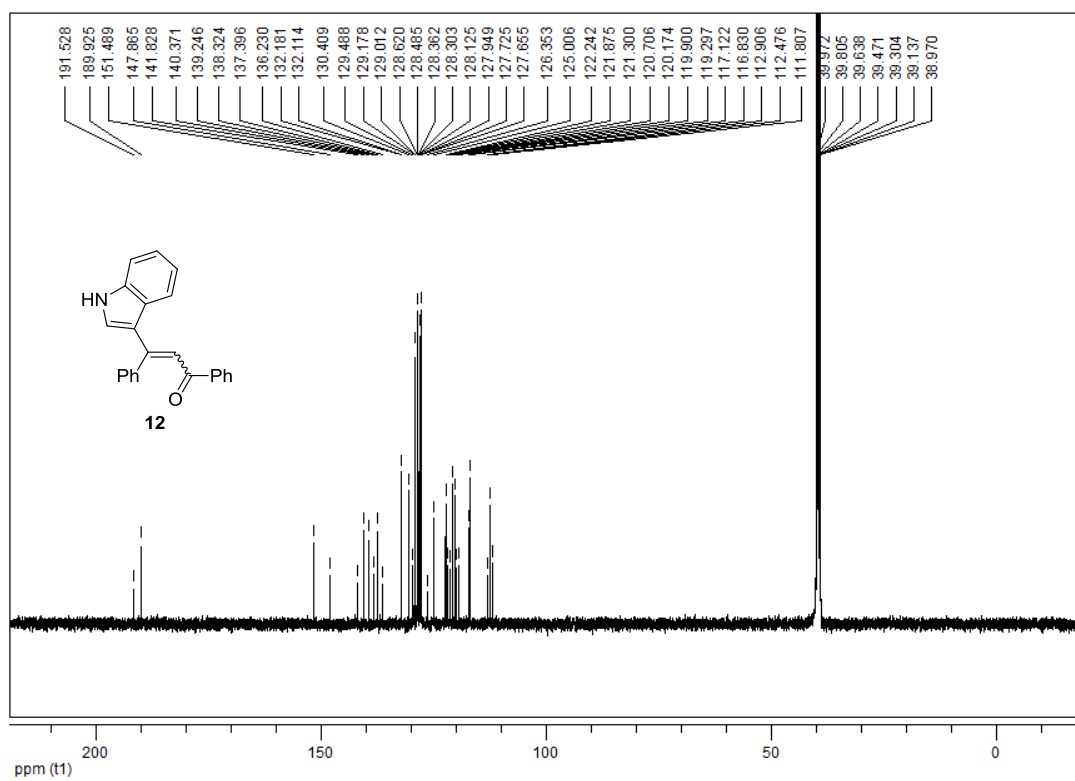

**13:  $^1\text{H}$  NMR (500 MHz,  $\text{CDCl}_3$ )**

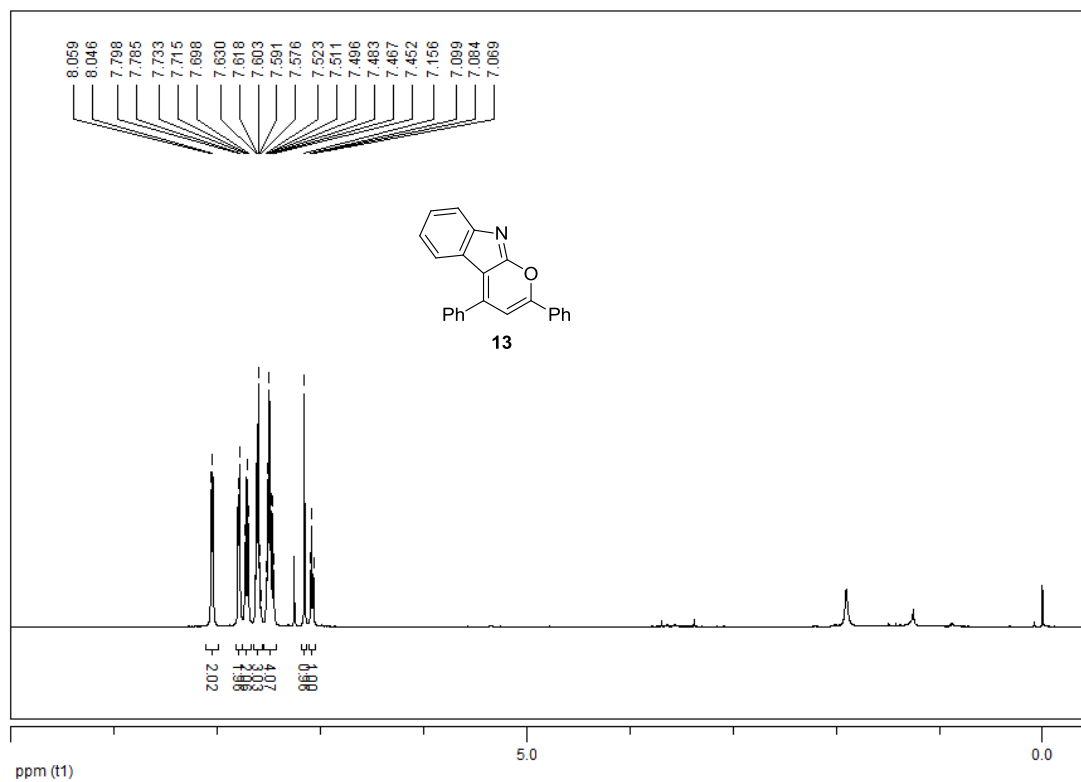

**13:  $^{13}\text{C}$  NMR (125 MHz,  $\text{CDCl}_3$ )**

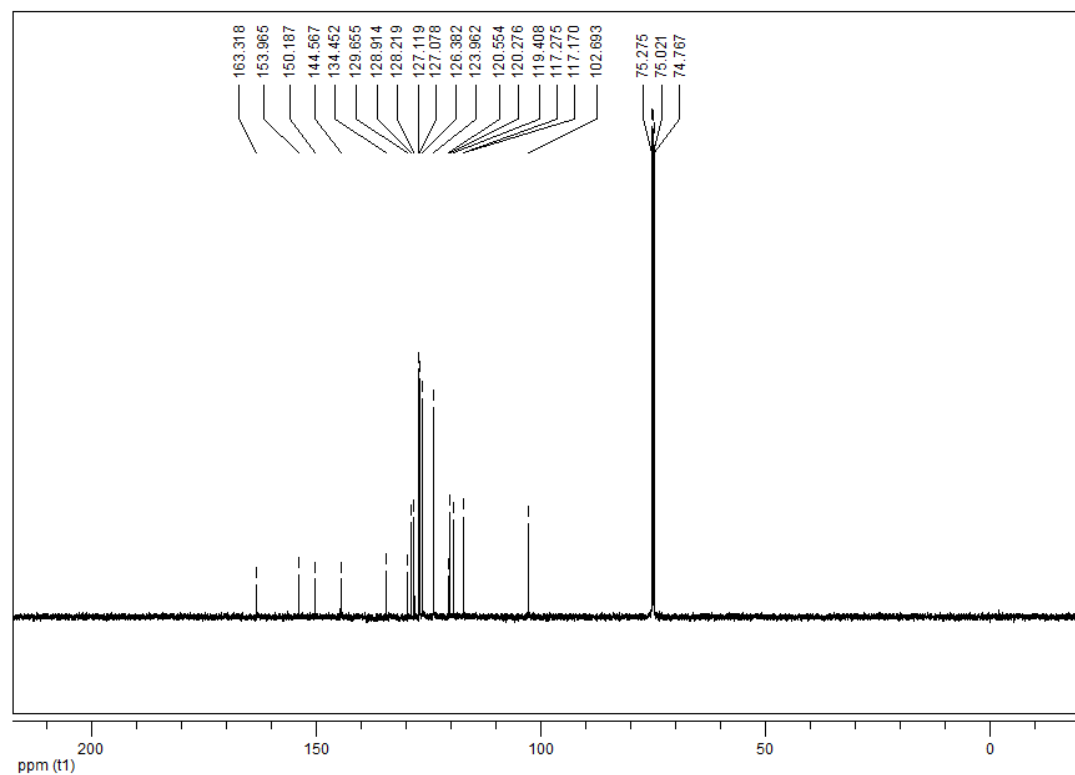



## IX. Reference

1. D. Liang, X. Li, W. Zhang, Y. Li, M. Zhang, P. Cheng, Br<sub>2</sub> as a novel Lewis acid catalyst for Friedel-Crafts alkylation of indoles with  $\alpha,\beta$ -unsaturated ketones. *Tetrahedron Lett.*, 2016, **57**, 1027.
2. Y. Qiao, X.-X. Wu, Y. Zhao, Y. Sun, B. Li, S. Chen, Copper-catalyzed successive C-C bond formations on indoles or pyrrole: a convergent synthesis of symmetric and unsymmetric hydroxyl substituted *N*-H carbazoles. *Adv. Synth. Catal.*, 2018, **360**, 2138.
3. J. Schönhaber, W. Frank, T. J. Müller, Insertion-coupling-cycloisomerization domino synthesis and cation-induced halochromic fluorescence of 2,4-Diarylpyrano[2,3-*b*]indoles. *Org. Lett.*, 2010, **12**, 4122.
